# Supplementary material for: Health-related quality of life and its changes of the Tibetan population in China: based on the 2013 and 2018 National Health Services Surveys
Source: PubMed Central journal article supplement — BMJ Open. 2023 Nov 19;13(11):e072854. doi: 10.1136/bmjopen-2023-072854 (PMC10660197; doi:10.1136/bmjopen-2023-072854), 2023-11-19
Supplement: bmjopen-2023-072854.draft_revisions.pdf [file bmjopen-2023-072854.draft_revisions.pdf]

# BMJ Open

BMJ Open is committed to open peer review. As part of this commitment we make the peer review history of every article we publish publicly available.

When an article is published we post the peer reviewers' comments and the authors' responses online. We also post the versions of the paper that were used during peer review. These are the versions that the peer review comments apply to.

The versions of the paper that follow are the versions that were submitted during the peer review process. They are not the versions of record or the final published versions. They should not be cited or distributed as the published version of this manuscript.

BMJ Open is an open access journal and the full, final, typeset and author-corrected version of record of the manuscript is available on our site with no access controls, subscription charges or pay-per-view fees (<http://bmjopen.bmj.com>).

If you have any questions on BMJ Open's open peer review process please email [info.bmjopen@bmj.com](mailto:info.bmjopen@bmj.com)

# BMJ Open

## Effect of High-Altitude on Health-Related Quality of Life: Based on the 2013 and 2018 National Health Services Survey of Tibet, China

|                               |                                                                                                                                                                                                                                                                                                                                                                                                                                                                                                                                                                                                                                                                                                                                                                                                                                                                                                                                                                                                                                                                                                                                                                                                                                                                                                             |
|-------------------------------|-------------------------------------------------------------------------------------------------------------------------------------------------------------------------------------------------------------------------------------------------------------------------------------------------------------------------------------------------------------------------------------------------------------------------------------------------------------------------------------------------------------------------------------------------------------------------------------------------------------------------------------------------------------------------------------------------------------------------------------------------------------------------------------------------------------------------------------------------------------------------------------------------------------------------------------------------------------------------------------------------------------------------------------------------------------------------------------------------------------------------------------------------------------------------------------------------------------------------------------------------------------------------------------------------------------|
| Journal:                      | <i>BMJ Open</i>                                                                                                                                                                                                                                                                                                                                                                                                                                                                                                                                                                                                                                                                                                                                                                                                                                                                                                                                                                                                                                                                                                                                                                                                                                                                                             |
| Manuscript ID                 | bmjopen-2023-072854                                                                                                                                                                                                                                                                                                                                                                                                                                                                                                                                                                                                                                                                                                                                                                                                                                                                                                                                                                                                                                                                                                                                                                                                                                                                                         |
| Article Type:                 | Original research                                                                                                                                                                                                                                                                                                                                                                                                                                                                                                                                                                                                                                                                                                                                                                                                                                                                                                                                                                                                                                                                                                                                                                                                                                                                                           |
| Date Submitted by the Author: | 17-Feb-2023                                                                                                                                                                                                                                                                                                                                                                                                                                                                                                                                                                                                                                                                                                                                                                                                                                                                                                                                                                                                                                                                                                                                                                                                                                                                                                 |
| Complete List of Authors:     | <p>Dou, Lei; Shandong University, Centre for Health Management and Policy Research, School of Public Health, Cheeloo College of Medicine; NHC Key Lab of Health Economics and Policy Research (Shandong University)</p> <p>Shi, Zhao; Shandong University, Centre for Health Management and Policy Research, School of Public Health, Cheeloo College of Medicine; NHC Key Lab of Health Economics and Policy Research (Shandong University)</p> <p>Zhaxi, Cuomu; Tibet University, Medical College; Tibet University, Center of Tibetan Studies (Everest Research Institute)</p> <p>Cidan, Zhuoga; Tibet University, Medical College; Tibet University, Center of Tibetan Studies (Everest Research Institute)</p> <p>Li, Chaofan; Shandong University, Centre for Health Management and Policy Research, School of Public Health, Cheeloo College of Medicine; NHC Key Lab of Health Economics and Policy Research (Shandong University)</p> <p>Zhaxi, Dawa; Tibet University, Medical College; Tibet University, Center of Tibetan Studies (Everest Research Institute)</p> <p>Li, Shun-Ping; Shandong University, Centre for Health Management and Policy Research, School of Public Health, Cheeloo College of Medicine; NHC Key Lab of Health Economics and Policy Research (Shandong University)</p> |
| Keywords:                     | PUBLIC HEALTH, Quality of Life, HEALTH SERVICES ADMINISTRATION & MANAGEMENT                                                                                                                                                                                                                                                                                                                                                                                                                                                                                                                                                                                                                                                                                                                                                                                                                                                                                                                                                                                                                                                                                                                                                                                                                                 |
|                               |                                                                                                                                                                                                                                                                                                                                                                                                                                                                                                                                                                                                                                                                                                                                                                                                                                                                                                                                                                                                                                                                                                                                                                                                                                                                                                             |

SCHOLARONE™  
Manuscripts

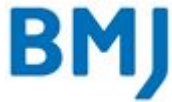

I, the Submitting Author has the right to grant and does grant on behalf of all authors of the Work (as defined in the below author licence), an exclusive licence and/or a non-exclusive licence for contributions from authors who are: i) UK Crown employees; ii) where BMJ has agreed a CC-BY licence shall apply, and/or iii) in accordance with the terms applicable for US Federal Government officers or employees acting as part of their official duties; on a worldwide, perpetual, irrevocable, royalty-free basis to BMJ Publishing Group Ltd ("BMJ") its licensees and where the relevant Journal is co-owned by BMJ to the co-owners of the Journal, to publish the Work in this journal and any other BMJ products and to exploit all rights, as set out in our [licence](#).

The Submitting Author accepts and understands that any supply made under these terms is made by BMJ to the Submitting Author unless you are acting as an employee on behalf of your employer or a postgraduate student of an affiliated institution which is paying any applicable article publishing charge ("APC") for Open Access articles. Where the Submitting Author wishes to make the Work available on an Open Access basis (and intends to pay the relevant APC), the terms of reuse of such Open Access shall be governed by a Creative Commons licence – details of these licences and which [Creative Commons](#) licence will apply to this Work are set out in our licence referred to above.

Other than as permitted in any relevant BMJ Author's Self Archiving Policies, I confirm this Work has not been accepted for publication elsewhere, is not being considered for publication elsewhere and does not duplicate material already published. I confirm all authors consent to publication of this Work and authorise the granting of this licence.

## Title page

**Title:** Effect of High-Altitude on Health-Related Quality of Life: Based on the 2013 and 2018 National Health Services Survey of Tibet, China

**Authors:**

Lei Dou<sup>1,2,3</sup>, Zhao Shi<sup>1,2,3</sup>, Zhaxi Cuomu<sup>4,5</sup>, Cidan Zhuoga<sup>4,5</sup>, Chaofan Li<sup>1,2,3</sup>, Zhaxi Dawa<sup>4,5\*</sup>, Shunping Li<sup>1,2,3\*</sup>

**Affiliations:**

<sup>1</sup> Centre for Health Management and Policy Research, School of Public Health, Cheeloo College of Medicine, Shandong University, Jinan, China

<sup>2</sup> NHC Key Lab of Health Economics and Policy Research (Shandong University), Jinan, China

<sup>3</sup> Center for Health Preference Research, Shandong University, Jinan, China

<sup>4</sup> Medical College of Tibet University, Lhasa, China

<sup>5</sup> Center of Tibetan Studies (Everest Research Institute), Tibet University, Lhasa, China

**\*Corresponding author:**

Shunping Li and Zhaxi Dawa are co- corresponding author.

Shunping Li: lishunping@sdu.edu.cn;

Zhaxi Dawa: 904397981@qq.com

# Effect of High-Altitude on Health-Related Quality of Life: Based on the 2013 and 2018 National Health Services Survey of Tibet, China

## Abstract

**Objective:** The Tibet Autonomous Region (TAR), on the Qinghai-Tibet plateau has an average altitude of 4000 m above sea level. It has been undergoing unprecedented economic growth and development, which may greatly affect the resident's health. Therefore, this study aimed to assess the impact of different altitudes on health-related quality of life (HRQoL) and explore changes in the HRQoL of the residents over time.

**Design:** Two cross-sectional population-based surveys were conducted in 2013 and 2018. A four-stage stratified cluster probability sampling framework was used for sampling.

**Setting:** China.

**Participants:** This study recruited 14752 participants in 2013 and 13106 participants in 2018

**Primary and secondary outcome measures:** The EQ-5D-3L was used to measure participants' HRQoL.

**Results:** The mean utility scores of the participants were  $0.969 \pm 0.078$  and  $0.966 \pm 0.077$  in 2013 and 2018, respectively. Pain/discomfort was the most frequently prevalent issue reported in 18.09 and 17.91% of the participants in 2013 and 2018, respectively. Tibetans living 3500–4000 m above sea level had the best HRQoL. Age, sex, employment status, educational attainment, chronic disease, and weekly physical activities were influencing factors associated with HRQoL.

**Conclusions:** The changes in HRQoL in the Tibetan population between 2013 and 2018 were minimal. Moreover, an association was observed between different altitudes and HRQoL in TAR. Based on the findings of this study, HRQoL changes should be characterized more extensively in Tibetans who are older, female, unemployed, and without formal education. Furthermore, targeted strategies need to be developed based on HRQoL and altitude-related influencing factors for residents at different altitudes.

## Strengths and limitations of this study

- We used Tibetan resident data from two National Health Service Surveys conducted in 2013 and 2018.
- We divided the residents into three different altitude groups based on the international altitude standard and analysed the changes in health-related quality of life of the Tibetan population.
- This is the first study to assess the relationship between altitude and residents' health-related quality of life.
- The same pool of participants was not characterized in the two surveys; however, some overlap may exist.

## Introduction

Majority of the world's population lives close to the sea or at low altitudes above sea level. While, approximately 400 million people live in plateau areas worldwide; most people live in valleys at lower altitudes[1]. The complex terrain and diverse topography of high-altitudes provide a unique climate with rarefied air and low atmospheric pressure, with only two-third oxygen levels as that at sea level[2]. High-altitude areas present a complex ecology in physical environment and population characteristics including genetics, lifestyle, socioeconomic factors, and access to medical care[3], directly or indirectly impact health[4]. Previous studies have reported that high-altitude is strongly associated with the many health issues including psychiatric disorders [5, 6], hypertension[7, 8], and cardiovascular diseases[4].

The Tibet Autonomous Region (TAR), located on the Qinghai-Tibet plateau in southwest China with an average altitude of 4000 m above sea level, is commonly referred to as the “Roof of the World”[8]. The TAR has an area of > 1.2 million km<sup>2</sup>, accounting for one-eighth of China's geographic area. In 2021, the population in TAR was 3.65 million with 90% of the population being Tibetan[9]. Its social and economic development levels are relatively low among China's provinces. Most of the TAR population comprises of farmers and herders, scattered in remote rural areas with limited income source mainly depending on agriculture[10]. The geographical environment of the plateau, relatively poor economic conditions, poor transportation and communication, and low access to medical services increased the health risks of residents compared to those in low-altitude areas[11]. China has been undergoing a period of unprecedented rates of economic growth, development, and poverty reduction in recent decades, including the TAR[12]. Various economic, educational, and health policies have been implemented for the development of society, which may have greatly affected the health of residents living in TAR[13].

Health-related quality of life (HRQoL) is considered an important health outcome measure in recent years to inform patient-centred care, clinical decision-making, health policy and reimbursement decisions[14].

1 HRQoL refers to the impact of health on the quality of life of individuals focusing on individuals' health  
2  
3 influencing their goals, expectations, standards, and concerns. It is a multidimensional concept referring to  
4  
5 people's capacity to perform daily activities (i.e., functioning) in addition to their perspective and subjective  
6  
7 management of their health[15]. Thus, HRQoL attempts to represent quality of life in the context of one's  
8  
9 health and illness[16]. The EuroQol5-Dimensions (EQ-5D) is the most widely used preference-based  
10  
11 instrument to measure and evaluate HRQoL in population surveys, clinical studies, and economic  
12  
13 evaluations[17]. The EQ-5D-3L was included in the 2008 National Health Services Surveys (NHSS) for the  
14  
15 first time to assess the population health status in China<sup>18</sup>.  
16  
17  
18  
19  
20  
21

22 Previous studies have assessed the population HRQoL using EQ-5D-3L in mainland China including  
23  
24 Heilongjiang [18], Gansu [19], Shanxi [20], and Hunan[21]. However, these studies focused on low-altitude  
25  
26 areas. Thus, the health consequences of living at high-altitudes are underexplored. Moreover, all previous  
27  
28 studies are cross-sectional, and no studies have compared data between two rounds of surveys. Additionally,  
29  
30 previous studies on the health status of Tibetan population are limited due to the geographical environment,  
31  
32 lack of basic resources and facilities, and low population density. Therefore, evaluation of HRQoL and its  
33  
34 changes in the Tibetan population is important to explore the effects of high-altitude to identify potential  
35  
36 altitude-health risks. Therefore, the aim of this study was to assess the HRQoL of Tibetan people and its  
37  
38 changes over time, and the impact of different high-altitudes on HRQoL based on the Health Service Survey  
39  
40 of Tibet in 2013 and 2018.  
41  
42  
43  
44  
45  
46  
47

## 48 **Methods**

### 49 **Study design and population**

50  
51 In this study, data were extracted from the 2013 and 2018 NHSS of the TAR in China. A four-stage stratified  
52  
53 cluster probability sampling strategy was used to select representative participants. Each stage had a  
54  
55  
56  
57  
58  
59  
60

1 systematic random sampling approach. In the first stage, 22 counties (both in 2013 and 2018) were selected  
2  
3 from the seven cities in Tibet in proportion to their population size. In the second stage, 44 and 50  
4  
5 townships/sub-districts were identified in 2013 and 2018, respectively, in the selected counties. Then, three  
6  
7 residential villages or communities were randomly selected from each township or sub-district. Finally, 20  
8  
9 households from each residential community or village were randomly selected for participation.  
10  
11

12  
13  
14 Questionnaires were administered to the participants through face-to-face interviews. The students majoring  
15  
16 in Preventive Medicine at Medical College of Tibet University were uniformly recruited and trained to be  
17  
18 interviewers by supervisors who had participated in national training. Pre-survey training workshops were  
19  
20 offered to all interviewers following a standardised protocol. Eligible interviewers had to demonstrate proper  
21  
22 understanding of the purpose of the NHSS and their ability to meet data collection standards developed by the  
23  
24 Centre for Health Statistics and Information. The interviewers visited the selected households, and all family  
25  
26 members in a sampled household were eligible to participate in the survey. Before the survey commenced,  
27  
28 participants were informed of the survey's purposes and procedure and then provided informed consent.  
29  
30  
31  
32  
33

34  
35 In total, 14752 participants in 2013 and 13106 participants in 2018 completed the survey. The exclusion  
36  
37 criteria in this study were as follows: (1) participants aged < 15 years (n = 3412 and 2677 in 2013 and 2018,  
38  
39 respectively), based on the eligibility for EQ-5D-3L; (2) participants who did not answer the questions by  
40  
41 themselves (n = 1001 and 3798 in 2013 and 2018, respectively); (3) participants with missing values for key  
42  
43 variables (n = 4 and 1 in 2013 and 2018, respectively); and (4) participants with ethnicities other than Tibetan  
44  
45 (n = 88 and 194 in 2013 and 2018, respectively). Overall, final sample size of 10247 in 2013 and 6436 in 2018  
46  
47 were included in this study.  
48  
49  
50  
51

## 52 53 **Measurement of HRQoL**

54  
55  
56 The EQ-5D-3L is one of the most widely used HRQoL measurement instruments classified into five  
57  
58 dimensions: mobility (MO), self-care (SC), usual activities (UA), pain/discomfort (PD), and  
59  
60



1 anxiety/depression (AD). Each dimension contains three functioning response levels (no problems, moderate  
2  
3 problems, and extreme problems), generating 243 ( $3^5$ ) possible health states, with the best state indicated by  
4  
5 the response “11111” and the worst health state indicated by the response “33333”[22]. A single utility index  
6  
7 score can be assigned to each health state using a value set, developed in a valuation study based on the general  
8  
9 population’s health preferences.  
10  
11  
12

13  
14 Four value sets exist for the EQ-5D-3L in China with the first value set developed in 2014 (3L<sub>2014</sub> value  
15  
16 set) using a sample comprising residents mainly from urban areas[23], the second value set developed in 2018  
17  
18 (3L<sub>2018</sub> value set) adopted a more representative sample of residents from both rural and urban areas[24], the  
19  
20 other two value set developed in 2022 (3L<sub>2022</sub> value set) recruited participants from rural areas of five cities[25].  
21  
22 In this study, we chose to adopt the 3L<sub>2018</sub> value set, although the 3L<sub>2014</sub> value set has been used more  
23  
24 frequently than the 3L<sub>2018</sub> value set. The main reason for the choice was based on the participants in the  
25  
26 3L<sub>2014</sub> value set being selected conveniently from big cities in urban areas through quota sampling. While  
27  
28 the 3L<sub>2018</sub> value set, a more representative sample of respondents was obtained from both rural and urban  
29  
30 areas using a random sampling method[26]. The rural population accounts for half of the Chinese population,  
31  
32 and large disparities exist in socioeconomic status, lifestyle, and health status between urban and rural areas  
33  
34 in China[27]. In the two NHSS in the TAR, more than 75% of participants were from farming and pastoral  
35  
36 areas. The theoretical utility index score of the 3L<sub>2018</sub> value set ranges from 0.170–1, with 1 representing full  
37  
38 health[24]. To evaluate the robustness and sensitivity of the 3L<sub>2018</sub> value set, we also used the 3L<sub>2022</sub> value set  
39  
40 to analyse the main results revealing that the main results of the two value sets had the same trends  
41  
42 (Supplementary Table 1).  
43  
44  
45  
46  
47  
48  
49  
50  
51  
52

### 53 **Independent variables**

54  
55 In this study, the independent variables were altitude-related, sociodemographic, and clinical disease variables,  
56  
57 and health-related behaviours. The altitude-related variables included location and altitude. The participants  
58  
59  
60

1 were divided into rural and urban groups based on their geographical location. The NHSS did not collect data  
2  
3 on the altitude of their residence; therefore, we used Google Maps to obtain the precise altitude. Altitudes  
4  
5 were defined as high (1500–3500 m), very high (3500–5500 m), and extreme altitude (>5500 m), as suggested  
6  
7 by the International Society for Mountain Medicine[28]. In this study, based on the China's policy of  
8  
9 subsidising plateau areas[29], we divided the plateau areas into three altitude groups, high (< 3500 m), very  
10  
11 high (3500–4000 m), and extreme altitude (> 4000 m).  
12  
13  
14

15 Sociodemographic variables were sex, age, employment status, educational attainment, and marital status.  
16  
17 We divided age into three groups: 15–44, 45–65, and  $\geq 65$  years old. Employment status was divided into  
18  
19 employed, retired, and unemployed. Educational attainment was divided into three groups: illiterate, primary  
20  
21 school, junior high school, and above. Marital status was divided into single, married, divorced, and other.  
22  
23  
24  
25

26 The clinical disease variables included diagnosis of the participant with any illness within two weeks before  
27  
28 survey and the number of chronic diseases during the past six months. A chronic condition was defined as a  
29  
30 condition diagnosed by a doctor with symptoms persisting or relevant medical treatment continuing over the  
31  
32 past six months.  
33  
34  
35

36 Health-related behavioural variables were current smoking status, divided into three groups: smoking all  
37  
38 the time, has ever smoked, and never smoked. Participants were asked to perform weekly physical activities  
39  
40 during the past six months, and the frequency of physical activities included three groups: exercised never,  
41  
42 1–5 times, and > 6 times.  
43  
44  
45  
46

### 47 **Patient and public involvement**

48 Patients and the public were not involved in the design, conduct, reporting or dissemination plans of this  
49  
50 research.  
51  
52  
53

### 54 **Statistical analysis**

55 Descriptive statistics were used for participants' characteristics and the reported problems on the five  
56  
57  
58  
59  
60

1 dimensions of the EQ-5D-3L. Continuous variables were described as mean and standard deviation (SD),  
2  
3  
4 whereas categorised variables were described as frequency and percentages. Student's *t* test or analysis of  
5  
6 variance (ANOVA) was used when variables conformed to an approximately normal distribution; otherwise,  
7  
8 the Mann-Whitney *U* test or Kruskal-Wallis *H* test was used. Categorical variables were compared between  
9  
10 the groups using the chi-square test. As the EQ-5D-3L utility index was left-skewed with a large proportion  
11  
12 of respondents in full health, a Tobit regression model was used to assess the association between influencing  
13  
14 factors and the EQ-5D-3L health utility index. Data were entered into Epidata3.1 and analysed using SPSS  
15  
16 24.0, and STATA 15.0. A two-tailed  $p < 0.05$  was considered statistically significant.  
17  
18  
19  
20  
21

## 22 Results

### 23 Participant characteristics

24  
25  
26 The baseline characteristics of the participants are listed in Table 1. In 2013, more than half of the participants  
27  
28 were in the 16–44 years age group (56.15%), and older participants accounted for < 15% of the participants  
29  
30 (11.03%) and less than half of the participants were male (46.51%). Moreover, 57% of participants had never  
31  
32 received education and 14.98% of the participants were unemployed. More than four out of five participants  
33  
34 resided in rural areas (84.89%) with an average altitude of  $3838 \pm 526$  m. Overall, 11.35% of participants  
35  
36 reported having a disease during 2 weeks before data collection, while, more than half of participants (65.64%)  
37  
38 had no chronic diseases during the past 6 months.  
39  
40  
41  
42  
43  
44

45  
46 In 2018, the sociodemographic characteristics of the participants were basically the same as those in 2013.  
47  
48 The average age was  $45.22 \pm 14.71$  years, and more than half of the participants were female (56.62%). Of  
49  
50 the participants, 52.02% never had education, 81.23% were employed, 78.26% were married, and 77.50%  
51  
52 lived in rural areas with an average altitude of  $3903 \pm 495$  m. Most of the participants (85.05%) were non-  
53  
54 smokers, and 62.99% had never engaged in weekly physical activities during the past 6 months. Characteristics  
55  
56 of the participants in different altitudes were shown in supplementary Table 2.  
57  
58  
59  
60

## Health problems reported

In two rounds of surveys, pain/discomfort was the most frequently reported problem in 18.09% of the participants in 2013 and 17.91% of the participants in 2018. Problems with self-care were least prevalent, reported in 7.75 and 8.47% of the participants in 2013 and 2018, respectively. As compared to the reported health problems in 2013, reported problems increased in mobility (by 1.26%), self-care (by 0.72%), usual activities (by 0.72%), and anxiety/depression (by 3.78%) in 2018. While, reported problems in pain/discomfort decreased by 0.18% (Table 2).

Figure 1 summarises the percentage of participants with self-reported problems on the EQ-5D-5L based on altitude groups. Among the three altitude groups, the 3500–4000 m group had the least reported problems in all five dimensions. However, the < 3500 m and the > 4000 m groups were more likely to report problems in mobility, self-care, and usual activities. Meanwhile, as compared to other altitude groups, participants living below 3500 m reported the most problems in the pain/discomfort and anxiety/depression dimensions.

## EQ-5D-3L health utility scores based on participant's characteristics

Figure 2 presents the utility scores of the EQ-5D-3L and their distribution among the participants. It revealed a left-skewed distribution with skewness of -4.189 in 2013 and -4.642 in 2018, ranging from 0.170 to 1.000. The states of 11111 (no problems in any dimension) were reported in 74.05% and 70.09% of the participants in 2013 and 2018, respectively. The EQ-5D-3L utility scores stratified by characteristics in different years and altitudes are listed in Table 3. The mean utility score of the participants was  $0.966 \pm 0.077$  in 2018, slightly lower than that in 2013 ( $0.969 \pm 0.078$ ). The mean utility scores of the participants at < 3500, 3500–4000 and >4000 m altitudes were  $0.965 \pm 0.078$ ,  $0.973 \pm 0.073$ , and  $0.963 \pm 0.083$ , respectively. Furthermore, several variables had statistically significant differences at different levels.

## Factors associated with HRQoL in different altitudes

1 The results of the multivariate analyses of the factors associated with HRQoL at different altitudes are  
2  
3 presented in Table 4. In all altitude groups, the EQ-5D-3L utility scores of females were lower than those of  
4  
5 males ( $p < 0.001$ ) and decreased with age. Participants with junior high school education and above had  
6  
7 significantly higher utility scores than the participants without junior high school education. Moreover,  
8  
9 unemployed participants had lower scores than employed participants. Additionally, participants without any  
10  
11 diseases during the past two weeks and chronic diseases during the past six months had higher scores than  
12  
13 those with diseases. Furthermore, weekly physical activities  $>$  six times had a positive effect on HRQoL.  
14  
15 Moreover, retired Tibetans had lower utility scores than employed Tibetans ( $p = 0.019$ ) in the  $< 3500$  m group.  
16  
17 Tibetans who were married, lived in urban areas, and performed weekly physical activities between 1–5 times  
18  
19 had higher utility scores in 3500–4000 m group. In the  $> 4000$  m group, ex-smokers had lower utility scores  
20  
21 than smokers ( $p < 0.001$ ).  
22  
23  
24  
25  
26  
27  
28  
29

## 30 Discussion

31  
32  
33 To the best of our knowledge, this is the first study to evaluate the impact of different high-altitudes on HRQoL  
34  
35 of Tibetan people and its changes over time, based on a representative sample from the NHSS of Tibet in  
36  
37 China. HRQoL changes over time in the Tibetan population in five years (2013–2018) are minimal, and health  
38  
39 utility scores in 2018 were slightly lower than those in 2013. Moreover, we explored the effect of different  
40  
41 altitudes on HRQoL, and Tibetans living at 3500–4000 m had the best HRQoL. Our study also identified  
42  
43 factors influencing HRQoL including females, elders, unemployed, and more chronic diseases with a negative  
44  
45 impact. While, higher education levels, no disease during the past two weeks, and frequent weekly physical  
46  
47 activities had a positive impact on HRQoL of the Tibetan population. Moreover, the focus should be on retired  
48  
49 residents at  $< 3500$  m, unmarried and rural residents living in at 3500–4000 m, and ex-smokers living at  $>$   
50  
51  
52  
53  
54  
55  
56  
57 4000 m.  
58

59 The average health utility score of the population was 0.969 (SD  $\pm$  0.078) in 2013 and 0.966 (SD  $\pm$  0.077)

1 in 2018, higher than that reported in Heilongjiang, Hunan, and Shanxi in China[18, 19, 21]. This may be due  
2  
3  
4 to the use of two different 3 L value sets used to calculate the utility index score. Compared to the 3L<sub>2018</sub>  
5  
6 algorithm, the 3L<sub>2014</sub> algorithm includes a constant term and N3, resulting in a utility value gap between full  
7  
8 health and the second-best health state, reducing the values of other health states[30]. Therefore, the 3L<sub>2018</sub>  
9  
10 index score was systematically higher than the 3L<sub>2014</sub> index score at absolute levels[26]. The result also  
11  
12 indicated that health utility scores of two rounds of surveys were significantly lower than the that of the general  
13  
14 Chinese population, confirming regional and residential disparities in HRQoL of the Chinese populations[31].  
15  
16 The eastern–middle–western disparities in development have existed historically. Although in recent years  
17  
18 China’s development strategy has focused more on western areas including implementing poverty alleviation  
19  
20 policies, promoting the construction of infrastructure, low taxation, and national level fiscal transfer to the  
21  
22 middle and western areas, a huge gap still exists between regions[27] with lower HRQoL in residents of  
23  
24 western regions than that of those in the eastern region.  
25  
26  
27  
28  
29  
30

31  
32 Based on the HRQoL changes between the two rounds of surveys, health utility scores in 2018 were  
33  
34 slightly lower than those in 2013, and statistical differences existed in the total population and at different  
35  
36 demographic characteristics levels. However, the changes between 2013 and 2018 were minimal and failed to  
37  
38 reach the threshold minimal clinically important difference (MCID) of ~0.074 based on EQ-5D-3L[32]. This  
39  
40 is consistent with a previous study on the changes in HRQoL in the Chinese population between 2008 and  
41  
42 2013, and the combination of changing health problems resulted in a small decline in health utility score<sup>34</sup>.  
43  
44 This could be due to proportion of extreme problems reported by EQ-5D-3L, with 0.42 to 0.45% reporting  
45  
46 extreme problems in anxiety/depression and pain/discomfort compared to 2013. According to the 3L<sub>2014</sub>  
47  
48 algorithm, the value in level-3 (L3) parameters is larger than level-2 (L2) or level-1 (L1) with increasing health  
49  
50 state severity. Hence, for a health transition involving both improvement and deterioration, the magnitude of  
51  
52 health gain from improvement in a certain dimension may be offset to a large extent by deterioration in another  
53  
54  
55  
56  
57  
58  
59  
60

1 dimension[26]. Another possible reason may be related to the changing demographic and socioeconomic  
2  
3 status in China. Between 2013 and 2018, the government implemented a series of policies, especially the  
4  
5 targeting poverty alleviation strategy, driving continuous rapid growth of residents' income and further  
6  
7 improving the consumption level and length of life. Life expectancy increased from 76.3–77.0 years during  
8  
9 this time<sup>35</sup>. However, the aging of the population, unhealthy lifestyles, and environmental exposure have led  
10  
11 to the rising prevalence of chronic diseases and functional limitations, related to lower HRQoL among the  
12  
13 Tibetan population.  
14  
15  
16  
17

18  
19 Pain/discomfort was the most frequently reported problem in this study similar to previous studies in  
20  
21 China, however, the absolute proportion of each dimension reported was higher than the general population  
22  
23 trends based on the NHSS data[31] and other provincial studies in China[18, 20, 21]. This may be due to the  
24  
25 plateau disease[33]. Residents living on the plateau for a long time evolve a unique physiological mechanism  
26  
27 to adapt to the environment. However, some residents gradually lose their adaptability and suffer from various  
28  
29 acute or chronic diseases related to the plateau environment under the stimulation of continuous hypoxia and  
30  
31 low pressure[34]. The two-week illness prevalence rate of residents aged  $\geq 15$  years in Tibet was 20.1% in  
32  
33 2018, and hypertension has been reported as the most common chronic disease[35]. A previous study reported  
34  
35 that the prevalence of hypertension in Tibet is higher than the Chinese national level and is the highest among  
36  
37 all provinces, as well as higher than other residents living at high altitudes[36, 37]. Other studies higher  
38  
39 prevalence of oxygen-related cardiovascular diseases, chronic respiratory diseases, digestive diseases, and  
40  
41 respiratory infections (e.g., high-altitude pulmonary oedema) with high-altitude[38]. Moreover, Tibetans  
42  
43 living at  $> 5500$  m altitudes with long-term residence and heavy exertion, may be at increased risk of  
44  
45 developing chronic mountain sickness[39]. As altitude increases, progressive reductions in barometric  
46  
47 pressure, air temperature, and air humidity are observed. Headache, shortness of breath, chest tightness,  
48  
49 anorexia, dizziness, limb fatigue, and sleep disturbances were common symptoms of Tibetan.[35]  
50  
51  
52  
53  
54  
55  
56  
57  
58  
59  
60

1 Those living in low-altitude areas (< 3500 m) reported the most problems in anxiety/depression consistent  
2  
3 with previous studies. A large sample survey of the prevalence of depression among Tibetans of the Qinghai-  
4  
5 Tibet Plateau was 28.6%, higher than that in the general Chinese population and higher than that reported in  
6  
7 a western study with high-altitude samples[40]. The prevalence of depression is significantly correlated with  
8  
9 climatic pressure, particularly altitude[41]. Generally, the combined effects of harsh natural environment on  
10  
11 the plateau, high-altitude hypoxia, low atmospheric pressure, intense ultraviolet radiation, relatively weak  
12  
13 community support caused by low population density, and lack of access to mental health resources increases  
14  
15 the severity of depression among those living in high-altitude areas[42-44]. In this study, the area with an  
16  
17 altitude of < 3500 m was located southeast of the TAR. Nyingchi City, with an average altitude of 3100 m,  
18  
19 has the lowest altitude and wettest climate in TAR. With convenient transportation and multiple splendid  
20  
21 sceneries, tourism is the main source of income in this area, attracting millions of people traveling for  
22  
23 sightseeing, mountaineering, and trekking every year[38]. Previous studies have reported a significant  
24  
25 association between tourism impact and residents' quality of life[45, 46]. Tourism provides employment  
26  
27 opportunities and tax revenues, supports economic diversity, and services and products enjoyed by  
28  
29 residents[47, 48]. However, negative impacts of tourism on residents' QOL have been reported including  
30  
31 crowding, traffic and parking issues, criminality, and cost of living, changes in hosts' way of life, and friction  
32  
33 between tourists and residents[49]. The perceived negative impacts, negative emotions, pressure, and relative  
34  
35 deprivation of the residents will affect their subjective well-being, leading to psychological problems  
36  
37 including anxiety and depression. Therefore, the impact of tourism development on residents' subjective well-  
38  
39 being and happiness, should be considered.

40  
41  
42 In this study, we report that Tibetans living at 3500–4000 m had the best HRQoL. Moreover, participants  
43  
44 who were married, lived in urban areas, and engaged in physical activities 1–5 times/week had better HRQoL  
45  
46 compared with other high-altitudes. This could be attributed to Tibet's topography, population distribution,  
47  
48  
49  
50  
51  
52



1 and socioeconomic status. The TAR is a vast territory with a sparse population with high-altitude in the  
2  
3  
4 northwest and low in the southeast. The region can be divided into three regions based on altitude. The  
5  
6 Qiangtang Plateau in the north (> 5000 m), and the central basin region and Himalayan mountains (4000–  
7  
8 5000 m on average). The valleys of the middle and lower reaches of the Yarlung Zangbo River and the three  
9  
10 rivers in eastern Tibet have an altitude of 3000–4000 m, and 60% of the population is concentrated there. Of  
11  
12 the seven cities surveyed, Lhasa, Shannan, Qamdo, and Shigaze have an average altitude of 3500–4000 m  
13  
14 with their GDP ranking among the top four in Tibet according to the Seventh National Census in 2020. Similar  
15  
16 results have been reported previously with socioeconomic status significantly associated with higher  
17  
18 HRQoL[50]. Socioeconomic status is detrimental to health as it affects people’s living and working conditions  
19  
20 and restricts accessibility to medical care[51]. Moreover, socioeconomic status affects people’s psychological  
21  
22 state and cognition of the world around them[52]. During the few last decades, China has implemented strong  
23  
24 policies to facilitate economic development in the Qinghai-Tibet plateau (e.g., the Strategy of the  
25  
26 Development of China’s West). The implementation of supportive strategies should help improve  
27  
28 socioeconomic status in the future, including improving public infrastructure, medical service capacity, and  
29  
30 disease prevention improving HRQoL.  
31  
32  
33  
34  
35  
36  
37  
38

39  
40 This study had several limitations. First, this study did not recruit the same pool of participants in two  
41  
42 rounds of surveys, making it difficult to identify causal associations. However, the same cities were selected,  
43  
44 and the participants may partly overlap. Second, many studies have reported that EQ-5D-3L has more  
45  
46 significant ceiling effects than EQ-5D-5L. However, EQ-5D-3L is more suitable for use in large-scale  
47  
48 population surveys because of its small cognitive burden. Moreover, the comparison of the two rounds of  
49  
50 surveys indicated the overall changing trends of HRQoL derived from EQ-5D-3L.  
51  
52  
53  
54  
55

## 56 **Conclusion**

57  
58  
59 This study had several limitations. First, this study did not recruit the same pool of participants in two rounds  
60

1 of surveys, making it difficult to identify causal associations. However, the same cities were selected, and the  
2  
3 participants may partly overlap. Second, many studies have reported that EQ-5D-3L has more significant  
4  
5 ceiling effects than EQ-5D-5L. However, EQ-5D-3L is more suitable for use in large-scale population surveys  
6  
7 because of its small cognitive burden. Moreover, the comparison of the two rounds of surveys indicated the  
8  
9 overall changing trends of HRQoL derived from EQ-5D-3L.  
10  
11  
12  
13  
14  
15  
16  
17

## 18 **Acknowledgements**

19  
20  
21 We gratefully acknowledge the contribution of the investigators from Preventive Medicine at Medical College  
22  
23 of Tibet University, and we also thank all the participants who participated in the study.  
24  
25

## 26 **Funding statement**

27  
28  
29 This work was supported by the Sixth National Health Service Survey Project in Tibet (grant number  
30  
31 18080027); and China Medical Board (grant number 11-086).  
32  
33  
34  
35

## 36 **Competing interest statement**

37  
38  
39 All authors declare no competing interests.  
40  
41

## 42 **Author Contributions**

43  
44  
45 SPL and ZXDW have substantial contributions to conception and design, acquisition of funding, data and  
46  
47 interpretation of data. CDZG and ZXCM were involved in the acquisition of data. LD, ZS and CFL were  
48  
49 responsible for the data analysis and interpretation of data. LD drafted the manuscript, ZS, CDZG, ZXCM  
50  
51 and CFL revised it critically for important intellectual content, LD and SPL was responsible for the decision  
52  
53 to submit the manuscript, and all authors contributed to final approval of the manuscript.  
54  
55  
56  
57  
58

## 59 **Ethics statements**

## Patient consent for publication

Not applicable.

## Ethics approval

This study involves human participants and was approved. This study was conducted with the approval of the National Health Commission of the People's Republic of China and the Health Commission of Tibet autonomous region.

## Data availability statement

Data are available upon reasonable request. We have included all the data produced in the present work in the manuscript. Note that the raw data used in the study were obtained from National Health Service Surveys of China. We are unable to attach all the raw data for each participant in this paper due to the ethical restrictions.

## References

1. Cohen JE, Small C. Hypsographic demography: the distribution of human population by altitude, *Proc Natl Acad Sci U S A* 1998;95:14009-14014.
2. Hou R, Mi Y, Xu Q et al. Oral health survey and oral health questionnaire for high school students in Tibet, China, *Head & Face Medicine* 2014;10:17.
3. Beall, CM. An ecology of high-altitude infancy., *AMER J PHYS ANTHROPOL* 2006.
4. Mallet RT, Burtcher J, Richalet JP et al. Impact of High Altitude on Cardiovascular Health: Current Perspectives, *Vasc Health Risk Manag* 2021;17:317-335.
5. Kious BM, Bakian A, Zhao J et al. Altitude and risk of depression and anxiety: findings from the intern health study, *Int Rev Psychiatry* 2019;31:637-645.
6. Wang F, Liu S, Zhang Q et al. Prevalence of Depression in Older Nursing Home Residents in High and Low Altitude Regions: A Comparative Study, *Frontiers in Psychiatry* 2021;12:669234.
7. Song C, Chongsuvivatwong V, Wangdui S et al. Coverage and effectiveness of hypertension screening in different altitudes of Tibet autonomous region, *BMC PUBLIC HEALTH* 2021;21:33.
8. Mingji C, Onakpoya IJ, Perera R et al. Relationship between altitude and the prevalence of hypertension in Tibet: a systematic review, *HEART* 2015;101:1054-1060.
9. Tibet Autonomous Region Statistics Bureau (2021), 'Communiqué on Main Data of the Seventh National Population Census of Tibet Autonomous Region'.
10. Zheng Z. Research on the village public service system innovation of agricultural and pastoral areas in tibet--from the perspective of integrated anti-poverty development, *Ethnology Journal* 2012:34-43.

11. JieAnNaMu, Xu X, You H et al. Inequalities in health-related quality of life and the contribution from socioeconomic status: evidence from Tibet, China, *BMC PUBLIC HEALTH* 2020;20:630.
12. Graham C, Zhou S, Zhang J. Happiness and Health in China: The Paradox of Progress, *WORLD DEVELOPMENT* 2017; S305750X-S15308056X.
13. Huang L, Wang Z, Wang H et al. Nutrition transition and related health challenges over decades in China, *EUROPEAN JOURNAL OF CLINICAL NUTRITION* 2021;75:247-252.
14. Calvert M, Blazeby J, Altman DG et al. Reporting of Patient-Reported Outcomes in Randomized Trials, *Jama* 2013;309:814.
15. Karimi M, Brazier J. Health, Health-Related Quality of Life, and Quality of Life: What is the Difference? *PHARMACOECONOMICS* 2016; 34:645-649.
16. Ware JE. Health Status and Outcomes Assessment Tools, *MEDICAL CARE* 1992;30: S205-S209.
17. Devlin NJ, Brooks R. EQ-5D and the EuroQol Group: Past, Present and Future, *Appl Health Econ Health Policy* 2017;15:127-137.
18. Huang W, Yu H, Liu C et al. Assessing Health-Related Quality of Life of Chinese Adults in Heilongjiang Using EQ-5D-3L, *Int J Environ Res Public Health* 2017;14.
19. Si L, Shi L, Chen M et al. Establishing benchmark EQ-5D-3L population health state utilities and identifying their correlates in Gansu Province, China, *QUALITY OF LIFE RESEARCH* 2017;26:3049-3058.
20. Tan Z, Liang Y, Liu S et al. Health-related quality of life as measured with EQ-5D among populations with and without specific chronic conditions: a population-based survey in Shaanxi Province, China, *PLoS One* 2013;8: e65958.
21. Deng X, Dong P, Zhang L et al. Health-related quality of life in residents aged 18 years and older with and without disease: findings from the First Provincial Health Services Survey of Hunan, China, *BMJ Open* 2017;7: e15880.
22. Brooks R. EuroQol: the current state of play, *HEALTH POLICY* 1996;37:53-72.
23. Liu GG, Wu H, Li M et al. Chinese time trade-off values for EQ-5D health states, *VALUE IN HEALTH* 2014;17:597-604.
24. Zhuo L, Xu L, Ye J et al. Time Trade-Off Value Set for EQ-5D-3L Based on a Nationally Representative Chinese Population Survey, *VALUE IN HEALTH* 2018;21:1330-1337.
25. Liu GG, Guan H, Jin X et al. Rural population's preferences matter: a value set for the EQ-5D-3L health states for China's rural population, *Health Qual Life Outcomes* 2022;20:14.
26. Zhang RY, Wang W, Zhou HJ et al. A head-to-head comparison of the EQ-5D-3L index scores derived from the two EQ-5D-3L value sets for China, *Health Qual Life Outcomes* 2022;20:80.
27. Sun S, Chen J, Johannesson M et al. Regional differences in health status in China: population health-related quality of life results from the National Health Services Survey 2008, *HEALTH & PLACE* 2011;17:671-680.
28. Woolcott OO, Ader M, Bergman RN. Glucose homeostasis during short-term and prolonged exposure to high altitudes, *ENDOCRINE REVIEWS* 2015;36:149-173.
29. The Ministry of Labor and Personnel and the Ministry of Finance (1984), 'The Ministry of Labor and Personnel and the Ministry of Finance responded to the People's Government of Tibet Autonomous Region on issues concerning the implementation of temporary subsidies for workers in plateau areas'.
30. Pan CW, Zhang RY, Luo N et al. How the EQ-5D utilities are derived matters in Chinese diabetes patients: a comparison based on different EQ-5D scoring functions for China, *QUALITY OF LIFE RESEARCH* 2020;29:3087-3094.
31. Yao Q, Liu C, Zhang Y et al. Population norms for the EQ-5D-3L in China derived from the 2013 National Health Services Survey, *Journal of Global Health* 2021;11:8001.
32. Walters SJ, Brazier JE. Comparison of the minimally important difference for two health state utility measures: EQ-5D and SF-6D, *QUALITY OF LIFE RESEARCH* 2005;14:1523-1532.
33. Netzer N, Strohl K, Faulhaber M et al. Hypoxia-related altitude illnesses, *JOURNAL OF TRAVEL MEDICINE* 2013;20:247-255.
34. Crawford JE, Amaru R, Song J et al. Natural Selection on Genes Related to Cardiovascular Health in High-Altitude Adapted Andeans, *AMERICAN JOURNAL OF HUMAN GENETICS* 2017;101:752-767.
35. Deng R, Labasangzhu, Zhaxideji et al. Illness prevalence rate in Tibet, China: data from the 2018 National Health Service

Survey, BMC PUBLIC HEALTH 2020;20:955.

36. Li K, Liang Y, Sun Y et al. The relationship between polymorphisms at 17 gene sites and hypertension among the Aboriginal Tibetan people, BIOMEDICAL AND ENVIRONMENTAL SCIENCES 2012;25:526-532.
37. Wang J, Zhang L, Wang F et al. Prevalence, awareness, treatment, and control of hypertension in China: results from a national survey, AMERICAN JOURNAL OF HYPERTENSION 2014;27:1355-1361.
38. Chen Y, Zhang G, Chen Z et al. A warming climate may reduce health risks of hypoxia on the Qinghai-Tibet Plateau, Science Bulletin 2022;67:341-344.
39. Tian-Yi WU. Chronic mountain sickness on the Qinghai-Tibetan plateau, Chinese Medical Journal: English Edition 2005;118:8.
40. Golicki D, Niewada M, Jakubczyk M et al. Self-assessed health status in Poland: EQ-5D findings from the Polish valuation study, Pol Arch Med Wewn 2010;120:276-281.
41. Gamboa JL, Caceda R, Arregui A. Is depression the link between suicide and high altitude? HIGH ALTITUDE MEDICINE & BIOLOGY 2011; 12:403-404, 405.
42. Wang J, Zhou Y, Liang Y et al. A Large Sample Survey of Tibetan People on the Qinghai-Tibet Plateau: Current Situation of Depression and Risk Factors, Int J Environ Res Public Health 2019;17.
43. Ding Y, Shi B, Su G et al. Assessing Suitability of Human Settlements in High-Altitude Area Using a Comprehensive Index Method: A Case Study of Tibet, China, Sustainability 2021;13.
44. Li XY, Wu XY, Fu C et al. Effects of acute mild and moderate hypoxia on human mood state, Space Med Us Eng (Beijing) 2000;13:1-5.
45. Kim, Hyelin, Uysal et al. Life satisfaction and support for tourism development, Annals of tourism research: A social sciences journal 2015;50:84-97.
46. Vargas-Sanchez A, Plaza-Mejia MDLA, Porras-Bueno N. Understanding Residents' Attitudes toward the Development of Industrial Tourism in a Former Mining Community, Journal of Travel Research 2009;47:373-387.
47. Aref F. The Effects of Tourism on Quality of Life: A Case Study of Shiraz, Iran, Life ence Journal 2011;8:26-30.
48. Andereck, Kathleen L, Nyaupane et al. Exploring the Nature of Tourism and Quality of Life Perceptions among Residents., Journal of Travel Research 2011;11:25-34.
49. Andereck KL, Valentine KM, Knopf RC et al. Residents' perceptions of community tourism impacts, ANNALS OF TOURISM RESEARCH 2005;32:1056-1076.
50. Yao Q, Liu C, Zhang Y et al. Changes in health-related quality of life of Chinese populations measured by the EQ-5D-3 L: a comparison of the 2008 and 2013 National Health Services Surveys, Health Qual Life Outcomes 2019;17:43.
51. Jiang Y, Hesser JE. Associations between health-related quality of life and demographics and health risks. Results from Rhode Island's 2002 behavioral risk factor survey, Health Qual Life Outcomes 2006;4:14.
52. Matthews KA, Gallo LC. Psychological perspectives on pathways linking socioeconomic status and physical health, Annual Review of Psychology 2011;62:501-530.

**Table 1 Characteristics of the participants**

| Characteristics                         | 2013       |       | 2018       |       |
|-----------------------------------------|------------|-------|------------|-------|
|                                         | N          | %     | N          | %     |
| <b>Age</b>                              |            |       |            |       |
| 15-44 years                             | 5754       | 56.15 | 3159       | 49.08 |
| 45-64 years                             | 3363       | 32.82 | 2568       | 39.90 |
| ≥65 years                               | 1130       | 11.03 | 709        | 11.02 |
| <b>Gender</b>                           |            |       |            |       |
| Male                                    | 4766       | 46.51 | 2792       | 43.38 |
| Female                                  | 5481       | 53.49 | 3644       | 56.62 |
| <b>Educational attainment</b>           |            |       |            |       |
| Illiterate                              | 5841       | 57.00 | 3348       | 52.02 |
| Primary school                          | 3080       | 30.06 | 2143       | 33.30 |
| Junior high school and above            | 1326       | 12.94 | 945        | 14.68 |
| <b>Employment</b>                       |            |       |            |       |
| Employed                                | 8514       | 83.09 | 5228       | 81.23 |
| Retired                                 | 198        | 1.93  | 131        | 2.04  |
| Unemployed                              | 1535       | 14.98 | 1077       | 16.73 |
| <b>Marital status</b>                   |            |       |            |       |
| Single                                  | 1563       | 15.25 | 748        | 11.62 |
| Married                                 | 7718       | 75.32 | 5037       | 78.26 |
| Separated/divorced/windowed             | 966        | 9.43  | 651        | 10.11 |
| <b>Location</b>                         |            |       |            |       |
| Rural                                   | 8699       | 84.89 | 4988       | 77.50 |
| Urban                                   | 1548       | 15.11 | 1448       | 22.50 |
| Altitude, m (Mean ± SD)                 | 3838 ± 526 | -     | 3903 ± 495 | -     |
| <b>Diseased during the past 2 weeks</b> |            |       |            |       |
| Yes                                     | 1152       | 11.35 | 701        | 10.89 |
| No                                      | 9002       | 88.65 | 5735       | 89.11 |
| <b>Number of chronic diseases</b>       |            |       |            |       |
| 0                                       | 6726       | 65.64 | 3684       | 57.24 |
| 1                                       | 2634       | 25.71 | 1743       | 27.08 |
| ≥2                                      | 887        | 8.66  | 1009       | 15.68 |
| <b>Smoking</b>                          |            |       |            |       |
| Smoker                                  | 1424       | 13.90 | 724        | 11.25 |
| Ex-smoker                               | 487        | 4.75  | 238        | 3.70  |
| Non-smoker                              | 8336       | 81.35 | 5474       | 85.05 |
| <b>Weekly physical activities</b>       |            |       |            |       |
| Never exercised                         | 9437       | 92.28 | 4054       | 62.99 |
| 1-5 times                               | 511        | 5.00  | 1247       | 19.38 |
| ≥6 times                                | 279        | 2.73  | 1135       | 17.64 |

**Table 2 Reported health problems of participants**

| EQ-5D-3L                  | 2013 |       | 2018 |       | Total |       | $\chi^2$ | P-value |
|---------------------------|------|-------|------|-------|-------|-------|----------|---------|
|                           | N    | %     | N    | %     | N     | %     |          |         |
| <b>Mobility</b>           |      |       |      |       |       |       | 12.794   | 0.002   |
| No problem                | 8956 | 87.40 | 5544 | 86.14 | 14500 | 86.91 |          |         |
| Moderate problem          | 1221 | 11.92 | 865  | 13.44 | 2086  | 12.50 |          |         |
| Extreme problem           | 70   | 0.68  | 27   | 0.42  | 97    | 0.58  |          |         |
| <b>Self-care</b>          |      |       |      |       |       |       | 2.791    | 0.248   |
| No problem                | 9453 | 92.25 | 5891 | 91.53 | 15344 | 91.97 |          |         |
| Moderate problem          | 733  | 7.15  | 502  | 7.80  | 1235  | 7.40  |          |         |
| Extreme problem           | 61   | 0.60  | 43   | 0.67  | 104   | 0.62  |          |         |
| <b>Usual activities</b>   |      |       |      |       |       |       | 1.407    | 0.495   |
| No problem                | 9014 | 87.97 | 5624 | 87.38 | 14638 | 87.74 |          |         |
| Moderate problem          | 1077 | 10.51 | 714  | 11.09 | 1791  | 10.74 |          |         |
| Extreme problem           | 156  | 1.52  | 98   | 1.52  | 254   | 1.52  |          |         |
| <b>Pain/discomfort</b>    |      |       |      |       |       |       | 7.543    | 0.023   |
| No problem                | 8393 | 81.91 | 5283 | 82.09 | 13676 | 81.98 |          |         |
| Moderate problem          | 1750 | 17.08 | 1059 | 16.45 | 2809  | 16.84 |          |         |
| Extreme problem           | 104  | 1.01  | 94   | 1.46  | 198   | 1.19  |          |         |
| <b>Anxiety/depression</b> |      |       |      |       |       |       | 52.078   | <0.001  |
| No problem                | 9111 | 88.91 | 5479 | 85.13 | 14590 | 87.45 |          |         |
| Moderate problem          | 1047 | 10.22 | 874  | 13.58 | 1921  | 11.51 |          |         |
| Extreme problem           | 89   | 0.87  | 83   | 1.29  | 172   | 1.03  |          |         |

**Table 3 Health utility score stratified by different years and altitudes**

| Characteristics               | Different Years (SD) |              |                 | Different altitudes (SD) |              |              |                 |
|-------------------------------|----------------------|--------------|-----------------|--------------------------|--------------|--------------|-----------------|
|                               | 2013                 | 2018         | <i>P</i> -value | < 3500m                  | 3500-4000m   | >4000m       | <i>P</i> -value |
| <b>Age</b>                    |                      |              |                 |                          |              |              |                 |
| 15-44 years                   | 0.987(0.049)         | 0.987(0.041) | 0.003           | 0.985(0.050)             | 0.98(0.044)  | 0.985(0.047) | <0.001          |
| 45-64 years                   | 0.962(0.078)         | 0.959(0.076) | 0.013           | 0.954(0.082)             | 0.968(0.072) | 0.954(0.081) | <0.001          |
| ≥65 years                     | 0.900(0.133)         | 0.899(0.139) | 0.973           | 0.900(0.126)             | 0.915(0.129) | 0.878(0.146) | <0.001          |
| <b>Gender</b>                 |                      |              |                 |                          |              |              |                 |
| Male                          | 0.975(0.071)         | 0.973(0.070) | 0.002           | 0.971(0.072)             | 0.978(0.071) | 0.972(0.070) | <0.001          |
| Female                        | 0.964(0.083)         | 0.961(0.082) | <0.001          | 0.959(0.083)             | 0.970(0.074) | 0.955(0.092) | <0.001          |
| <b>Employment</b>             |                      |              |                 |                          |              |              |                 |
| Employed                      | 0.977(0.064)         | 0.976(0.058) | <0.001          | 0.974(0.065)             | 0.980(0.059) | 0.975(0.063) | <0.001          |
| Retired                       | 0.945(0.116)         | 0.965(0.057) | 0.493           | 0.937(0.118)             | 0.977(0.051) | 0.918(0.131) | <0.001          |
| Unemployed                    | 0.926(0.117)         | 0.918(0.128) | 0.011           | 0.903(0.118)             | 0.944(0.113) | 0.899(0.131) | <0.001          |
| <b>Educational attainment</b> |                      |              |                 |                          |              |              |                 |
| Illiterate                    | 0.959(0.088)         | 0.956(0.088) | <0.001          | 0.956(0.087)             | 0.962(0.086) | 0.956(0.090) | <0.001          |
| Primary school                | 0.979(0.064)         | 0.971(0.069) | <0.001          | 0.969(0.074)             | 0.979(0.062) | 0.973(0.068) | <0.001          |
| Junior high school and above  | 0.990(0.046)         | 0.991(0.038) | 0.180           | 0.985(0.045)             | 0.993(0.039) | 0.988(0.050) | <0.001          |
| <b>Marital status</b>         |                      |              |                 |                          |              |              |                 |
| Single                        | 0.975(0.086)         | 0.979(0.068) | 0.182           | 0.973(0.090)             | 0.978(0.076) | 0.976(0.083) | 0.579           |
| Married                       | 0.973(0.069)         | 0.969(0.069) | <0.001          | 0.966(0.075)             | 0.977(0.065) | 0.968(0.070) | <0.001          |
| Separated/divorced/windowed   | 0.928(0.111)         | 0.925(0.124) | 0.832           | 0.936(0.090)             | 0.940(0.107) | 0.904(0.135) | <0.001          |
| <b>Location</b>               |                      |              |                 |                          |              |              |                 |
| Rural                         | 0.967(0.080)         | 0.966(0.077) | 0.001           | 0.966(0.076)             | 0.970(0.077) | 0.963(0.081) | <0.001          |



1  
2  
3  
4  
5  
6  
7  
8  
9  
10  
11  
12  
13  
14  
15  
16  
17  
18  
19  
20  
21  
22  
23  
24  
25  
26  
27  
28  
29  
30  
31  
32  
33  
34  
35  
36  
37  
38  
39  
40  
41  
42  
43  
44  
45  
46

|                                         |              |              |        |              |              |              |        |
|-----------------------------------------|--------------|--------------|--------|--------------|--------------|--------------|--------|
| Urban                                   | 0.980(0.065) | 0.967(0.080) | <0.001 | 0.951(0.094) | 0.985(0.053) | 0.960(0.092) | <0.001 |
| <b>Altitude</b>                         |              |              |        |              |              |              |        |
| < 3500m                                 | 0.966(0.078) | 0.961(0.079) | <0.001 | -            | -            | -            | -      |
| 3500-4000m                              | 0.975(0.072) | 0.970(0.073) | <0.001 | -            | -            | -            | -      |
| >4000m                                  | 0.963(0.084) | 0.963(0.081) | 0.411  | -            | -            | -            | -      |
| <b>Diseased during the past 2 weeks</b> |              |              |        |              |              |              |        |
| Yes                                     | 0.933(0.111) | 0.934(0.100) | 0.303  | 0.943(0.094) | 0.943(0.101) | 0.938(0.102) | 0.659  |
| No                                      | 0.974(0.072) | 0.970(0.073) | <0.001 | 0.980(0.060) | 0.987(0.048) | 0.981(0.059) | <0.001 |
| <b>Number of chronic diseases</b>       |              |              |        |              |              |              |        |
| 0                                       | 0.983(0.057) | 0.986(0.049) | 0.331  | 0.980(0.060) | 0.987(0.048) | 0.981(0.059) | <0.001 |
| 1                                       | 0.950(0.097) | 0.951(0.091) | 0.663  | 0.950(0.088) | 0.952(0.096) | 0.949(0.096) | 0.041  |
| ≥2                                      | 0.920(0.113) | 0.919(0.106) | 0.223  | 0.926(0.104) | 0.920(0.110) | 0.915(0.111) | 0.115  |
| <b>Smoking</b>                          |              |              |        |              |              |              |        |
| Smoker                                  | 0.985(0.056) | 0.984(0.048) | 0.094  | 0.979(0.071) | 0.986(0.050) | 0.985(0.046) | 0.060  |
| Ex-smoker                               | 0.965(0.073) | 0.954(0.089) | 0.146  | 0.972(0.056) | 0.970(0.064) | 0.953(0.091) | 0.004  |
| Non-smoker                              | 0.967(0.081) | 0.964(0.080) | <0.001 | 0.962(0.080) | 0.971(0.076) | 0.961(0.085) | <0.001 |
| <b>Weekly physical activities</b>       |              |              |        |              |              |              |        |
| Never exercised                         | 0.969(0.079) | 0.961(0.086) | <0.001 | 0.965(0.080) | 0.971(0.078) | 0.962(0.085) | <0.001 |
| 1–5 times                               | 0.967(0.071) | 0.973(0.066) | 0.004  | 0.956(0.075) | 0.980(0.058) | 0.964(0.077) | <0.001 |
| ≥6 times                                | 0.985(0.044) | 0.977(0.051) | <0.001 | 0.970(0.056) | 0.984(0.042) | 0.972(0.060) | <0.001 |
| <b>Total</b>                            | 0.969(0.078) | 0.966(0.077) | <0.001 | 0.965(0.078) | 0.973(0.073) | 0.963(0.083) | <0.001 |

Table 4 Tobit regression analysis on the EQ-5D-3L HSU scores in different altitudes

| Characteristics                                     | Total         |         | <3500m        |         | 3500-4000m    |         | >4000m        |         |
|-----------------------------------------------------|---------------|---------|---------------|---------|---------------|---------|---------------|---------|
|                                                     | Coe(SE)       | P-value | Coe(SE)       | P-value | Coe(SE)       | P-value | Coe(SE)       | P-value |
| <b>Age years (ref.:15-44 years)</b>                 |               |         |               |         |               |         |               |         |
| 45-64 years                                         | -0.071(0.004) | <0.001  | -0.071(0.008) | <0.001  | -0.064(0.007) | <0.001  | -0.079(0.007) | <0.001  |
| ≥65 years                                           | -0.142(0.006) | <0.001  | -0.131(0.012) | <0.001  | -0.131(0.010) | <0.001  | -0.154(0.010) | <0.001  |
| <b>Gender (ref.: male)</b>                          |               |         |               |         |               |         |               |         |
| Female                                              | -0.025(0.004) | <0.001  | -0.020(0.008) | 0.009   | -0.022(0.006) | 0.001   | -0.035(0.006) | <0.001  |
| <b>Educational attainment (ref.: illiterate)</b>    |               |         |               |         |               |         |               |         |
| Primary school                                      | 0.016(0.004)  | <0.001  | 0.002(0.008)  | 0.774   | 0.021(0.006)  | 0.001   | 0.014(0.007)  | 0.044   |
| Junior high school and above                        | 0.054(0.007)  | <0.001  | 0.043(0.012)  | 0.001   | 0.061(0.011)  | <0.001  | 0.049(0.013)  | <0.001  |
| <b>Employment (ref.: employed)</b>                  |               |         |               |         |               |         |               |         |
| Retired                                             | -0.033(0.012) | 0.007   | -0.048(0.020) | 0.019   | -0.013(0.021) | 0.549   | -0.030(0.027) | 0.263   |
| Unemployed                                          | -0.073(0.005) | <0.001  | -0.094(0.002) | <0.001  | -0.073(0.008) | <0.001  | -0.075(0.008) | <0.001  |
| <b>Marital status (ref.: single)</b>                |               |         |               |         |               |         |               |         |
| Married                                             | 0.017(0.006)  | 0.003   | 0.005(0.013)  | 0.714   | 0.021(0.009)  | 0.018   | 0.017(0.010)  | 0.092   |
| Separated/divorced/windowed                         | -0.008(0.008) | 0.311   | -0.002(0.016) | 0.905   | -0.004(0.012) | 0.755   | -0.019(0.013) | 0.142   |
| <b>Location (ref.: rural)</b>                       |               |         |               |         |               |         |               |         |
| Urban                                               | 0.038(0.005)  | <0.001  | 0.008(0.014)  | 0.592   | 0.078(0.008)  | <0.001  | -0.004(0.008) | 0.583   |
| <b>Diseased during the past 2 weeks (ref.: Yes)</b> |               |         |               |         |               |         |               |         |
| No                                                  | 0.041(0.005)  | <0.001  | 0.030(0.009)  | 0.001   | 0.062(0.009)  | <0.001  | 0.033(0.008)  | <0.001  |
| <b>Number of chronic diseases (ref.: 0)</b>         |               |         |               |         |               |         |               |         |
| 1                                                   | -0.084(0.004) | <0.001  | -0.065(0.008) | <0.001  | -0.098(0.006) | <0.001  | -0.072(0.007) | <0.001  |
| ≥2                                                  | -0.128(0.005) | <0.001  | -0.096(0.010) | <0.001  | -0.146(0.009) | <0.001  | -0.118(0.008) | <0.001  |

1  
2  
3  
4  
5  
6  
7  
8  
9  
10  
11  
12  
13  
14  
15  
16  
17  
18  
19  
20  
21  
22  
23  
24  
25  
26  
27  
28  
29  
30  
31  
32  
33  
34  
35  
36  
37  
38  
39  
40  
41  
42  
43  
44  
45  
46

|                                                           |               |        |               |       |               |        |               |        |
|-----------------------------------------------------------|---------------|--------|---------------|-------|---------------|--------|---------------|--------|
| <b>Smoking (ref.: smoker)</b>                             |               |        |               |       |               |        |               |        |
| Ex-smoker                                                 | -0.036(0.010) | <0.001 | 0.013(0.021)  | 0.536 | -0.022(0.007) | 0.197  | -0.058(0.015) | <0.001 |
| Non-smoker                                                | -0.012(0.006) | 0.065  | -0.024(0.012) | 0.052 | -0.009(0.010) | 0.375  | -0.008(0.011) | 0.505  |
| <b>Weekly physical activities (ref.: never exercised)</b> |               |        |               |       |               |        |               |        |
| 1–5 times                                                 | 0.026(0.006)  | <0.001 | 0.018(0.012)  | 0.121 | 0.036(0.009)  | <0.001 | 0.006(0.011)  | 0.595  |

For peer review only

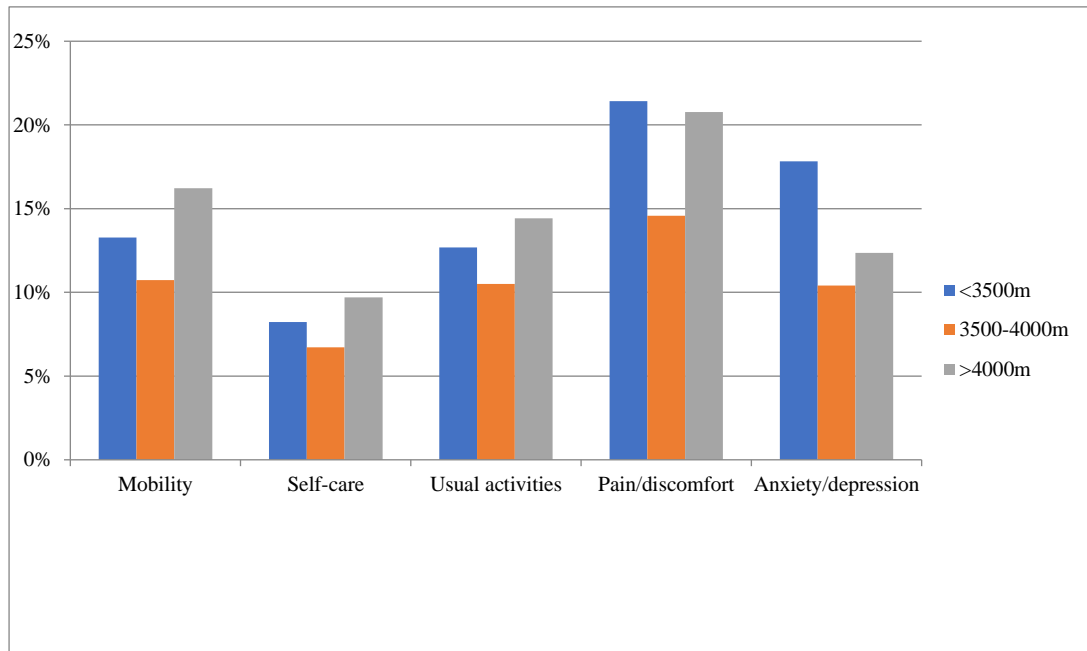

Figure 1 Proportions of problems reported on each EQ-5D-3L dimension by altitude

Peer review only

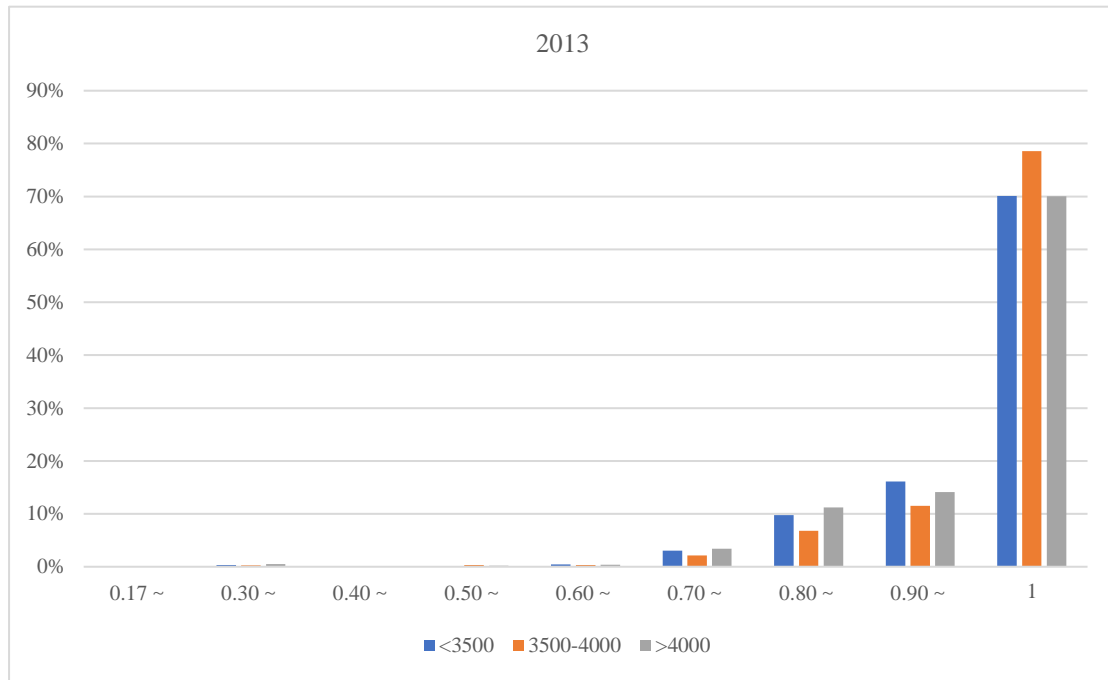

Figure 2a Distribution of health utility scores based on the EQ-5D-3L values set for China in 2013

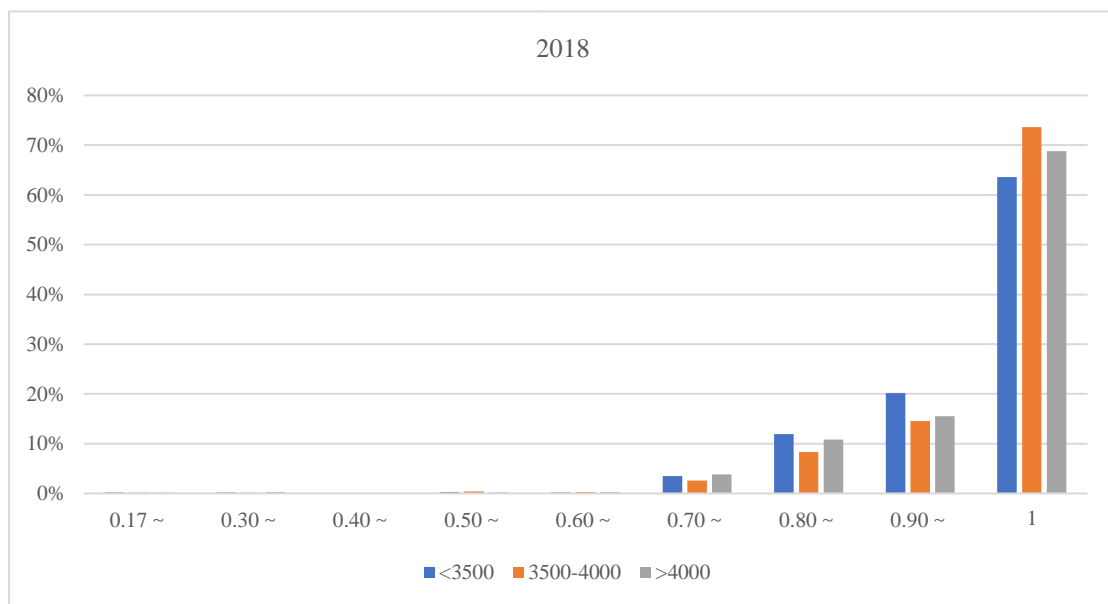

Figure 2b Distribution of health utility scores based on the EQ-5D-3L values set for China in 2018

**Supplementary Table 1 Tobit regression analysis on the EQ-5D-3L HSU scores in different altitudes using 3L<sub>2022</sub> value set**

| Characteristics                                     | Total  |       |         | <3500m |       |         | 3500-4000m |       |         | >4000m |       |         |
|-----------------------------------------------------|--------|-------|---------|--------|-------|---------|------------|-------|---------|--------|-------|---------|
|                                                     | Coe    | SE    | P-value | Coe    | SE    | P-value | Coe        | SE    | P-value | Coe    | SE    | P-value |
| <b>Age years (ref.:15-44 years)</b>                 |        |       |         |        |       |         |            |       |         |        |       |         |
| 45-64 years                                         | -0.032 | 0.002 | <0.001  | -0.040 | 0.005 | <0.001  | -0.027     | 0.003 | <0.001  | -0.039 | 0.004 | <0.001  |
| ≥65 years                                           | -0.113 | 0.004 | <0.001  | -0.111 | 0.009 | <0.001  | -0.096     | 0.005 | <0.001  | -0.136 | 0.007 | <0.001  |
| <b>Gender (ref.: male)</b>                          |        |       |         |        |       |         |            |       |         |        |       |         |
| Female                                              | -0.011 | 0.002 | <0.001  | -0.012 | 0.005 | 0.017   | -0.006     | 0.003 | 0.071   | -0.021 | 0.004 | <0.001  |
| <b>Educational attainment (ref.: illiterate)</b>    |        |       |         |        |       |         |            |       |         |        |       |         |
| Primary school                                      | 0.011  | 0.002 | <0.001  | 0.002  | 0.005 | 0.687   | 0.012      | 0.003 | <0.001  | 0.007  | 0.004 | 0.115   |
| Junior high school and above                        | 0.014  | 0.003 | <0.001  | 0.022  | 0.007 | 0.003   | 0.010      | 0.004 | 0.025   | 0.012  | 0.007 | 0.083   |
| <b>Employment (ref.: employed)</b>                  |        |       |         |        |       |         |            |       |         |        |       |         |
| Retired                                             | -0.008 | 0.007 | 0.301   | -0.025 | 0.015 | 0.086   | 0.011      | 0.010 | 0.282   | -0.030 | 0.020 | 0.133   |
| Unemployed                                          | -0.060 | 0.003 | <0.001  | -0.094 | 0.008 | <0.001  | -0.049     | 0.004 | <0.001  | -0.072 | 0.005 | <0.001  |
| <b>Marital status (ref.: single)</b>                |        |       |         |        |       |         |            |       |         |        |       |         |
| Married                                             | 0.017  | 0.003 | <0.001  | 0.017  | 0.008 | 0.027   | 0.018      | 0.004 | <0.001  | 0.016  | 0.006 | 0.005   |
| Separated/divorced/windowed                         | -0.004 | 0.004 | 0.342   | 0.011  | 0.011 | 0.327   | 0.001      | 0.006 | 0.931   | -0.020 | 0.008 | 0.016   |
| <b>Location (ref.: rural)</b>                       |        |       |         |        |       |         |            |       |         |        |       |         |
| Urban                                               | 0.020  | 0.003 | <0.001  | 0.004  | 0.010 | 0.651   | 0.029      | 0.004 | <0.001  | -0.003 | 0.005 | 0.475   |
| <b>Diseased during the past 2 weeks (ref.: Yes)</b> |        |       |         |        |       |         |            |       |         |        |       |         |
| No                                                  | 0.036  | 0.003 | <0.001  | 0.028  | 0.007 | <0.001  | 0.048      | 0.005 | <0.001  | 0.027  | 0.005 | <0.001  |
| <b>Number of chronic diseases (ref.: 0)</b>         |        |       |         |        |       |         |            |       |         |        |       |         |
| 1                                                   | -0.039 | 0.002 | <0.001  | -0.030 | 0.006 | <0.001  | -0.045     | 0.003 | <0.001  | -0.030 | 0.004 | <0.001  |
| ≥2                                                  | -0.083 | 0.003 | <0.001  | -0.063 | 0.008 | <0.001  | -0.093     | 0.005 | <0.001  | -0.072 | 0.006 | <0.001  |
| <b>Smoking (ref.: smoker)</b>                       |        |       |         |        |       |         |            |       |         |        |       |         |

1  
2  
3  
4  
5  
6  
7  
8  
9  
10  
11  
12  
13  
14  
15  
16  
17  
18  
19  
20  
21  
22  
23  
24  
25  
26  
27  
28  
29  
30  
31  
32  
33  
34  
35  
36  
37  
38  
39  
40  
41  
42  
43  
44  
45  
46

|                                                           |        |       |        |        |       |       |        |       |        |        |       |       |
|-----------------------------------------------------------|--------|-------|--------|--------|-------|-------|--------|-------|--------|--------|-------|-------|
| Ex-smoker                                                 | -0.012 | 0.005 | 0.029  | 0.015  | 0.014 | 0.274 | 0.001  | 0.008 | 0.935  | -0.028 | 0.009 | 0.002 |
| Non-smoker                                                | -0.003 | 0.003 | 0.314  | -0.009 | 0.007 | 0.214 | -0.002 | 0.004 | 0.669  | -0.002 | 0.006 | 0.800 |
| <b>Weekly physical activities (ref.: never exercised)</b> |        |       |        |        |       |       |        |       |        |        |       |       |
| 1–5 times                                                 | 0.019  | 0.003 | <0.001 | 0.009  | 0.008 | 0.241 | 0.024  | 0.004 | <0.001 | 0.003  | 0.006 | 0.664 |
| ≥6 times                                                  | 0.028  | 0.004 | <0.001 | 0.026  | 0.009 | 0.007 | 0.026  | 0.005 | <0.001 | 0.022  | 0.007 | 0.002 |

Note: Coe, coefficient; SE, standard error.

For peer review only

Supplementary Table 2 Characteristics of the participants in different altitudes

| Characteristics               | 2013  |       |        |       |            |       |        |       |             | 2018  |       |        |       |            |       |        |       |             |        |
|-------------------------------|-------|-------|--------|-------|------------|-------|--------|-------|-------------|-------|-------|--------|-------|------------|-------|--------|-------|-------------|--------|
|                               | Total |       | <3500m |       | 3500-4000m |       | >4000m |       | P-<br>value | Total |       | <3500m |       | 3500-4000m |       | >4000m |       | P-<br>value |        |
|                               | N     | %     | N      | %     | N          | %     | N      | %     |             | N     | %     | N      | %     | N          | %     | N      | %     |             |        |
| <b>Age</b>                    |       |       |        |       |            |       |        |       |             |       |       |        |       |            |       |        |       |             |        |
| 15-44 years                   | 5754  | 56.15 | 1249   | 56.29 | 2674       | 55.50 | 1831   | 57.00 | 0.150       | 3159  | 49.08 | 527    | 46.93 | 1361       | 46.40 | 1271   | 53.40 | <0.001      |        |
| 45-64 years                   | 3363  | 32.82 | 740    | 33.30 | 1619       | 33.60 | 1004   | 31.30 |             | 2568  | 39.90 | 469    | 41.76 | 1240       | 42.30 | 859    | 36.10 |             |        |
| ≥65 years                     | 1130  | 11.03 | 230    | 10.37 | 523        | 10.90 | 377    | 11.74 |             | 709   | 11.02 | 127    | 11.31 | 332        | 11.32 | 250    | 10.50 |             |        |
| <b>Gender</b>                 |       |       |        |       |            |       |        |       | 0.571       |       |       |        |       |            |       |        |       |             | 0.068  |
| Male                          | 4766  | 46.51 | 1047   | 47.18 | 2214       | 45.97 | 1505   | 46.86 |             | 2792  | 43.38 | 513    | 45.70 | 1230       | 41.90 | 1049   | 44.10 |             |        |
| Female                        | 5481  | 53.49 | 1172   | 52.82 | 2602       | 54.03 | 1707   | 53.14 |             | 3644  | 56.62 | 610    | 54.30 | 1703       | 58.10 | 1331   | 55.92 |             |        |
| <b>Educational attainment</b> |       |       |        |       |            |       |        |       | <0.001      |       |       |        |       |            |       |        |       |             | <0.001 |
| Illiterate                    | 5841  | 57.00 | 1217   | 54.84 | 2392       | 49.70 | 2232   | 69.49 |             | 3348  | 52.02 | 550    | 48.98 | 1238       | 42.20 | 1560   | 65.50 |             |        |
| Primary school                | 3080  | 30.06 | 674    | 30.40 | 1663       | 34.50 | 743    | 23.13 |             | 2143  | 33.30 | 421    | 37.50 | 1164       | 39.70 | 558    | 23.45 |             |        |
| Junior high school and above  | 1326  | 12.94 | 328    | 14.80 | 761        | 15.80 | 237    | 7.40  |             | 945   | 14.68 | 152    | 13.50 | 531        | 18.10 | 262    | 11.00 |             |        |
| <b>Employment</b>             |       |       |        |       |            |       |        |       | <0.001      |       |       |        |       |            |       |        |       |             | <0.001 |
| Employed                      | 8514  | 83.09 | 1911   | 86.12 | 3975       | 82.54 | 2628   | 81.80 |             | 5228  | 81.23 | 932    | 83.00 | 2240       | 76.40 | 2056   | 86.39 |             |        |
| Retired                       | 198   | 1.93  | 89     | 4.01  | 83         | 1.72  | 26     | 0.81  |             | 131   | 2.04  | 39     | 3.47  | 71         | 2.40  | 21     | 0.88  |             |        |
| Unemployed                    | 1535  | 14.98 | 219    | 9.87  | 758        | 15.74 | 558    | 17.37 |             | 1077  | 16.73 | 152    | 13.54 | 622        | 21.21 | 303    | 12.70 |             |        |
| <b>Marital status</b>         |       |       |        |       |            |       |        |       | <0.001      |       |       |        |       |            |       |        |       |             | <0.001 |
| Single                        | 1563  | 15.25 | 291    | 13.10 | 810        | 16.82 | 462    | 14.38 |             | 748   | 11.62 | 101    | 8.99  | 366        | 12.50 | 281    | 11.80 |             |        |
| Married                       | 7718  | 75.32 | 1754   | 79.00 | 3553       | 73.80 | 2411   | 75.06 |             | 5037  | 78.26 | 929    | 82.70 | 2240       | 76.40 | 1868   | 78.50 |             |        |
| Separated/divorced/windowed   | 966   | 9.43  | 174    | 7.84  | 453        | 9.41  | 339    | 10.60 |             | 651   | 10.11 | 93     | 8.30  | 327        | 11.15 | 231    | 9.70  |             |        |
| <b>Location</b>               |       |       |        |       |            |       |        |       | <0.001      |       |       |        |       |            |       |        |       |             | <0.001 |
| Rural                         | 8699  | 84.89 | 1988   | 89.59 | 3733       | 77.51 | 2978   | 92.71 |             | 4988  | 77.50 | 1036   | 92.30 | 2250       | 76.70 | 1702   | 71.50 |             |        |



1  
2  
3  
4  
5  
6  
7  
8  
9  
10  
11  
12  
13  
14  
15  
16  
17  
18  
19  
20  
21  
22  
23  
24  
25  
26  
27  
28  
29  
30  
31  
32  
33  
34  
35  
36  
37  
38  
39  
40  
41  
42  
43  
44  
45  
46

|                                         |      |       |      |       |      |       |      |       |        |      |       |      |       |      |       |      |        |
|-----------------------------------------|------|-------|------|-------|------|-------|------|-------|--------|------|-------|------|-------|------|-------|------|--------|
| Urban                                   | 1548 | 15.11 | 231  | 10.41 | 1083 | 22.49 | 234  | 7.29  |        | 1448 | 22.50 | 87   | 7.75  | 683  | 23.30 | 678  | 28.50  |
| <b>Diseased during the past 2 weeks</b> |      |       |      |       |      |       |      |       | <0.001 |      |       |      |       |      |       |      | 0.659  |
| Yes                                     | 1152 | 11.35 | 380  | 17.19 | 321  | 6.78  | 451  | 14.07 |        | 701  | 10.89 | 121  | 10.77 | 310  | 10.57 | 270  | 11.30  |
| No                                      | 9002 | 88.65 | 1830 | 82.81 | 4417 | 93.22 | 2755 | 85.90 |        | 5735 | 89.11 | 1002 | 89.20 | 2623 | 89.40 | 2110 | 88.70  |
| <b>Number of chronic diseases</b>       |      |       |      |       |      |       |      |       | <0.001 |      |       |      |       |      |       |      | <0.001 |
| 0                                       | 6726 | 65.64 | 1334 | 60.12 | 3415 | 70.91 | 1977 | 61.60 |        | 3684 | 57.24 | 614  | 54.70 | 1834 | 62.50 | 1236 | 51.90  |
| 1                                       | 2634 | 25.71 | 631  | 28.40 | 1100 | 22.80 | 903  | 28.10 |        | 1743 | 27.08 | 319  | 28.40 | 712  | 24.30 | 712  | 29.92  |
| ≥2                                      | 887  | 8.66  | 254  | 11.40 | 301  | 6.30  | 332  | 10.30 |        | 1009 | 15.68 | 190  | 16.90 | 387  | 13.20 | 432  | 18.20  |
| <b>Smoking</b>                          |      |       |      |       |      |       |      |       | <0.001 |      |       |      |       |      |       |      | <0.001 |
| Smoker                                  | 1424 | 13.90 | 298  | 13.43 | 786  | 16.30 | 340  | 10.60 |        | 724  | 11.25 | 142  | 12.60 | 361  | 12.30 | 221  | 9.30   |
| Ex-smoker                               | 487  | 4.75  | 84   | 3.80  | 163  | 3.40  | 240  | 7.50  |        | 238  | 3.70  | 36   | 3.20  | 74   | 2.50  | 128  | 5.40   |
| Non-smoker                              | 8336 | 81.35 | 1837 | 82.80 | 3867 | 80.29 | 2632 | 81.90 |        | 5474 | 85.05 | 945  | 84.10 | 2498 | 85.20 | 2031 | 85.30  |
| <b>Weekly physical activities</b>       |      |       |      |       |      |       |      |       | <0.001 |      |       |      |       |      |       |      | <0.001 |
| Never exercised                         | 9437 | 92.28 | 2046 | 92.29 | 4302 | 89.64 | 3089 | 96.20 |        | 4054 | 62.99 | 755  | 67.20 | 1648 | 56.19 | 1651 | 69.37  |
| 1–5 times                               | 511  | 5.00  | 127  | 5.73  | 303  | 6.31  | 81   | 2.50  |        | 1247 | 19.38 | 185  | 16.50 | 687  | 23.40 | 375  | 15.80  |
| ≥6 times                                | 279  | 2.73  | 44   | 2.00  | 194  | 4.04  | 41   | 1.30  |        | 1135 | 17.64 | 183  | 16.30 | 598  | 20.40 | 354  | 14.87  |

# Reporting checklist for cross sectional study.

Based on the STROBE cross sectional guidelines.

## Instructions to authors

Complete this checklist by entering the page numbers from your manuscript where readers will find each of the items listed below.

Your article may not currently address all the items on the checklist. Please modify your text to include the missing information. If you are certain that an item does not apply, please write "n/a" and provide a short explanation.

Upload your completed checklist as an extra file when you submit to a journal.

In your methods section, say that you used the STROBE cross sectional reporting guidelines, and cite them as:

von Elm E, Altman DG, Egger M, Pocock SJ, Gøtzsche PC, Vandenbroucke JP. The Strengthening the Reporting of Observational Studies in Epidemiology (STROBE) Statement: guidelines for reporting observational studies.

|                           |                     | Reporting Item                                                                                  | Page Number |
|---------------------------|---------------------|-------------------------------------------------------------------------------------------------|-------------|
| <b>Title and abstract</b> |                     |                                                                                                 |             |
| Title                     | <a href="#">#1a</a> | Indicate the study's design with a commonly used term in the title or the abstract              | P1,2        |
| Abstract                  | <a href="#">#1b</a> | Provide in the abstract an informative and balanced summary of what was done and what was found | P2          |
| <b>Introduction</b>       |                     |                                                                                                 |             |
| Background / rationale    | <a href="#">#2</a>  | Explain the scientific background and rationale for the investigation being reported            | P3-4        |
| Objectives                | <a href="#">#3</a>  | State specific objectives, including any prespecified hypotheses                                | P4          |
| <b>Methods</b>            |                     |                                                                                                 |             |
| Study design              | <a href="#">#4</a>  | Present key elements of study design early in the paper                                         | P4-5        |
| Setting                   | <a href="#">#5</a>  | Describe the setting, locations, and relevant dates, including periods of                       | p4          |

recruitment, exposure, follow-up, and data collection

|    |                      |                      |                                                                                                                                                                                                                                                                                   |
|----|----------------------|----------------------|-----------------------------------------------------------------------------------------------------------------------------------------------------------------------------------------------------------------------------------------------------------------------------------|
| 1  |                      |                      |                                                                                                                                                                                                                                                                                   |
| 2  |                      |                      |                                                                                                                                                                                                                                                                                   |
| 3  | Eligibility criteria | <a href="#">#6a</a>  | Give the eligibility criteria, and the sources and methods of selection of participants. p5                                                                                                                                                                                       |
| 4  |                      |                      |                                                                                                                                                                                                                                                                                   |
| 5  |                      |                      |                                                                                                                                                                                                                                                                                   |
| 6  |                      | <a href="#">#7</a>   | Clearly define all outcomes, exposures, predictors, potential confounders, and effect modifiers. Give diagnostic criteria, if applicable p5                                                                                                                                       |
| 7  |                      |                      |                                                                                                                                                                                                                                                                                   |
| 8  |                      |                      |                                                                                                                                                                                                                                                                                   |
| 9  |                      |                      |                                                                                                                                                                                                                                                                                   |
| 10 | Data sources /       | <a href="#">#8</a>   | For each variable of interest give sources of data and details of methods of assessment (measurement). Describe comparability of assessment methods if there is more than one group. Give information separately for for exposed and unexposed groups if applicable. p5           |
| 11 | measurement          |                      |                                                                                                                                                                                                                                                                                   |
| 12 |                      |                      |                                                                                                                                                                                                                                                                                   |
| 13 |                      |                      |                                                                                                                                                                                                                                                                                   |
| 14 |                      |                      |                                                                                                                                                                                                                                                                                   |
| 15 |                      |                      |                                                                                                                                                                                                                                                                                   |
| 16 |                      |                      |                                                                                                                                                                                                                                                                                   |
| 17 | Bias                 | <a href="#">#9</a>   | Describe any efforts to address potential sources of bias P5                                                                                                                                                                                                                      |
| 18 |                      |                      |                                                                                                                                                                                                                                                                                   |
| 19 | Study size           | <a href="#">#10</a>  | Explain how the study size was arrived at P5                                                                                                                                                                                                                                      |
| 20 |                      |                      |                                                                                                                                                                                                                                                                                   |
| 21 | Quantitative         | <a href="#">#11</a>  | Explain how quantitative variables were handled in the analyses. If applicable, describe which groupings were chosen, and why P6-7                                                                                                                                                |
| 22 | variables            |                      |                                                                                                                                                                                                                                                                                   |
| 23 |                      |                      |                                                                                                                                                                                                                                                                                   |
| 24 |                      |                      |                                                                                                                                                                                                                                                                                   |
| 25 | Statistical          | <a href="#">#12a</a> | Describe all statistical methods, including those used to control for confounding P7-8                                                                                                                                                                                            |
| 26 | methods              |                      |                                                                                                                                                                                                                                                                                   |
| 27 |                      |                      |                                                                                                                                                                                                                                                                                   |
| 28 |                      |                      |                                                                                                                                                                                                                                                                                   |
| 29 | Statistical          | <a href="#">#12b</a> | Describe any methods used to examine subgroups and interactions P7-8                                                                                                                                                                                                              |
| 30 | methods              |                      |                                                                                                                                                                                                                                                                                   |
| 31 |                      |                      |                                                                                                                                                                                                                                                                                   |
| 32 |                      |                      |                                                                                                                                                                                                                                                                                   |
| 33 | Statistical          | <a href="#">#12c</a> | Explain how missing data were addressed P8                                                                                                                                                                                                                                        |
| 34 | methods              |                      |                                                                                                                                                                                                                                                                                   |
| 35 |                      |                      |                                                                                                                                                                                                                                                                                   |
| 36 |                      |                      |                                                                                                                                                                                                                                                                                   |
| 37 | Statistical          | <a href="#">#12d</a> | If applicable, describe analytical methods taking account of sampling strategy P8                                                                                                                                                                                                 |
| 38 | methods              |                      |                                                                                                                                                                                                                                                                                   |
| 39 |                      |                      |                                                                                                                                                                                                                                                                                   |
| 40 |                      |                      |                                                                                                                                                                                                                                                                                   |
| 41 | Statistical          | <a href="#">#12e</a> | Describe any sensitivity analyses P8                                                                                                                                                                                                                                              |
| 42 | methods              |                      |                                                                                                                                                                                                                                                                                   |
| 43 |                      |                      |                                                                                                                                                                                                                                                                                   |
| 44 | <b>Results</b>       |                      |                                                                                                                                                                                                                                                                                   |
| 45 |                      |                      |                                                                                                                                                                                                                                                                                   |
| 46 |                      |                      |                                                                                                                                                                                                                                                                                   |
| 47 | Participants         | <a href="#">#13a</a> | Report numbers of individuals at each stage of study—eg numbers potentially eligible, examined for eligibility, confirmed eligible, included in the study, completing follow-up, and analysed. Give information separately for for exposed and unexposed groups if applicable. P8 |
| 48 |                      |                      |                                                                                                                                                                                                                                                                                   |
| 49 |                      |                      |                                                                                                                                                                                                                                                                                   |
| 50 |                      |                      |                                                                                                                                                                                                                                                                                   |
| 51 |                      |                      |                                                                                                                                                                                                                                                                                   |
| 52 |                      |                      |                                                                                                                                                                                                                                                                                   |
| 53 |                      |                      |                                                                                                                                                                                                                                                                                   |
| 54 |                      |                      |                                                                                                                                                                                                                                                                                   |
| 55 | Participants         | <a href="#">#13b</a> | Give reasons for non-participation at each stage P8                                                                                                                                                                                                                               |
| 56 |                      |                      |                                                                                                                                                                                                                                                                                   |
| 57 | Participants         | <a href="#">#13c</a> | Consider use of a flow diagram P8                                                                                                                                                                                                                                                 |
| 58 |                      |                      |                                                                                                                                                                                                                                                                                   |
| 59 |                      |                      |                                                                                                                                                                                                                                                                                   |
| 60 |                      |                      |                                                                                                                                                                                                                                                                                   |

|    |                    |                      |                                                                                                                                                                                                                   |        |
|----|--------------------|----------------------|-------------------------------------------------------------------------------------------------------------------------------------------------------------------------------------------------------------------|--------|
| 1  | Descriptive data   | <a href="#">#14a</a> | Give characteristics of study participants (eg demographic, clinical, social) and information on exposures and potential confounders. Give information separately for exposed and unexposed groups if applicable. | P8     |
| 2  |                    |                      |                                                                                                                                                                                                                   |        |
| 3  |                    |                      |                                                                                                                                                                                                                   |        |
| 4  |                    |                      |                                                                                                                                                                                                                   |        |
| 5  |                    |                      |                                                                                                                                                                                                                   |        |
| 6  | Descriptive data   | <a href="#">#14b</a> | Indicate number of participants with missing data for each variable of interest                                                                                                                                   | P8     |
| 7  |                    |                      |                                                                                                                                                                                                                   |        |
| 8  |                    |                      |                                                                                                                                                                                                                   |        |
| 9  |                    |                      |                                                                                                                                                                                                                   |        |
| 10 | Outcome data       | <a href="#">#15</a>  | Report numbers of outcome events or summary measures. Give information separately for exposed and unexposed groups if applicable.                                                                                 | P8     |
| 11 |                    |                      |                                                                                                                                                                                                                   |        |
| 12 |                    |                      |                                                                                                                                                                                                                   |        |
| 13 |                    |                      |                                                                                                                                                                                                                   |        |
| 14 | Main results       | <a href="#">#16a</a> | Give unadjusted estimates and, if applicable, confounder-adjusted estimates and their precision (eg, 95% confidence interval). Make clear which confounders were adjusted for and why they were included          | n/a    |
| 15 |                    |                      |                                                                                                                                                                                                                   |        |
| 16 |                    |                      |                                                                                                                                                                                                                   |        |
| 17 |                    |                      |                                                                                                                                                                                                                   |        |
| 18 |                    |                      |                                                                                                                                                                                                                   |        |
| 19 | Main results       | <a href="#">#16b</a> | Report category boundaries when continuous variables were categorized                                                                                                                                             | n/a    |
| 20 |                    |                      |                                                                                                                                                                                                                   |        |
| 21 | Main results       | <a href="#">#16c</a> | If relevant, consider translating estimates of relative risk into absolute risk for a meaningful time period                                                                                                      | n/a    |
| 22 |                    |                      |                                                                                                                                                                                                                   |        |
| 23 |                    |                      |                                                                                                                                                                                                                   |        |
| 24 |                    |                      |                                                                                                                                                                                                                   |        |
| 25 | Other analyses     | <a href="#">#17</a>  | Report other analyses done—e.g., analyses of subgroups and interactions, and sensitivity analyses                                                                                                                 | p8-10  |
| 26 |                    |                      |                                                                                                                                                                                                                   |        |
| 27 |                    |                      |                                                                                                                                                                                                                   |        |
| 28 |                    |                      |                                                                                                                                                                                                                   |        |
| 29 | <b>Discussion</b>  |                      |                                                                                                                                                                                                                   |        |
| 30 |                    |                      |                                                                                                                                                                                                                   |        |
| 31 | Key results        | <a href="#">#18</a>  | Summarise key results with reference to study objectives                                                                                                                                                          | P10    |
| 32 |                    |                      |                                                                                                                                                                                                                   |        |
| 33 |                    |                      |                                                                                                                                                                                                                   |        |
| 34 | Limitations        | <a href="#">#19</a>  | Discuss limitations of the study, taking into account sources of potential bias or imprecision. Discuss both direction and magnitude of any potential bias.                                                       | P14    |
| 35 |                    |                      |                                                                                                                                                                                                                   |        |
| 36 |                    |                      |                                                                                                                                                                                                                   |        |
| 37 |                    |                      |                                                                                                                                                                                                                   |        |
| 38 |                    |                      |                                                                                                                                                                                                                   |        |
| 39 | Interpretation     | <a href="#">#20</a>  | Give a cautious overall interpretation considering objectives, limitations, multiplicity of analyses, results from similar studies, and other relevant evidence.                                                  | P14-15 |
| 40 |                    |                      |                                                                                                                                                                                                                   |        |
| 41 |                    |                      |                                                                                                                                                                                                                   |        |
| 42 |                    |                      |                                                                                                                                                                                                                   |        |
| 43 |                    |                      |                                                                                                                                                                                                                   |        |
| 44 | Generalisability   | <a href="#">#21</a>  | Discuss the generalisability (external validity) of the study results                                                                                                                                             | P14-15 |
| 45 |                    |                      |                                                                                                                                                                                                                   |        |
| 46 |                    |                      |                                                                                                                                                                                                                   |        |
| 47 | <b>Other</b>       |                      |                                                                                                                                                                                                                   |        |
| 48 | <b>Information</b> |                      |                                                                                                                                                                                                                   |        |
| 49 |                    |                      |                                                                                                                                                                                                                   |        |
| 50 |                    |                      |                                                                                                                                                                                                                   |        |
| 51 | Funding            | <a href="#">#22</a>  | Give the source of funding and the role of the funders for the present study and, if applicable, for the original study on which the present article is based                                                     | P15    |
| 52 |                    |                      |                                                                                                                                                                                                                   |        |
| 53 |                    |                      |                                                                                                                                                                                                                   |        |
| 54 |                    |                      |                                                                                                                                                                                                                   |        |
| 55 |                    |                      |                                                                                                                                                                                                                   |        |

56 The STROBE checklist is distributed under the terms of the Creative Commons Attribution License CC-BY.

57 This checklist was completed on 14. February 2023 using <https://www.goodreports.org/>, a tool made by the

58 [EQUATOR Network](#) in collaboration with [Penelope.ai](#)

59 For peer review only - <http://bmjopen.bmj.com/site/about/guidelines.xhtml>

# BMJ Open

## Health-Related Quality of Life and its changes of Tibetan population in China: Based on the 2013 and 2018 National Health Services Surveys

|                                 |                                                                                                                                                                                                                                                                                                                                                                                                                                                                                                                                                                                                                                                                                                                                                                                                                                                                                                                                                                                                                                                                                                                                                                                                                                                                                                             |
|---------------------------------|-------------------------------------------------------------------------------------------------------------------------------------------------------------------------------------------------------------------------------------------------------------------------------------------------------------------------------------------------------------------------------------------------------------------------------------------------------------------------------------------------------------------------------------------------------------------------------------------------------------------------------------------------------------------------------------------------------------------------------------------------------------------------------------------------------------------------------------------------------------------------------------------------------------------------------------------------------------------------------------------------------------------------------------------------------------------------------------------------------------------------------------------------------------------------------------------------------------------------------------------------------------------------------------------------------------|
| Journal:                        | <i>BMJ Open</i>                                                                                                                                                                                                                                                                                                                                                                                                                                                                                                                                                                                                                                                                                                                                                                                                                                                                                                                                                                                                                                                                                                                                                                                                                                                                                             |
| Manuscript ID                   | bmjopen-2023-072854.R1                                                                                                                                                                                                                                                                                                                                                                                                                                                                                                                                                                                                                                                                                                                                                                                                                                                                                                                                                                                                                                                                                                                                                                                                                                                                                      |
| Article Type:                   | Original research                                                                                                                                                                                                                                                                                                                                                                                                                                                                                                                                                                                                                                                                                                                                                                                                                                                                                                                                                                                                                                                                                                                                                                                                                                                                                           |
| Date Submitted by the Author:   | 11-Jul-2023                                                                                                                                                                                                                                                                                                                                                                                                                                                                                                                                                                                                                                                                                                                                                                                                                                                                                                                                                                                                                                                                                                                                                                                                                                                                                                 |
| Complete List of Authors:       | <p>Dou, Lei; Shandong University, Centre for Health Management and Policy Research, School of Public Health, Cheeloo College of Medicine; NHC Key Lab of Health Economics and Policy Research (Shandong University)</p> <p>Shi, Zhao; Shandong University, Centre for Health Management and Policy Research, School of Public Health, Cheeloo College of Medicine; NHC Key Lab of Health Economics and Policy Research (Shandong University)</p> <p>Zhaxi, Cuomu; Tibet University, Medical College; Tibet University, Center of Tibetan Studies (Everest Research Institute)</p> <p>Cidan, Zhuoga; Tibet University, Medical College; Tibet University, Center of Tibetan Studies (Everest Research Institute)</p> <p>Li, Chaofan; Shandong University, Centre for Health Management and Policy Research, School of Public Health, Cheeloo College of Medicine; NHC Key Lab of Health Economics and Policy Research (Shandong University)</p> <p>Zhaxi, Dawa; Tibet University, Medical College; Tibet University, Center of Tibetan Studies (Everest Research Institute)</p> <p>Li, Shun-Ping; Shandong University, Centre for Health Management and Policy Research, School of Public Health, Cheeloo College of Medicine; NHC Key Lab of Health Economics and Policy Research (Shandong University)</p> |
| <b>Primary Subject Heading</b>: | Global health                                                                                                                                                                                                                                                                                                                                                                                                                                                                                                                                                                                                                                                                                                                                                                                                                                                                                                                                                                                                                                                                                                                                                                                                                                                                                               |
| Secondary Subject Heading:      | Public health, Health policy, Global health                                                                                                                                                                                                                                                                                                                                                                                                                                                                                                                                                                                                                                                                                                                                                                                                                                                                                                                                                                                                                                                                                                                                                                                                                                                                 |
| Keywords:                       | PUBLIC HEALTH, Quality of Life, China                                                                                                                                                                                                                                                                                                                                                                                                                                                                                                                                                                                                                                                                                                                                                                                                                                                                                                                                                                                                                                                                                                                                                                                                                                                                       |
|                                 |                                                                                                                                                                                                                                                                                                                                                                                                                                                                                                                                                                                                                                                                                                                                                                                                                                                                                                                                                                                                                                                                                                                                                                                                                                                                                                             |

SCHOLARONE™  
Manuscripts



I, the Submitting Author has the right to grant and does grant on behalf of all authors of the Work (as defined in the below author licence), an exclusive licence and/or a non-exclusive licence for contributions from authors who are: i) UK Crown employees; ii) where BMJ has agreed a CC-BY licence shall apply, and/or iii) in accordance with the terms applicable for US Federal Government officers or employees acting as part of their official duties; on a worldwide, perpetual, irrevocable, royalty-free basis to BMJ Publishing Group Ltd ("BMJ") its licensees and where the relevant Journal is co-owned by BMJ to the co-owners of the Journal, to publish the Work in this journal and any other BMJ products and to exploit all rights, as set out in our [licence](#).

The Submitting Author accepts and understands that any supply made under these terms is made by BMJ to the Submitting Author unless you are acting as an employee on behalf of your employer or a postgraduate student of an affiliated institution which is paying any applicable article publishing charge ("APC") for Open Access articles. Where the Submitting Author wishes to make the Work available on an Open Access basis (and intends to pay the relevant APC), the terms of reuse of such Open Access shall be governed by a Creative Commons licence – details of these licences and which [Creative Commons](#) licence will apply to this Work are set out in our licence referred to above.

Other than as permitted in any relevant BMJ Author's Self Archiving Policies, I confirm this Work has not been accepted for publication elsewhere, is not being considered for publication elsewhere and does not duplicate material already published. I confirm all authors consent to publication of this Work and authorise the granting of this licence.

## Title page

**Title:** Health-Related Quality of Life and its changes of Tibetan population in China: Based on the 2013 and 2018 National Health Services Surveys

**Authors:**

Lei Dou<sup>1,2,3</sup>, Zhao Shi<sup>1,2,3</sup>, Zhaxi Cuomu<sup>4,5</sup>, Cidan Zhuoga<sup>4,5</sup>, Chaofan Li<sup>1,2,3</sup>, Zhaxi Dawa<sup>4,5\*</sup>, Shunping Li<sup>1,2,3\*</sup>

**Affiliations:**

<sup>1</sup> Centre for Health Management and Policy Research, School of Public Health, Cheeloo College of Medicine, Shandong University, Jinan, China

<sup>2</sup> NHC Key Lab of Health Economics and Policy Research (Shandong University), Jinan, China

<sup>3</sup> Center for Health Preference Research, Shandong University, Jinan, China

<sup>4</sup> Medical College of Tibet University, Lhasa, China

<sup>5</sup> Center of Tibetan Studies (Everest Research Institute), Tibet University, Lhasa, China

**\*Corresponding author:**

Shunping Li and Zhaxi Dawa are co- corresponding author.

Shunping Li: lishunping@sdu.edu.cn;

Zhaxi Dawa: 904397981@qq.com

# Health-Related Quality of Life and its changes of Tibetan population in China:

## Based on the 2013 and 2018 National Health Services Surveys

### Abstract

**Objective:** Health-related quality of life (HRQoL) was an important health outcome measure for evaluating individual's overall health status. However, there was limited in the literature on HRQoL and its long-term changes of Tibetan population. This study aimed to assess HRQoL of Tibetan and its changes over time, and explore the differences in HRQoL for residents at different altitudes.

**Design:** Data for the cross-sectional study were extracted from the fifth and sixth waves of the National Health Services Surveys (NHSS) which conducted in 2013 and 2018. A multi-stage stratified cluster random sampling strategy was used to select representative participants.

**Setting:** Tibet Autonomous Region in China.

**Participants:** This study recruited 14752 participants in 2013 and 13106 participants in 2018, and after excluding observations with missing values for key variables, 10247 in 2013 and 6436 in 2018 were included in the study analysis.

**Primary and secondary outcome measures:** The EQ-5D-3L was used to measure participants' HRQoL.

**Results:** The mean health state utility (HSU) scores of the participants were  $0.969 \pm 0.078$  and  $0.966 \pm 0.077$  in 2013 and 2018, respectively. Pain/discomfort was the most frequently prevalent issue reported in 18.1% and 17.9% of the participants in 2013 and 2018, respectively. Tibetans living 3500–4000 m altitude had the best HRQoL. Age, sex, employment status, educational attainment, chronic disease, and weekly physical exercise were influencing factors associated with HRQoL.

**Conclusions:** The HRQoL of Tibetan population was lower than general Chinese population, and decreased over time between 5 years. There were differences in HRQoL among Tibetan at different altitudes, with residents living at 3500-4000m having the best quality of life. More attention should be paid to those Tibetans who are older, female, unemployed and without formal education.

### Strengths and limitations of this study

- We used Tibetan resident data from two National Health Service Surveys conducted in 2013 and 2018.
- This is the first study to assess the health-related quality of life and its changes of Tibetan over time.
- We divided the residents into three different altitude groups based on the international altitude standard and analysed the differences in HRQoL for residents at different altitudes.



- The same pool of participants was not characterized in the two surveys; however, some overlap may exist.

For peer review only

## Introduction

Health-related quality of life (HRQoL) is considered an important health outcome measure in recent years to inform patient-centred care, clinical decision-making, health policy and reimbursement decisions[1]. HRQoL refers to the impact of health on the quality of life of individuals focusing on individuals' health influencing their goals, expectations, standards, and concerns. It is a multidimensional concept referring to people's physical, mental, and social domains of well-being, as well as personal beliefs, level of independence, and their relationships with the environment[2]. The HRQoL of the residents in a region could be measured through the health surveys for the resident population[3]. The HRQoL can be evaluated by generic preference-based measures (GPBMs), which provide a standardized health state classification system and a tariff of quality weights for all health states described by the classification system[4]. The EuroQol5-Dimensions (EQ-5D) is the most widely used GPBMs to measure and evaluate HRQoL in population surveys, clinical studies, and economic evaluations[5]. The EQ-5D-3L was included in the 2008 National Health Services Surveys (NHSS) for the first time to assess the population health status in China.

The Tibet Autonomous Region (TAR), located on the Qinghai-Tibet plateau in southwest China with an average altitude of 4000 m above sea level, is commonly referred to as the "Roof of the World"[6]. The TAR has an area of > 1.2 million km<sup>2</sup>, accounting for one-eighth of China's geographic area. In 2021, the population in TAR was 3.65 million with 90% of the population being Tibetan[7]. Its social and economic development levels are relatively low among China's provinces. Most of the TAR

1  
2  
3  
4 population comprises of farmers and herders, scattered in remote rural areas with  
5  
6 limited income source mainly depending on agriculture[8]. The geographical  
7  
8 environment of the plateau, relatively poor economic conditions, poor transportation  
9  
10 and communication, and low access to medical services increased the health risks of  
11  
12 residents compared to those in low-altitude areas[9]. China has been undergoing a  
13  
14 period of unprecedented rates of economic growth, development, and poverty reduction  
15  
16 in recent decades, including the TAR[10]. Various economic, educational, and health  
17  
18 policies have been implemented for the development of society, which may have  
19  
20 greatly affected the health of residents living in TAR[11].  
21  
22  
23  
24  
25

26  
27 Previous studies have assessed the population HRQoL in various provinces of  
28  
29 China, such as Heilongjiang [12], Gansu [13], Shanxi [14], and Hunan[15]. However,  
30  
31 these studies focused on low-altitude areas and used data only from a cross-sectional  
32  
33 survey. Moreover, there are only two studies have assessed the change in HRQoL over  
34  
35 time in the general population of mainland China[16, 17]. One study used the data from  
36  
37 two waves of NHSS from 2008 to 2013[16], while another study used three waves of  
38  
39 Health Services Surveys from 2008 to 2020 in Tianjin[17]. Both studies reported a  
40  
41 slightly decreasing in HRQoL of the population and disparities in HRQoL across  
42  
43 different demographic and socioeconomic subgroups in China. Additionally, previous  
44  
45 studies on the health status of Tibetan population are limited due to the geographical  
46  
47 environment, lack of basic resources and facilities, and low population density.  
48  
49 Therefore, this study aimed to assess the HRQoL of Tibetan population and its changes  
50  
51 over time, and explore the differences in HRQoL for residents at different altitudes.  
52  
53  
54  
55  
56  
57  
58  
59  
60

## Methods

### Study design and population

Data for the cross-sectional study were extracted from the fifth and sixth waves of the NHSS in Tibet, which were conducted in 2013 and 2018. A multi-stage stratified cluster random sampling strategy was used to select representative participants. Each stage had a systematic random sampling approach. In the first stage, 24 counties were selected in 2013 and 25 counties were selected in 2018 from the seven cities in Tibet in proportion to their population size. In the second stage, 60 towns/sub-districts selected in 2013 and 59 towns/sub-districts were selected in 2018 using the random cluster method according to population size. In the third stage, three villages/communities were randomly selected from each town or sub-district, and 155 villages/communities were selected in 2013 and 159 villages/communities were selected in 2018. The majority of the counties, towns/ sub-districts, villages/communities sampled in 2018 were the same as those sampled in 2013. In the fourth stage, 20 households from each village of community were randomly selected for participation, and 4140 households were selected in 2013 and 4232 households were selected in 2018.

Questionnaires were administered to the participants through face-to-face interviews. The students majoring in Preventive Medicine at Medical College of Tibet University were uniformly recruited and trained to be interviewers by supervisors who had participated in national training. Pre-survey training workshops were offered to all interviewers following a standardised protocol. Eligible interviewers had to demonstrate proper understanding of the purpose of the NHSS and their ability to meet

1  
2  
3  
4 data collection standards developed by the Centre for Health Statistics and Information.

5  
6 The interviewers visited the selected households, and all family members in a sampled  
7  
8 household were eligible to participate in the survey. Before the survey commenced,  
9  
10 participants were informed of the survey's purposes and procedure and then provided  
11  
12 informed consent.  
13  
14

15  
16  
17 In total, 14752 participants in 2013 and 13106 participants in 2018 completed the  
18  
19 survey. The exclusion criteria in this study were as follows: (1) participants aged < 15  
20  
21 years were excluded since the EQ-5D-3L is recommended to be used among  $\geq 15$   
22  
23 years by the user guide (n=3412 in 2013 and n=2677 in 2018); (2) participants who did  
24  
25 not answer the questionnaires by themselves were excluded since the EQ-5D-3L need  
26  
27 to be self-complete (n=1001 in 2013 and n=3798 in 2018); (3) participants with missing  
28  
29 values for key variables including socio-demographic characteristics were excluded  
30  
31 (n=4 in 2013 and n=1 in 2018); (4) participants with ethnicities other than Tibetan were  
32  
33 excluded (n=88 in 2013 and n=194 in 2018). Overall, final sample size of 10247 in  
34  
35 2013 and 6436 in 2018 were included in this study for analysis.  
36  
37  
38  
39  
40  
41  
42

### 43 **Measurement of HRQoL**

44  
45  
46 The EQ-5D-3L is one of the most widely used HRQoL measurement instruments  
47  
48 classified into five dimensions: mobility (MO), self-care (SC), usual activities (UA),  
49  
50 pain/discomfort (PD), and anxiety/depression (AD). Each dimension contains three  
51  
52 functioning response levels (no problems, moderate problems, and extreme problems),  
53  
54 generating 243 ( $3^5$ ) possible health states, with the best state indicated by the response  
55  
56 "11111" and the worst health state indicated by the response "33333"[18]. A single  
57  
58  
59  
60

1  
2  
3  
4 health state utility (HSU) score can be assigned to each health state using a value set,  
5  
6 developed in a valuation study based on the general population's health preferences.  
7  
8

9  
10 Four value sets exist for the EQ-5D-3L in China with the first value set developed in  
11  
12 2014 (3L<sub>2014</sub> value set) using a sample comprising residents mainly from urban  
13  
14 areas[19], the second value set developed in 2018 (3L<sub>2018</sub> value set) adopted a more  
15  
16 representative sample of residents from both rural and urban areas[20], the other two  
17  
18 value set developed in 2022 (3L<sub>2022</sub> value set) recruited participants from rural areas of  
19  
20 five cities[21]. In this study, we chose to adopt the 3L<sub>2018</sub> value set. The main reason  
21  
22 for the choice was based on the participants in the 3L<sub>2014</sub> value set being selected  
23  
24 conveniently from big cities in urban areas through quota sampling. While the  
25  
26 3L<sub>2018</sub> value set, a more representative sample of respondents was obtained from both  
27  
28 rural and urban areas using a random sampling method[22]. The rural population  
29  
30 accounts for half of the Chinese population, and large disparities exist in socioeconomic  
31  
32 status, lifestyle, and health status between urban and rural areas in China[23]. In the  
33  
34 two waves of NHSS in the TAR, more than 75% of participants were from farming and  
35  
36 pastoral areas. Therefore, the 3L<sub>2018</sub> value set, which more closely matches the  
37  
38 distribution of the Tibetan population, was used in this study. To evaluate the robustness  
39  
40 and sensitivity of the 3L<sub>2018</sub> value set, we also used the 3L<sub>2022</sub> value set to analyse the  
41  
42 main results revealing that the main results of the two value sets had the same trends  
43  
44 (Supplementary Table 1).  
45  
46  
47  
48  
49  
50  
51  
52  
53  
54

### 55 56 **Independent variables**

57  
58  
59 In this study, the independent variables were sociodemographic, altitude-related, and  
60

1  
2  
3  
4 clinical disease variables, and health-related behaviours. Sociodemographic variables  
5  
6 were sex, age, employment status, educational attainment, and marital status. We  
7  
8 divided age into three groups: 15–44, 45–65, and  $\geq 65$  years old. Employment status  
9  
10 was divided into employed, retired, and unemployed. Educational attainment was  
11  
12 divided into three groups: illiterate, primary school, junior high school, and above.  
13  
14 Marital status was divided into single, married, divorced, and other.  
15  
16  
17  
18

19 The altitude-related variables included location and altitude. The participants were  
20  
21 divided into rural and urban groups based on their geographical location. The NHSS  
22  
23 did not collect data on the altitude of their residence; therefore, we used Google Maps  
24  
25 to obtain the precise altitude. Altitudes were defined as high (1500–3500 m), very high  
26  
27 (3500–5500 m), and extreme altitude ( $>5500$  m), as suggested by the International  
28  
29 Society for Mountain Medicine[24]. In this study, based on the China's policy of  
30  
31 subsidising plateau areas[25], we divided the plateau areas into three altitude groups,  
32  
33 high (1500–3500 m), very high (3500–4000 m), and extreme altitude (4000–5000 m).  
34  
35 The altitude classification criterion was consistent in two waves of surveys.  
36  
37  
38  
39  
40  
41  
42

43 The clinical disease variables included diagnosis of the participant with any illness  
44  
45 within two weeks before survey and the number of chronic diseases during the past six  
46  
47 months. A chronic condition was defined as a condition diagnosed by a doctor with  
48  
49 symptoms persisting or relevant medical treatment continuing over the past six months.  
50  
51  
52

53 Health-related behavioural variables were current smoking status, divided into three  
54  
55 groups: smoking all the time, has ever smoked, and never smoked. Participants were  
56  
57 asked to perform weekly physical exercise during the past six months, such as climbing,  
58  
59  
60

1  
2  
3  
4 ball games, equipment exercise, swimming, jogging, etc. The frequency of physical  
5  
6 exercise was divided into three groups: never exercised, 1–5 times, and > 6 times.  
7  
8

### 9 10 **Patient and public involvement**

11  
12 Patients and the public were not involved in the design, conduct, reporting or  
13  
14 dissemination plans of this research.  
15  
16

### 17 18 **Statistical analysis**

19  
20 Descriptive statistics were used for participants' characteristics and the reported  
21  
22 problems on the five dimensions of the EQ-5D-3L. Continuous variable were described  
23  
24 as mean and standard deviation (SD), whereas categorised variable was described as  
25  
26 frequency and percentages. Student's *t* test or analysis of variance (ANOVA) was used  
27  
28 when variables conformed to an approximately normal distribution; otherwise, the  
29  
30 Mann-Whitney *U* test or Kruskal-Wallis H test was used. Categorical variables were  
31  
32 compared between the groups using the chi-square test.  
33  
34  
35  
36  
37  
38  
39

40  
41 The importance of changes in the HSU scores was estimated using effect sizes (ES),  
42  
43 which were calculated as the difference between the highest and the lowest HSU scores  
44  
45 among the two surveys divided by the pooled standard deviation. The Effect sizes was  
46  
47 defined  $\leq 0.5$ , 0.5 to 0.8 and  $\geq 0.8$  were small, moderate and large[26]. In this study,  
48  
49 the moderate effect size (0.5) was considered as a threshold for minimal importance of  
50  
51 changes in the HSU scores. As the HSU score was left-skewed with a large proportion  
52  
53 of respondents in full health, the Tobit regression model was used to assess the  
54  
55 influencing factors associated with EQ-5D-3L HSU scores. Data were entered into  
56  
57  
58  
59  
60



1  
2  
3  
4 Epidata3.1 and analysed using SPSS 24.0, and STATA 15.0. A two-tailed  $p < 0.05$  was  
5  
6 considered statistically significant.  
7  
8

## 9 10 **Results**

### 11 12 **Participant characteristics**

13  
14  
15 The characteristics of the participants are listed in Table 1. In 2013, more than half of  
16  
17 the participants were in the 15–44 years age group (56.2%), and older participants  
18  
19 accounted for < 15% of the participants (11.0%) and less than half of the participants  
20  
21 were male (46.5%). Moreover, 57% of participants had never received education and  
22  
23 14.98% of the participants were unemployed. More than four out of five participants  
24  
25 resided in rural areas (84.9%) with an average altitude of  $3838 \pm 526$  m. Overall, 11.35%  
26  
27 of participants reported having a disease during 2 weeks before data collection, while,  
28  
29 more than half of participants (65.6%) had no chronic diseases during the past 6 months.  
30  
31  
32  
33  
34  
35

36  
37 In 2018, the sociodemographic characteristics of the participants were basically the  
38  
39 same as those in 2013. The average age was  $45.22 \pm 14.71$  years, and more than half of  
40  
41 the participants were female (56.6%). Of the participants, 52.0% never had education,  
42  
43 81.2% were employed, 78.3% were married, and 77.5% lived in rural areas with an  
44  
45 average altitude of  $3903 \pm 495$  m. Most of the participants (85.1%) were non-smokers,  
46  
47 and 62.3% had never engaged in weekly physical exercise during the past 6 months.  
48  
49 Compared two waves of surveys, participants in the 2018 were more female ( $P < 0.001$ ),  
50  
51 reported a higher level of education ( $P < 0.001$ ), had a lower employed proportion  
52  
53 ( $P = 0.008$ ), more lived in urban with more high altitude ( $P < 0.001$ ).  
54  
55  
56  
57  
58  
59  
60

## Participant's HRQoL and its changes

The HSU scores stratified by characteristics of participants in two surveys were listed in Table 2. The mean HSU scores of the participants were  $0.969 \pm 0.078$  in 2013 and  $0.966 \pm 0.077$  in 2018, which showed a significantly decreasing trend ( $P < 0.001$ ,  $ES = 0.136$ ). Figure 1 presents the distribution of participant's HSU scores in two surveys. It revealed a left-skewed distribution with skewness of  $-4.189$  in 2013 and  $-4.642$  in 2018, ranging from 0.170 to 1.000. The states of 11111 (no problems in any dimension) were reported in 74% and 70% of the participants in 2013 and 2018, respectively. The trend in HSU scores was observed decreased in most subgroups.

The highest proportion of reporting health problems was the pain/discomfort dimension (2013:18.1%, 2018: 17.9%). Problems with self-care dimension was least prevalent, 7.7% and 8.5% participants reported in 2013 and 2018, respectively. As compared to the 2013, reported problems increased in mobility (by 1.2%), self-care (by 0.8%), usual activities (by 0.6%), and anxiety/depression (by 3.8%) in 2018. While, reported problems in pain/discomfort decreased by 0.2% (Table 3).

## HRQoL of participants at different altitudes

Two survey's findings showed that participants lived in the 3500-4000m group had the highest HSU scores. Similar to the general trend, health state scores in 2018 were slightly lower than those in 2013 at different altitude groups (Table 2). Figure 2 describes the percentage of participants with self-reported health problems by different altitude groups. The distribution trend was generally consistent in two surveys.

1  
2  
3  
4 Participants lived in 3500–4000m had the least reported problems in all five dimensions,  
5  
6 while participants lived in 1500–3500m and 4000–5000m reported more problems in  
7  
8 pain/discomfort, anxiety/depression and mobility dimensions.  
9  
10

### 11 12 **Factors associated with HSU scores**

13  
14  
15 The Tobit regression analyses of the factors associated with HSU scores were presented  
16  
17 in Table 4. The result confirmed the decreased trend in HSU scores over time ( $\beta = -$   
18  
19 0.014,  $P < 0.001$ ), after adjustment for variations in the other independent variables.  
20  
21 However, the effect sizes of this change did not reach the threshold of minimal clinical  
22  
23 importance (ES=0.04). The elderly, the unemployed, the separated/divorced/widowed,  
24  
25 and the healthy participants were significant predictors of the HSU score, with generally  
26  
27 larger values of ES and reached the threshold of minimal clinical importance.  
28  
29  
30  
31  
32

### 33 34 **Discussion**

35  
36  
37 To the best of our knowledge, this is the first study to evaluate the HRQoL of Tibetan  
38  
39 population and its changes over time, based on a representative sample from the NHSS  
40  
41 of Tibet in China. The HRQoL of Tibetan was lower than general Chinese population,  
42  
43 and decreased over time in five years (2013–2018). Moreover, we found Tibetans living  
44  
45 at 3500–4000m altitude had the best HRQoL. Our study also identified factors  
46  
47 influencing HRQoL including females, elders, unemployed, and more chronic diseases  
48  
49 with a negative impact. While, higher education levels, no disease during the past two  
50  
51 weeks, and frequent weekly physical exercise had a positive impact on HRQoL of the  
52  
53 Tibetan population.  
54  
55  
56  
57  
58  
59  
60

1  
2  
3  
4 The mean HSU scores of the Tibetan population were 0.969 (SD = 0.078) in 2013  
5  
6 and 0.966 (SD = 0.077) in 2018, higher than that reported in Heilongjiang, Hunan, and  
7  
8 Shanxi in China[12, 13, 15]. This may be due to the use of two different 3L value sets  
9  
10 used to calculate the HSU score. Compared to the 3L<sub>2018</sub> algorithm, the 3L<sub>2014</sub> algorithm  
11  
12 includes a constant term and N3, resulting in a utility value gap between full health and  
13  
14 the second-best health state, reducing the values of other health states[27]. Therefore,  
15  
16 the 3L<sub>2018</sub> index score was systematically higher than the 3L<sub>2014</sub> index score at absolute  
17  
18 levels[22]. The result also indicated that HSU scores of two waves of surveys were  
19  
20 significantly lower than the that of the general Chinese population, confirming regional  
21  
22 and residential disparities in HRQoL of the Chinese populations[28]. The eastern–  
23  
24 middle–western disparities in development have existed historically. Although in recent  
25  
26 years China’s development strategy has focused more on western areas including  
27  
28 implementing poverty alleviation policies, promoting the construction of infrastructure,  
29  
30 low taxation, and national level fiscal transfer to the middle and western areas, a huge  
31  
32 gap still exists between regions[23] with lower HRQoL in residents of western regions  
33  
34 than that of those in the eastern region.  
35  
36  
37  
38  
39  
40  
41  
42  
43  
44

45 Based on the HRQoL changes between the two waves of surveys, HSU scores in  
46  
47 2018 were slightly lower than those in 2013, and statistical differences existed in the  
48  
49 total population and at different demographic characteristics levels. However, the  
50  
51 changes between 2013 and 2018 were minimal and failed to reach the threshold  
52  
53 minimal clinically important difference of ~0.074 based on EQ-5D-3L[29]. This is  
54  
55 consistent with previous studies on the changes in HRQoL in the Chinese population[16,  
56  
57  
58  
59  
60

1  
2  
3  
4 17]. This could be due to proportion of extreme problems reported by EQ-5D-3L, with  
5  
6 0.42 to 0.45% reporting extreme problems in anxiety/depression and pain/discomfort  
7  
8 compared to 2013. According to the 3L<sub>2014</sub> algorithm, the value in level-3 (L3)  
9  
10 parameters is larger than level-2 (L2) or level-1 (L1) with increasing health state  
11  
12 severity. Hence, for a health transition involving both improvement and deterioration,  
13  
14 the magnitude of health gain from improvement in a certain dimension may be offset  
15  
16 to a large extent by deterioration in another dimension[22]. Another possible reason  
17  
18 may be related to the changing demographic and socioeconomic status in China.  
19  
20 Between 2013 and 2018, the government implemented a series of policies, especially  
21  
22 the targeting poverty alleviation strategy, driving continuous rapid growth of residents'  
23  
24 income and further improving the consumption level and length of life. Life expectancy  
25  
26 increased from 76.3–77.0 years during this time<sup>35</sup>. However, the aging of the population,  
27  
28 unhealthy lifestyles, and environmental exposure have led to the rising prevalence of  
29  
30 chronic diseases and functional limitations, related to lower HRQoL among the Tibetan  
31  
32 population.  
33  
34  
35  
36  
37  
38  
39  
40  
41  
42

43 Pain/discomfort was the most frequently reported problem in this study similar to  
44  
45 previous studies in China, however, the absolute proportion of each dimension reported  
46  
47 was higher than the general population trends based on the NHSS data[28] and other  
48  
49 provincial studies in China[12, 14, 15]. This may be due to the plateau disease[30].  
50  
51 Residents living on the plateau for a long time evolve a unique physiological  
52  
53 mechanism to adapt to the environment. However, some residents gradually lose their  
54  
55 adaptability and suffer from various acute or chronic diseases related to the plateau  
56  
57  
58  
59  
60

1  
2  
3  
4 environment under the stimulation of continuous hypoxia and low pressure[31]. The  
5  
6 two-week illness prevalence rate of residents aged  $\geq 15$  years in Tibet was 20.1% in  
7  
8  
9 2018, and hypertension has been reported as the most common chronic disease[32]. A  
10  
11 previous study reported that the prevalence of hypertension in Tibet is higher than the  
12  
13 Chinese national level and is the highest among all provinces, as well as higher than  
14  
15 other residents living at high altitudes[33, 34]. As altitude increases, progressive  
16  
17 reductions in barometric pressure, air temperature, and air humidity are observed.  
18  
19 Headache, shortness of breath, chest tightness, anorexia, dizziness, limb fatigue, and  
20  
21 sleep disturbances were common symptoms of Tibetan[32].  
22  
23  
24  
25

26  
27 Compared with other high-altitudes, we found that Tibetans living at 3500–4000  
28  
29 m had the best HRQoL. This could be attributed to Tibet's topography, population  
30  
31 distribution, and socioeconomic status. The TAR is a vast territory with a sparse  
32  
33 population with high-altitude in the northwest and low in the southeast. The region can  
34  
35 be divided into three regions based on altitude. The Qiangtang Plateau in the north ( $>$   
36  
37 5000 m), and the central basin region and Himalayan mountains (4000–5000 m on  
38  
39 average). The valleys of the middle and lower reaches of the Yarlung Zangbo River and  
40  
41 the three rivers in eastern Tibet have an altitude of 3000–4000 m, and 60% of the  
42  
43 population is concentrated there. Of the seven cities surveyed, Lhasa, Shannan, Qamdo,  
44  
45 and Shigaze have an average altitude of 3500–4000 m with their GDP ranking among  
46  
47 the top four in Tibet according to the Seventh National Census in 2020. Similar results  
48  
49 have been reported previously with socioeconomic status significantly associated with  
50  
51 higher HRQoL[16]. Socioeconomic status is detrimental to health as it affects people's  
52  
53  
54  
55  
56  
57  
58  
59  
60

1  
2  
3  
4 living and working conditions and restricts accessibility to medical care[35]. Moreover,  
5  
6 socioeconomic status affects people's psychological state and cognition of the world  
7  
8 around them[36]. During the few last decades, China has implemented strong policies  
9  
10 to facilitate economic development in the Qinghai-Tibet plateau (e.g., the Strategy of  
11  
12 the Development of China's West). The implementation of supportive strategies should  
13  
14 help improve socioeconomic status in the future, including improving public  
15  
16 infrastructure, medical service capacity, and disease prevention improving HRQoL.  
17  
18  
19  
20  
21

22 Those living in low-altitude areas (1500–3500m) reported the most problems in  
23  
24 anxiety/depression consistent with previous studies. A large sample survey of the  
25  
26 prevalence of depression among Tibetans of the Qinghai-Tibet Plateau was 28.6%,  
27  
28 higher than that in the general Chinese population and higher than that reported in a  
29  
30 western study with high-altitude samples[37]. The prevalence of depression is  
31  
32 significantly correlated with climatic pressure, particularly altitude[38]. Generally, the  
33  
34 combined effects of harsh natural environment on the plateau, high-altitude hypoxia,  
35  
36 low atmospheric pressure, intense ultraviolet radiation, relatively weak community  
37  
38 support caused by low population density, and lack of access to mental health resources  
39  
40 increases the severity of depression among those living in high-altitude areas[39-41].  
41  
42 In this study, the area with an altitude of 1500–3500 m was located southeast of the  
43  
44 TAR. Nyingchi City, with an average altitude of 3100 m, has the lowest altitude and  
45  
46 wettest climate in TAR. With convenient transportation and multiple splendid sceneries,  
47  
48 tourism is the main source of income in this area, attracting millions of people traveling  
49  
50 for sightseeing, mountaineering, and trekking every year[42]. Previous studies have  
51  
52  
53  
54  
55  
56  
57  
58  
59  
60

1  
2  
3  
4 reported a significant association between tourism impact and residents' quality of  
5  
6 life[43, 44]. Tourism provides employment opportunities and tax revenues, supports  
7  
8 economic diversity, and services and products enjoyed by residents[45, 46]. However,  
9  
10 negative impacts of tourism on residents' HRQoL have been reported including  
11  
12 crowding, traffic and parking issues, criminality, and cost of living, changes in hosts'  
13  
14 way of life, and friction between tourists and residents[47]. The perceived negative  
15  
16 impacts, negative emotions, pressure, and relative deprivation of the residents will  
17  
18 affect their subjective well-being, leading to psychological problems including anxiety  
19  
20 and depression.  
21  
22  
23  
24  
25

26  
27 This study had several limitations. First, this study did not recruit the same pool of  
28  
29 participants in two waves of surveys, making it difficult to identify causal associations.  
30  
31 However, the same cities were selected, and the participants may partly overlap. Second,  
32  
33 the participants recruited in the surveys were those had lived in Tibet for more than six  
34  
35 months; however, we could not determine if they were born in Tibet or came to work  
36  
37 from other low-altitude areas. A small-scale survey could be conducted to refine the  
38  
39 participant inclusion criteria to validate the study findings in the future. Third, many  
40  
41 studies have reported that EQ-5D-3L has more significant ceiling effects than EQ-5D-  
42  
43 5L. However, EQ-5D-3L is more suitable for use in large-scale population surveys  
44  
45 because of its small cognitive burden. Moreover, the comparison of the two waves of  
46  
47 surveys indicated the overall changing trends in HRQoL of participants were able to be  
48  
49 derived from EQ-5D-3L.  
50  
51  
52  
53  
54  
55  
56  
57  
58

## 59 **Conclusion**



1  
2  
3  
4 This study revealed the HRQoL of Tibetan population was lower than general Chinese  
5  
6 population, and decreased over time between 5 years. There were differences in  
7  
8 HRQoL among Tibetan at different altitudes, with residents living at 3500-4000m  
9  
10 having the best quality of life. More attention should be paid to those Tibetans who are  
11  
12 older, female, unemployed and without formal education. Targeted policies and  
13  
14 strategies need to be strengthened, including plateau subsidies, poverty alleviation,  
15  
16 primary health service capacity, standardized management of chronic diseases, and  
17  
18 health education.  
19  
20  
21  
22  
23  
24

### 25 **Acknowledgements**

26  
27  
28 We gratefully acknowledge the contribution of the investigators from Preventive  
29  
30 Medicine at Medical College of Tibet University, and we also thank all the participants  
31  
32 who participated in the study.  
33  
34  
35  
36

### 37 **Funding statement**

38  
39  
40 This work was supported by the Sixth National Health Service Survey Project in Tibet  
41  
42 (grant number 18080027); and China Medical Board (grant number 11-086).  
43  
44  
45

### 46 **Competing interest statement**

47  
48  
49 All authors declare no competing interests.  
50  
51

### 52 **Author Contributions**

53  
54  
55 SPL and ZXDW have substantial contributions to conception and design, acquisition  
56  
57 of funding, data and interpretation of data. CDZG and ZXCM were involved in the  
58  
59  
60

1  
2  
3  
4 acquisition of data. LD, ZS and CFL were responsible for the data analysis and  
5  
6 interpretation of data. LD drafted the manuscript, ZS, CDZG, ZXCM and CFL revised  
7  
8 it critically for important intellectual content, LD and SPL was responsible for the  
9  
10 decision to submit the manuscript, and all authors contributed to final approval of the  
11  
12 manuscript.  
13  
14  
15

## 16 17 **Ethics statements**

### 18 19 **Patient consent for publication**

20  
21 Not applicable.  
22  
23

### 24 25 **Ethics approval**

26  
27 This study involves human participants and was approved. This study was conducted  
28  
29 with the approval of the National Health Commission of the People's Republic of China  
30  
31 and the Health Commission of Tibet autonomous region.  
32  
33  
34  
35  
36  
37

### 38 39 **Data availability statement**

40  
41 Data are available upon reasonable request. We have included all the data produced in  
42  
43 the present work in the manuscript. Note that the raw data used in the study were  
44  
45 obtained from National Health Service Surveys of China. We are unable to attach all  
46  
47 the raw data for each participant in this paper due to the ethical restrictions.  
48  
49  
50  
51  
52  
53  
54  
55  
56  
57  
58  
59  
60

## References

1. Calvert M, Blazeby J, Altman DG, et al. Reporting of Patient-Reported Outcomes in Randomized Trials. *JAMA* 2013; 309:814
2. Karimi M, Brazier J. Health, Health-Related Quality of Life, and Quality of Life: What is the Difference? *Pharmacoeconomics* 2016; 34:645-9
3. Macran S, Weatherly H, Kind P. Measuring population health: a comparison of three generic health status measures. *Med Care* 2003; 41:218-31
4. Goodwin E, Green C. A Systematic Review of the Literature on the Development of Condition-Specific Preference-Based Measures of Health. *Appl Health Econ Health Policy* 2016; 14:161-83
5. Devlin NJ, Brooks R. EQ-5D and the EuroQol Group: Past, Present and Future. *Appl Health Econ Health Policy* 2017; 15:127-37
6. Mingji C, Onakpoya IJ, Perera R, Ward AM, Heneghan CJ. Relationship between altitude and the prevalence of hypertension in Tibet: a systematic review. *Heart* 2015; 101:1054-60
7. Tibet Autonomous Region Statistics Bureau. Communiqué on Main Data of the Seventh National Population Census of Tibet Autonomous Region., 2021
8. Zheng Z. Research on the village public service system innovation of agricultural and pastoral areas in tibet--from the perspective of integrated anti-poverty development. *Ethnology Journal* 2012:34-43
9. Jiannamu, Xu X, You H, et al. Inequalities in health-related quality of life and the contribution from socioeconomic status: evidence from Tibet, China. *BMC Public Health* 2020; 20:630
10. Graham C, Zhou S, Zhang J. Happiness and Health in China: The Paradox of Progress. *World Dev* 2017:S305750X-S15308056X
11. Huang L, Wang Z, Wang H, et al. Nutrition transition and related health challenges over decades in China. *Eur J Clin Nutr* 2021; 75:247-52
12. Huang W, Yu H, Liu C, et al. Assessing Health-Related Quality of Life of Chinese Adults in Heilongjiang Using EQ-5D-3L. *Int J Environ Res Public Health* 2017; 14
13. Si L, Shi L, Chen M, Palmer AJ. Establishing benchmark EQ-5D-3L population health state utilities and identifying their correlates in Gansu Province, China. *Qual Life Res* 2017; 26:3049-58
14. Tan Z, Liang Y, Liu S, et al. Health-related quality of life as measured with EQ-5D among populations with and without specific chronic conditions: a population-based survey in Shaanxi Province, China. *PLoS One* 2013; 8:e65958
15. Deng X, Dong P, Zhang L, et al. Health-related quality of life in residents aged 18 years and older with and without disease: findings from the First Provincial Health Services Survey of Hunan, China. *BMJ Open* 2017; 7:e15880
16. Yao Q, Liu C, Zhang Y, Xu L. Changes in health-related quality of life of Chinese populations measured by the EQ-5D-3 L: a comparison of the 2008 and 2013 National Health Services Surveys. *Health Qual Life Outcomes* 2019; 17:43
17. Wang D, Xie S, Wu J, Sun B. The trend in quality of life of Chinese population: analysis based on population health surveys from 2008 to 2020. *BMC Public Health* 2023; 23:167
18. Brooks R. EuroQol: the current state of play. *Health Policy* 1996; 37:53-72
19. Liu GG, Wu H, Li M, Gao C, Luo N. Chinese time trade-off values for EQ-5D health states. *Value Health* 2014; 17:597-604
20. Zhuo L, Xu L, Ye J, et al. Time Trade-Off Value Set for EQ-5D-3L Based on a Nationally Representative Chinese Population Survey. *Value Health* 2018; 21:1330-7

- 1
- 2
- 3
- 4 21.Liu GG, Guan H, Jin X, Zhang H, Vortherms SA, Wu H. Rural population's preferences matter: a
- 5 value set for the EQ-5D-3L health states for China's rural population. *Health Qual Life Outcomes* 2022;
- 6 20:14
- 7
- 8 22.Zhang RY, Wang W, Zhou HJ, Xuan JW, Luo N, Wang P. A head-to-head comparison of the EQ-
- 9 5D-3L index scores derived from the two EQ-5D-3L value sets for China. *Health Qual Life Outcomes*
- 10 2022; 20:80
- 11
- 12 23.Sun S, Chen J, Johannesson M, et al. Regional differences in health status in China: population health-
- 13 related quality of life results from the National Health Services Survey 2008. *Health Place* 2011; 17:671-
- 14 80
- 15
- 16 24.Woolcott OO, Ader M, Bergman RN. Glucose homeostasis during short-term and prolonged exposure
- 17 to high altitudes. *Endocr Rev* 2015; 36:149-73
- 18
- 19 25.The Ministry of Labor and Personnel and the Ministry of Finance. The Ministry of Labor and
- 20 Personnel and the Ministry of Finance responded to the People's Government of Tibet Autonomous
- 21 Region on issues concerning the implementation of temporary subsidies for workers in plateau areas.,
- 22 1984
- 23
- 24 26.Cohen J. A power primer. *Psychol Bull* 1992; 112:155-9
- 25
- 26 27.Pan CW, Zhang RY, Luo N, et al. How the EQ-5D utilities are derived matters in Chinese diabetes
- 27 patients: a comparison based on different EQ-5D scoring functions for China. *Qual Life Res* 2020;
- 28 29:3087-94
- 29
- 30 28.Yao Q, Liu C, Zhang Y, Xu L. Population norms for the EQ-5D-3L in China derived from the 2013
- 31 National Health Services Survey. *J Glob Health* 2021; 11:8001
- 32
- 33 29.Walters SJ, Brazier JE. Comparison of the minimally important difference for two health state utility
- 34 measures: EQ-5D and SF-6D. *Qual Life Res* 2005; 14:1523-32
- 35
- 36 30.Netzer N, Strohl K, Faulhaber M, Gatterer H, Burtcher M. Hypoxia-related altitude illnesses. *J Travel*
- 37 *Med* 2013; 20:247-55
- 38
- 39 31.Crawford JE, Amaru R, Song J, et al. Natural Selection on Genes Related to Cardiovascular Health
- 40 in High-Altitude Adapted Andeans. *Am J Hum Genet* 2017; 101:752-67
- 41
- 42 32.Deng R, Labasangzhu, Zhaxideji, et al. Illness prevalence rate in Tibet, China: data from the 2018
- 43 National Health Service Survey. *BMC Public Health* 2020; 20:955
- 44
- 45 33.Li K, Liang Y, Sun Y, et al. The relationship between polymorphisms at 17 gene sites and
- 46 hypertension among the Aboriginal Tibetan people. *Biomed Environ Sci* 2012; 25:526-32
- 47
- 48 34.Wang J, Zhang L, Wang F, Liu L, Wang H. Prevalence, awareness, treatment, and control of
- 49 hypertension in China: results from a national survey. *Am J Hypertens* 2014; 27:1355-61
- 50
- 51 35.Jiang Y, Hesser JE. Associations between health-related quality of life and demographics and health
- 52 risks. Results from Rhode Island's 2002 behavioral risk factor survey. *Health Qual Life Outcomes* 2006;
- 53 4:14
- 54
- 55 36.Matthews KA, Gallo LC. Psychological perspectives on pathways linking socioeconomic status and
- 56 physical health. *Annu Rev Psychol* 2011; 62:501-30
- 57
- 58 37.Golicki D, Niewada M, Jakubczyk M, Wrona W, Hermanowski T. Self-assessed health status in
- 59 Poland: EQ-5D findings from the Polish valuation study. *Pol Arch Med Wewn* 2010; 120:276-81
- 60
- 38.Gamboia JL, Caceda R, Arregui A. Is depression the link between suicide and high altitude? *High Alt*
- Med Biol 2011; 12:403-4, 405
- 39.Wang J, Zhou Y, Liang Y, Liu Z. A Large Sample Survey of Tibetan People on the Qinghai-Tibet
- Plateau: Current Situation of Depression and Risk Factors. *Int J Environ Res Public Health* 2019; 17

- 1  
2  
3  
4  
5  
6  
7  
8  
9  
10  
11  
12  
13  
14  
15  
16  
17  
18  
19  
20  
21  
22  
23  
24  
25  
26  
27  
28  
29  
30  
31  
32  
33  
34  
35  
36  
37  
38  
39  
40  
41  
42  
43  
44  
45  
46  
47  
48  
49  
50  
51  
52  
53  
54  
55  
56  
57  
58  
59  
60
40. Ding Y, Shi B, Su G, et al. Assessing Suitability of Human Settlements in High-Altitude Area Using a Comprehensive Index Method: A Case Study of Tibet, China. *Sustainability* 2021; 13
41. Li XY, Wu XY, Fu C, Shen XF, Wu YH, Wang T. Effects of acute mild and moderate hypoxia on human mood state. *Space Med Eng (Beijing)* 2000; 13:1-5
42. Chen Y, Zhang G, Chen Z, et al. A warming climate may reduce health risks of hypoxia on the Qinghai-Tibet Plateau. *Sci Bull (Beijing)* 2022; 67:341-4
43. Kim, Hyelin, Uysal, Muzaffer, Woo, Eunju. Life satisfaction and support for tourism development. *Annals of tourism research: A social sciences journal* 2015; 50:84-97
44. Vargas-Sanchez A, Plaza-Mejia MDL, Porras-Bueno N. Understanding Residents' Attitudes toward the Development of Industrial Tourism in a Former Mining Community. *J Travel Res* 2009; 47:373-87
45. Aref F. The Effects of Tourism on Quality of Life: A Case Study of Shiraz, Iran. *Life ence Journal* 2011; 8:26-30
46. Andereck, Kathleen L, Nyaupane, Gyan P. Exploring the Nature of Tourism and Quality of Life Perceptions among Residents. *J Travel Res* 2011; 11:25-34
47. Andereck KL, Valentine KM, Knopf RC, Vogt CA. Residents' perceptions of community tourism impacts. *Ann Tour Res* 2005; 32:1056-76

**Table 1 Characteristics of the participants**

| Characteristics                         | 2013 (N=10247) |      | 2018 (N=6436) |      | Total (N=16683) |      | P-value |
|-----------------------------------------|----------------|------|---------------|------|-----------------|------|---------|
|                                         | N              | %    | N             | %    | N               | %    |         |
| <b>Age groups</b>                       |                |      |               |      |                 |      | <0.001  |
| 15-44 years                             | 5754           | 56.2 | 3159          | 49.1 | 8913            | 53.4 |         |
| 45-64 years                             | 3363           | 32.8 | 2568          | 39.9 | 5931            | 35.6 |         |
| ≥65 years                               | 1130           | 11.0 | 709           | 11.0 | 1839            | 11.0 |         |
| <b>Gender</b>                           |                |      |               |      |                 |      | <0.001  |
| Male                                    | 4766           | 46.5 | 2792          | 43.4 | 7558            | 45.3 |         |
| Female                                  | 5481           | 53.5 | 3644          | 56.6 | 9125            | 54.7 |         |
| <b>Educational attainment</b>           |                |      |               |      |                 |      | <0.001  |
| Illiterate                              | 5841           | 57.0 | 3348          | 52.0 | 9189            | 55.1 |         |
| Primary school                          | 3080           | 30.1 | 2143          | 33.3 | 5223            | 31.3 |         |
| Junior high school and above            | 1326           | 12.9 | 945           | 14.7 | 2271            | 13.6 |         |
| <b>Employment</b>                       |                |      |               |      |                 |      | 0.008   |
| Employed                                | 8514           | 83.1 | 5228          | 81.3 | 13742           | 82.4 |         |
| Retired                                 | 198            | 1.9  | 131           | 2.0  | 329             | 2.0  |         |
| Unemployed                              | 1535           | 15.0 | 1077          | 16.7 | 2612            | 15.7 |         |
| <b>Marital status</b>                   |                |      |               |      |                 |      | <0.001  |
| Single                                  | 1563           | 15.3 | 748           | 11.6 | 2311            | 13.9 |         |
| Married                                 | 7718           | 75.3 | 5037          | 78.3 | 12755           | 76.5 |         |
| Separated/divorced/widowed              | 966            | 9.4  | 651           | 10.1 | 1617            | 9.7  |         |
| <b>Location</b>                         |                |      |               |      |                 |      | <0.001  |
| Rural                                   | 8699           | 84.9 | 4988          | 77.5 | 13687           | 82.0 |         |
| Urban                                   | 1548           | 15.1 | 1448          | 22.5 | 2996            | 18.0 |         |
| <b>Altitude, m (Mean±SD)</b>            | 3838±<br>526   | -    | 3903±<br>495  | -    | 3863±51<br>5    | -    |         |
| <b>Altitude groups</b>                  |                |      |               |      |                 |      | <0.001  |
| 1500-3500 m                             | 2219           | 21.7 | 1123          | 17.5 | 3342            | 20.0 |         |
| 3500-4000 m                             | 4816           | 47.0 | 2933          | 45.6 | 7749            | 46.4 |         |
| 4000-5000 m                             | 3212           | 31.3 | 2380          | 36.9 | 5592            | 33.5 |         |
| <b>Diseased during the past 2 weeks</b> |                |      |               |      |                 |      | 0.366   |
| Yes                                     | 1152           | 11.4 | 701           | 10.9 | 1853            | 11.1 |         |
| No                                      | 9002           | 88.6 | 5735          | 89.1 | 14737           | 88.3 |         |
| <b>Number of chronic diseases</b>       |                |      |               |      |                 |      | <0.001  |
| 0                                       | 6726           | 65.6 | 3684          | 57.2 | 10410           | 62.4 |         |
| 1                                       | 2634           | 25.7 | 1743          | 27.1 | 4377            | 26.2 |         |
| ≥2                                      | 887            | 8.7  | 1009          | 15.7 | 1896            | 11.4 |         |
| <b>Smoking</b>                          |                |      |               |      |                 |      | <0.001  |
| Smoker                                  | 1424           | 13.9 | 724           | 11.2 | 2148            | 12.9 |         |
| Ex-smoker                               | 487            | 4.7  | 238           | 3.7  | 725             | 4.3  |         |
| Non-smoker                              | 8336           | 81.4 | 5474          | 85.1 | 13810           | 82.8 |         |

|                                                          |      |      |      |      |       |      |        |
|----------------------------------------------------------|------|------|------|------|-------|------|--------|
| <b>Weekly physical exercise during the past 6 months</b> |      |      |      |      |       |      | <0.001 |
| Never exercised                                          | 9437 | 92.3 | 4054 | 63.0 | 13491 | 80.9 |        |
| 1–5 times                                                | 511  | 5.0  | 1247 | 19.4 | 1758  | 10.5 |        |
| ≥6 times                                                 | 279  | 2.7  | 1135 | 17.6 | 1414  | 8.5  |        |

For peer review only

**Table 2 Health state utility score stratified by characteristics of participants in two surveys**

| Characteristics                                          | 2013<br>(N=10247) | 2018<br>(N=6436) | Effect Size<br>(ES) | P-value |
|----------------------------------------------------------|-------------------|------------------|---------------------|---------|
| <b>Age</b>                                               |                   |                  |                     |         |
| 15-44 years                                              | 0.987(0.049)      | 0.987(0.041)     | 0.000               | 0.003   |
| 45-64 years                                              | 0.962(0.078)      | 0.959(0.076)     | 0.039               | 0.013   |
| ≥65 years                                                | 0.900(0.133)      | 0.899(0.139)     | 0.007               | 0.973   |
| <b>Gender</b>                                            |                   |                  |                     |         |
| Male                                                     | 0.975(0.071)      | 0.973(0.070)     | 0.030               | 0.002   |
| Female                                                   | 0.964(0.083)      | 0.961(0.082)     | 0.036               | <0.001  |
| <b>Employment</b>                                        |                   |                  |                     |         |
| Employed                                                 | 0.977(0.064)      | 0.976(0.058)     | 0.016               | <0.001  |
| Retired                                                  | 0.945(0.116)      | 0.965(0.057)     | 0.205               | 0.493   |
| Unemployed                                               | 0.926(0.117)      | 0.918(0.128)     | 0.066               | 0.011   |
| <b>Educational attainment</b>                            |                   |                  |                     |         |
| Illiterate                                               | 0.959(0.088)      | 0.956(0.088)     | 0.034               | <0.001  |
| Primary school                                           | 0.979(0.064)      | 0.971(0.069)     | 0.121               | <0.001  |
| Junior high school and above                             | 0.990(0.046)      | 0.991(0.038)     | 0.023               | 0.180   |
| <b>Marital status</b>                                    |                   |                  |                     |         |
| Single                                                   | 0.975(0.086)      | 0.979(0.068)     | 0.050               | 0.182   |
| Married                                                  | 0.973(0.069)      | 0.969(0.069)     | 0.058               | <0.001  |
| Separated/divorced/widowed                               | 0.928(0.111)      | 0.925(0.124)     | 0.026               | 0.832   |
| <b>Location</b>                                          |                   |                  |                     |         |
| Rural                                                    | 0.967(0.080)      | 0.966(0.077)     | 0.013               | 0.001   |
| Urban                                                    | 0.980(0.065)      | 0.967(0.080)     | 0.183               | <0.001  |
| <b>Altitude groups</b>                                   |                   |                  |                     |         |
| 1500-3500m                                               | 0.966(0.078)      | 0.961(0.079)     | 0.064               | <0.001  |
| 3500-4000m                                               | 0.975(0.072)      | 0.970(0.073)     | 0.069               | <0.001  |
| 4000-5000m                                               | 0.963(0.084)      | 0.963(0.081)     | 0.000               | 0.411   |
| <b>Diseased during the past 2 weeks</b>                  |                   |                  |                     |         |
| Yes                                                      | 0.933(0.111)      | 0.934(0.100)     | 0.009               | 0.303   |
| No                                                       | 0.974(0.072)      | 0.970(0.073)     | 0.055               | <0.001  |
| <b>Number of chronic diseases</b>                        |                   |                  |                     |         |
| 0                                                        | 0.983(0.057)      | 0.986(0.049)     | 0.055               | 0.331   |
| 1                                                        | 0.950(0.097)      | 0.951(0.091)     | 0.010               | 0.663   |
| ≥2                                                       | 0.920(0.113)      | 0.919(0.106)     | 0.009               | 0.223   |
| <b>Smoking</b>                                           |                   |                  |                     |         |
| Smoker                                                   | 0.985(0.056)      | 0.984(0.048)     | 0.019               | 0.094   |
| Ex-smoker                                                | 0.965(0.073)      | 0.954(0.089)     | 0.138               | 0.146   |
| Non-smoker                                               | 0.967(0.081)      | 0.964(0.080)     | 0.037               | <0.001  |
| <b>Weekly physical exercise during the past 6 months</b> |                   |                  |                     |         |
| Never exercised                                          | 0.969(0.079)      | 0.961(0.086)     | 0.098               | <0.001  |
| 1-5 times                                                | 0.967(0.071)      | 0.973(0.066)     | 0.087               | 0.004   |



|              |              |              |       |        |
|--------------|--------------|--------------|-------|--------|
| ≥6 times     | 0.985(0.044) | 0.977(0.051) | 0.171 | <0.001 |
| <b>Total</b> | 0.969(0.078) | 0.966(0.077) | 0.136 | <0.001 |

For peer review only

**Table 3 health problems reported by participants based on EQ-5D-3L**

| EQ-5D-3L                  | 2013 |      | 2018 |      | $\chi^2$ | P-value |
|---------------------------|------|------|------|------|----------|---------|
|                           | N    | %    | N    | %    |          |         |
| <b>Mobility</b>           |      |      |      |      | 12.794   | 0.002   |
| No problem                | 8956 | 87.4 | 5544 | 86.2 |          |         |
| Moderate problem          | 1221 | 11.9 | 865  | 13.4 |          |         |
| Extreme problem           | 70   | 0.7  | 27   | 0.4  |          |         |
| <b>Self-care</b>          |      |      |      |      | 2.791    | 0.248   |
| No problem                | 9453 | 92.3 | 5891 | 91.5 |          |         |
| Moderate problem          | 733  | 7.1  | 502  | 7.8  |          |         |
| Extreme problem           | 61   | 0.6  | 43   | 0.7  |          |         |
| <b>Usual activities</b>   |      |      |      |      | 1.407    | 0.495   |
| No problem                | 9014 | 88.0 | 5624 | 87.4 |          |         |
| Moderate problem          | 1077 | 10.5 | 714  | 11.1 |          |         |
| Extreme problem           | 156  | 1.5  | 98   | 1.5  |          |         |
| <b>Pain/discomfort</b>    |      |      |      |      | 7.543    | 0.023   |
| No problem                | 8393 | 81.9 | 5283 | 82.1 |          |         |
| Moderate problem          | 1750 | 17.1 | 1059 | 16.4 |          |         |
| Extreme problem           | 104  | 1.0  | 94   | 1.5  |          |         |
| <b>Anxiety/depression</b> |      |      |      |      | 52.078   | <0.001  |
| No problem                | 9111 | 88.9 | 5479 | 85.1 |          |         |
| Moderate problem          | 1047 | 10.2 | 874  | 13.6 |          |         |
| Extreme problem           | 89   | 0.9  | 83   | 1.3  |          |         |

Table 4 Tobit regression analysis on the EQ-5D-3L HSU scores

| Independent variable                                | $\beta$ | SE    | P-value | 95%CI          | Effect Size |
|-----------------------------------------------------|---------|-------|---------|----------------|-------------|
| <b>Age years (ref.:15-44 years)</b>                 |         |       |         |                |             |
| 45-64 years                                         | -0.071  | 0.004 | <0.001  | -0.079, -0.063 | 0.43        |
| ≥65 years                                           | -0.142  | 0.006 | <0.001  | -0.153, -0.130 | 1.26        |
| <b>Gender (ref.: male)</b>                          |         |       |         |                |             |
| Female                                              | -0.025  | 0.004 | <0.001  | -0.033, -0.017 | 0.14        |
| <b>Educational attainment (ref.: illiterate)</b>    |         |       |         |                |             |
| Primary school                                      | 0.016   | 0.004 | <0.001  | 0.009,0.024    | -0.22       |
| Junior high school and above                        | 0.055   | 0.007 | <0.001  | 0.041, 0.069   | -0.40       |
| <b>Employment (ref.: employed)</b>                  |         |       |         |                |             |
| Retired                                             | -0.036  | 0.012 | 0.003   | -0.060, -0.012 | 0.38        |
| Unemployed                                          | -0.073  | 0.005 | <0.001  | -0.082, -0.064 | 0.72        |
| <b>Marital status (ref.: single)</b>                |         |       |         |                |             |
| Married                                             | 0.018   | 0.006 | 0.002   | 0.007,0.029    | 0.07        |
| Separated/divorced/widowed                          | -0.007  | 0.008 | 0.335   | -0.022 0.008   | 0.52        |
| <b>Location (ref.: rural)</b>                       |         |       |         |                |             |
| Urban                                               | 0.039   | 0.005 | <0.001  | 0.029, 0.049   | 0.00        |
| <b>Altitude groups (ref.: 1500-3500m)</b>           |         |       |         |                |             |
| 3500-4000m                                          | 0.028   | 0.005 | <0.001  | 0.019, 0.037   | -0.11       |
| 4000-5000m                                          | 0.011   | 0.004 | 0.017   | 0.002, 0.021   | 0.03        |
| <b>Diseased during the past 2 weeks (ref.: Yes)</b> |         |       |         |                |             |
| No                                                  | 0.042   | 0.005 | <0.001  | 0.033, 0.052   | -0.50       |
| <b>Number of chronic diseases (ref.: 0)</b>         |         |       |         |                |             |
| 1                                                   | -0.083  | 0.004 | <0.001  | -0.091, -0.075 | 0.34        |

1  
2  
3  
4  
5  
6  
7  
8  
9  
10  
11  
12  
13  
14  
15  
16  
17  
18  
19  
20  
21  
22  
23  
24  
25  
26  
27  
28  
29  
30  
31  
32  
33  
34  
35  
36  
37  
38  
39  
40  
41  
42  
43  
44  
45  
46

|                                                         |        |       |        |                |       |
|---------------------------------------------------------|--------|-------|--------|----------------|-------|
| ≥2                                                      | -0.125 | 0.005 | <0.001 | -0.136, -0.115 | 0.13  |
| <b>Smoking (ref.: smoker)</b>                           |        |       |        |                |       |
| Ex-smoker                                               | -0.036 | 0.010 | <0.001 | -0.055, -0.018 | 0.34  |
| Non-smoker                                              | -0.011 | 0.006 | 0.086  | -.0233, 0.002  | 0.13  |
| <b>Weekly physical exercise (ref.: never exercised)</b> |        |       |        |                |       |
| 1–5 times                                               | 0.032  | 0.006 | <0.001 | 0.020, 0.043   | 0.00  |
| ≥6 times                                                | 0.050  | 0.007 | <0.001 | 0.036, 0.064   | -0.13 |
| <b>Year (ref.: 2013)</b>                                |        |       |        |                |       |
| 2018                                                    | -0.014 | 0.004 | <0.001 | -0.022, -0.007 | 0.04  |

For peer review only

## Figure legends

Figure 1 Distribution of participant's health state utility scores in 2013 and 2018

Figure 2a Proportions of health problems reported by participants at different altitude  
in 2013

Figure 2b Proportions of health problems reported by participants at different altitude  
in 2018

For peer review only

1  
2  
3  
4  
5  
6  
7  
8  
9  
10  
11  
12  
13  
14  
15  
16  
17  
18  
19  
20  
21  
22  
23  
24  
25  
26  
27  
28  
29  
30  
31  
32  
33  
34  
35  
36  
37  
38  
39  
40  
41  
42  
43  
44  
45  
46  
47  
48  
49  
50  
51  
52  
53  
54  
55  
56  
57  
58  
59  
60

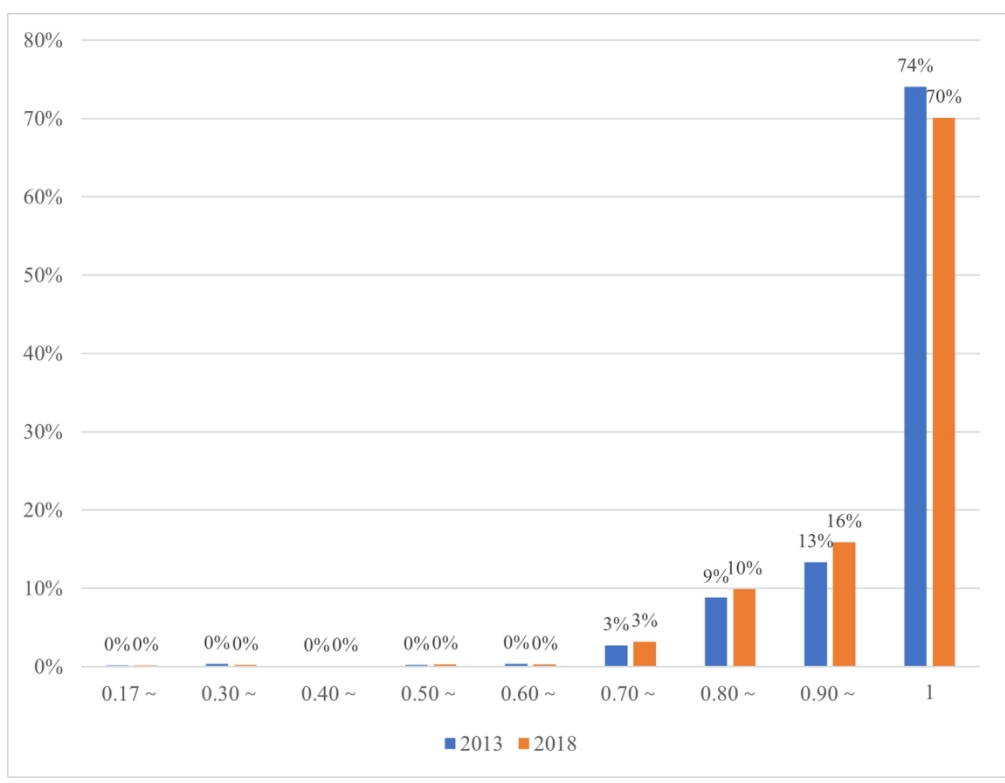

Figure 1 Distribution of participant's health state utility scores in 2013 and 2018

146x111mm (300 x 300 DPI)

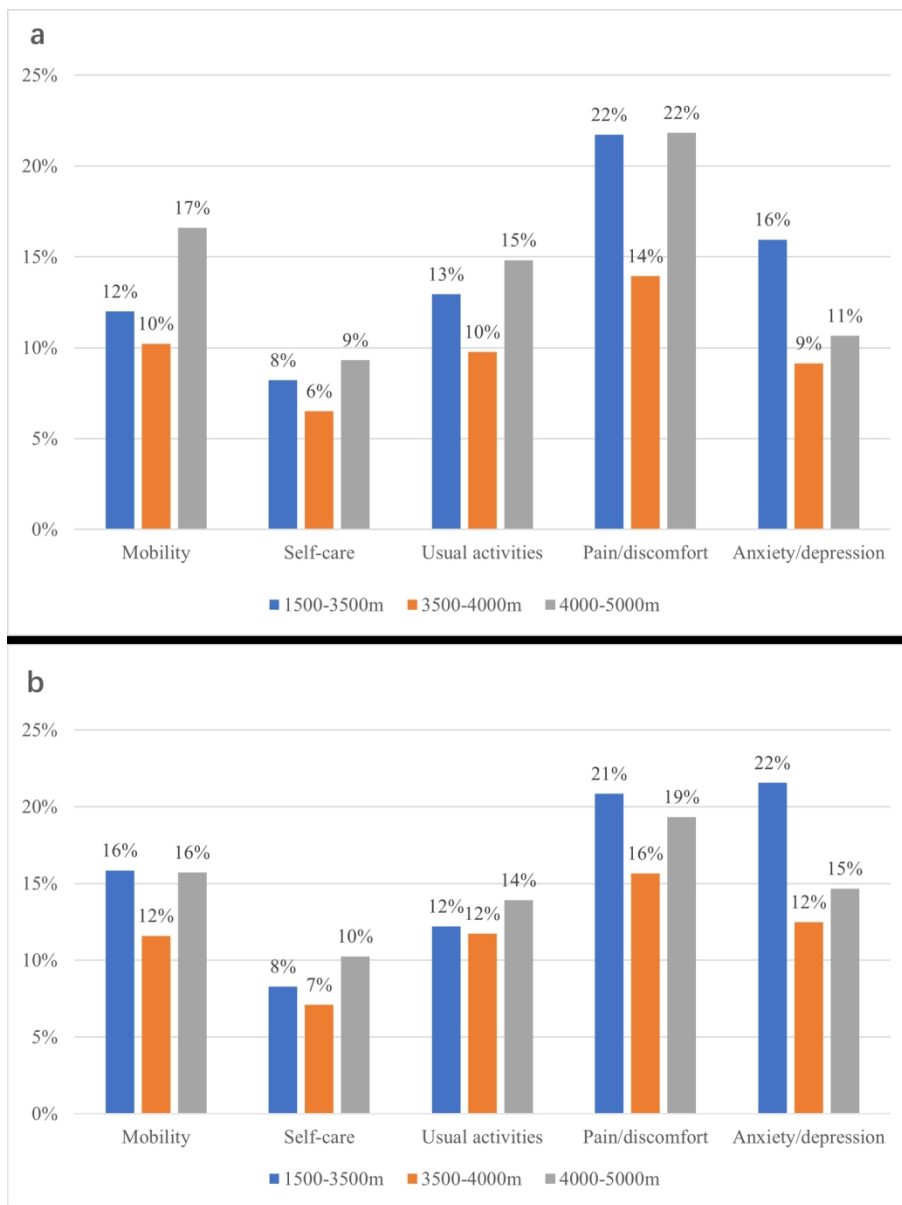

Figure 2a Proportions of health problems reported by participants at different altitude in 2013  
 Figure 2b Proportions of health problems reported by participants at different altitude in 2018

146x193mm (300 x 300 DPI)

1  
2  
3  
4  
5  
6  
7  
8  
9  
10  
11  
12  
13  
14  
15  
16  
17  
18  
19  
20  
21  
22  
23  
24  
25  
26  
27  
28  
29  
30  
31  
32  
33  
34  
35  
36  
37  
38  
39  
40  
41  
42  
43  
44  
45  
46

**Supplementary Table 1 Tobit regression analysis on the EQ-5D-3L HSU scores in different altitudes using 3L<sub>2022</sub> value set**

| Characteristics                                     | Total  |       |         | <3500m |       |         | 3500-4000m |       |         | >4000m |       |         |
|-----------------------------------------------------|--------|-------|---------|--------|-------|---------|------------|-------|---------|--------|-------|---------|
|                                                     | Coe    | SE    | P-value | Coe    | SE    | P-value | Coe        | SE    | P-value | Coe    | SE    | P-value |
| <b>Age years (ref.:15-44 years)</b>                 |        |       |         |        |       |         |            |       |         |        |       |         |
| 45-64 years                                         | -0.032 | 0.002 | <0.001  | -0.040 | 0.005 | <0.001  | -0.027     | 0.003 | <0.001  | -0.039 | 0.004 | <0.001  |
| ≥65 years                                           | -0.113 | 0.004 | <0.001  | -0.111 | 0.009 | <0.001  | -0.096     | 0.005 | <0.001  | -0.136 | 0.007 | <0.001  |
| <b>Gender (ref.: male)</b>                          |        |       |         |        |       |         |            |       |         |        |       |         |
| Female                                              | -0.011 | 0.002 | <0.001  | -0.012 | 0.005 | 0.017   | -0.006     | 0.003 | 0.071   | -0.021 | 0.004 | <0.001  |
| <b>Educational attainment (ref.: illiterate)</b>    |        |       |         |        |       |         |            |       |         |        |       |         |
| Primary school                                      | 0.011  | 0.002 | <0.001  | 0.002  | 0.005 | 0.687   | 0.012      | 0.003 | <0.001  | 0.007  | 0.004 | 0.115   |
| Junior high school and above                        | 0.014  | 0.003 | <0.001  | 0.022  | 0.007 | 0.003   | 0.010      | 0.004 | 0.025   | 0.012  | 0.007 | 0.083   |
| <b>Employment (ref.: employed)</b>                  |        |       |         |        |       |         |            |       |         |        |       |         |
| Retired                                             | -0.008 | 0.007 | 0.301   | -0.025 | 0.015 | 0.086   | 0.011      | 0.010 | 0.282   | -0.030 | 0.020 | 0.133   |
| Unemployed                                          | -0.060 | 0.003 | <0.001  | -0.094 | 0.008 | <0.001  | -0.049     | 0.004 | <0.001  | -0.072 | 0.005 | <0.001  |
| <b>Marital status (ref.: single)</b>                |        |       |         |        |       |         |            |       |         |        |       |         |
| Married                                             | 0.017  | 0.003 | <0.001  | 0.017  | 0.008 | 0.027   | 0.018      | 0.004 | <0.001  | 0.016  | 0.006 | 0.005   |
| Separated/divorced/widowed                          | -0.004 | 0.004 | 0.342   | 0.011  | 0.011 | 0.327   | 0.001      | 0.006 | 0.931   | -0.020 | 0.008 | 0.016   |
| <b>Location (ref.: rural)</b>                       |        |       |         |        |       |         |            |       |         |        |       |         |
| Urban                                               | 0.020  | 0.003 | <0.001  | 0.004  | 0.010 | 0.651   | 0.029      | 0.004 | <0.001  | -0.003 | 0.005 | 0.475   |
| <b>Diseased during the past 2 weeks (ref.: Yes)</b> |        |       |         |        |       |         |            |       |         |        |       |         |
| No                                                  | 0.036  | 0.003 | <0.001  | 0.028  | 0.007 | <0.001  | 0.048      | 0.005 | <0.001  | 0.027  | 0.005 | <0.001  |
| <b>Number of chronic diseases (ref.: 0)</b>         |        |       |         |        |       |         |            |       |         |        |       |         |
| 1                                                   | -0.039 | 0.002 | <0.001  | -0.030 | 0.006 | <0.001  | -0.045     | 0.003 | <0.001  | -0.030 | 0.004 | <0.001  |
| ≥2                                                  | -0.083 | 0.003 | <0.001  | -0.063 | 0.008 | <0.001  | -0.093     | 0.005 | <0.001  | -0.072 | 0.006 | <0.001  |
| <b>Smoking (ref.: smoker)</b>                       |        |       |         |        |       |         |            |       |         |        |       |         |



|                                                           |        |       |        |        |       |       |        |       |        |        |       |       |
|-----------------------------------------------------------|--------|-------|--------|--------|-------|-------|--------|-------|--------|--------|-------|-------|
| Ex-smoker                                                 | -0.012 | 0.005 | 0.029  | 0.015  | 0.014 | 0.274 | 0.001  | 0.008 | 0.935  | -0.028 | 0.009 | 0.002 |
| Non-smoker                                                | -0.003 | 0.003 | 0.314  | -0.009 | 0.007 | 0.214 | -0.002 | 0.004 | 0.669  | -0.002 | 0.006 | 0.800 |
| <b>Weekly physical activities (ref.: never exercised)</b> |        |       |        |        |       |       |        |       |        |        |       |       |
| 1–5 times                                                 | 0.019  | 0.003 | <0.001 | 0.009  | 0.008 | 0.241 | 0.024  | 0.004 | <0.001 | 0.003  | 0.006 | 0.664 |
| ≥6 times                                                  | 0.028  | 0.004 | <0.001 | 0.026  | 0.009 | 0.007 | 0.026  | 0.005 | <0.001 | 0.022  | 0.007 | 0.002 |

Note: Coe, coefficient; SE, standard error.

# Reporting checklist for cross sectional study.

Based on the STROBE cross sectional guidelines.

## Instructions to authors

Complete this checklist by entering the page numbers from your manuscript where readers will find each of the items listed below.

Your article may not currently address all the items on the checklist. Please modify your text to include the missing information. If you are certain that an item does not apply, please write "n/a" and provide a short explanation.

Upload your completed checklist as an extra file when you submit to a journal.

In your methods section, say that you used the STROBE cross sectional reporting guidelines, and cite them as:

von Elm E, Altman DG, Egger M, Pocock SJ, Gotsche PC, Vandembroucke JP. The Strengthening the Reporting of Observational Studies in Epidemiology (STROBE) Statement: guidelines for reporting observational studies.

|                           |                                                                                                        | Page   |
|---------------------------|--------------------------------------------------------------------------------------------------------|--------|
|                           | Reporting Item                                                                                         | Number |
| <b>Title and abstract</b> |                                                                                                        |        |
| Title                     | <a href="#">#1a</a> Indicate the study's design with a commonly used term in the title or the abstract | P1,2   |

|    |                      |                     |                                                                 |       |
|----|----------------------|---------------------|-----------------------------------------------------------------|-------|
| 1  | Abstract             | <a href="#">#1b</a> | Provide in the abstract an informative and balanced summary     | P2    |
| 2  |                      |                     | of what was done and what was found                             |       |
| 3  |                      |                     |                                                                 |       |
| 4  |                      |                     |                                                                 |       |
| 5  |                      |                     |                                                                 |       |
| 6  | <b>Introduction</b>  |                     |                                                                 |       |
| 7  |                      |                     |                                                                 |       |
| 8  |                      |                     |                                                                 |       |
| 9  |                      |                     |                                                                 |       |
| 10 | Background /         | <a href="#">#2</a>  | Explain the scientific background and rationale for the         | P4-5  |
| 11 | rationale            |                     | investigation being reported                                    |       |
| 12 |                      |                     |                                                                 |       |
| 13 |                      |                     |                                                                 |       |
| 14 |                      |                     |                                                                 |       |
| 15 | Objectives           | <a href="#">#3</a>  | State specific objectives, including any prespecified           | P5    |
| 16 |                      |                     | hypotheses                                                      |       |
| 17 |                      |                     |                                                                 |       |
| 18 |                      |                     |                                                                 |       |
| 19 |                      |                     |                                                                 |       |
| 20 | <b>Methods</b>       |                     |                                                                 |       |
| 21 |                      |                     |                                                                 |       |
| 22 |                      |                     |                                                                 |       |
| 23 | Study design         | <a href="#">#4</a>  | Present key elements of study design early in the paper         | P6-7  |
| 24 |                      |                     |                                                                 |       |
| 25 |                      |                     |                                                                 |       |
| 26 | Setting              | <a href="#">#5</a>  | Describe the setting, locations, and relevant dates, including  | P6    |
| 27 |                      |                     | periods of recruitment, exposure, follow-up, and data           |       |
| 28 |                      |                     | collection                                                      |       |
| 29 |                      |                     |                                                                 |       |
| 30 |                      |                     |                                                                 |       |
| 31 |                      |                     |                                                                 |       |
| 32 |                      |                     |                                                                 |       |
| 33 |                      |                     |                                                                 |       |
| 34 | Eligibility criteria | <a href="#">#6a</a> | Give the eligibility criteria, and the sources and methods of   | P7    |
| 35 |                      |                     | selection of participants.                                      |       |
| 36 |                      |                     |                                                                 |       |
| 37 |                      |                     |                                                                 |       |
| 38 |                      |                     |                                                                 |       |
| 39 |                      |                     |                                                                 |       |
| 40 |                      | <a href="#">#7</a>  | Clearly define all outcomes, exposures, predictors, potential   | P7    |
| 41 |                      |                     | confounders, and effect modifiers. Give diagnostic criteria, if |       |
| 42 |                      |                     | applicable                                                      |       |
| 43 |                      |                     |                                                                 |       |
| 44 |                      |                     |                                                                 |       |
| 45 |                      |                     |                                                                 |       |
| 46 |                      |                     |                                                                 |       |
| 47 | Data sources /       | <a href="#">#8</a>  | For each variable of interest give sources of data and details  | P8-10 |
| 48 | measurement          |                     | of methods of assessment (measurement). Describe                |       |
| 49 |                      |                     | comparability of assessment methods if there is more than       |       |
| 50 |                      |                     | one group. Give information separately for for exposed and      |       |
| 51 |                      |                     | unexposed groups if applicable.                                 |       |
| 52 |                      |                     |                                                                 |       |
| 53 |                      |                     |                                                                 |       |
| 54 |                      |                     |                                                                 |       |
| 55 |                      |                     |                                                                 |       |
| 56 |                      |                     |                                                                 |       |
| 57 |                      |                     |                                                                 |       |
| 58 |                      |                     |                                                                 |       |
| 59 |                      |                     |                                                                 |       |
| 60 |                      |                     |                                                                 |       |

|    |                |                      |                                                               |        |
|----|----------------|----------------------|---------------------------------------------------------------|--------|
| 1  | Bias           | <a href="#">#9</a>   | Describe any efforts to address potential sources of bias     | P6     |
| 2  |                |                      |                                                               |        |
| 3  |                |                      |                                                               |        |
| 4  | Study size     | <a href="#">#10</a>  | Explain how the study size was arrived at                     | P6     |
| 5  |                |                      |                                                               |        |
| 6  |                |                      |                                                               |        |
| 7  | Quantitative   | <a href="#">#11</a>  | Explain how quantitative variables were handled in the        | P6-7   |
| 8  | variables      |                      | analyses. If applicable, describe which groupings were        |        |
| 9  |                |                      | chosen, and why                                               |        |
| 10 |                |                      |                                                               |        |
| 11 |                |                      |                                                               |        |
| 12 |                |                      |                                                               |        |
| 13 |                |                      |                                                               |        |
| 14 |                |                      |                                                               |        |
| 15 | Statistical    | <a href="#">#12a</a> | Describe all statistical methods, including those used to     | P10-11 |
| 16 | methods        |                      | control for confounding                                       |        |
| 17 |                |                      |                                                               |        |
| 18 |                |                      |                                                               |        |
| 19 |                |                      |                                                               |        |
| 20 | Statistical    | <a href="#">#12b</a> | Describe any methods used to examine subgroups and            | P10    |
| 21 | methods        |                      | interactions                                                  |        |
| 22 |                |                      |                                                               |        |
| 23 |                |                      |                                                               |        |
| 24 |                |                      |                                                               |        |
| 25 |                |                      |                                                               |        |
| 26 | Statistical    | <a href="#">#12c</a> | Explain how missing data were addressed                       | P10    |
| 27 | methods        |                      |                                                               |        |
| 28 |                |                      |                                                               |        |
| 29 |                |                      |                                                               |        |
| 30 |                |                      |                                                               |        |
| 31 | Statistical    | <a href="#">#12d</a> | If applicable, describe analytical methods taking account of  | P10-11 |
| 32 | methods        |                      | sampling strategy                                             |        |
| 33 |                |                      |                                                               |        |
| 34 |                |                      |                                                               |        |
| 35 |                |                      |                                                               |        |
| 36 | Statistical    | <a href="#">#12e</a> | Describe any sensitivity analyses                             | P10-11 |
| 37 | methods        |                      |                                                               |        |
| 38 |                |                      |                                                               |        |
| 39 |                |                      |                                                               |        |
| 40 |                |                      |                                                               |        |
| 41 |                |                      |                                                               |        |
| 42 | <b>Results</b> |                      |                                                               |        |
| 43 |                |                      |                                                               |        |
| 44 |                |                      |                                                               |        |
| 45 | Participants   | <a href="#">#13a</a> | Report numbers of individuals at each stage of study—eg       | P7     |
| 46 |                |                      | numbers potentially eligible, examined for eligibility,       |        |
| 47 |                |                      | confirmed eligible, included in the study, completing follow- |        |
| 48 |                |                      | up, and analysed. Give information separately for for         |        |
| 49 |                |                      | exposed and unexposed groups if applicable.                   |        |
| 50 |                |                      |                                                               |        |
| 51 |                |                      |                                                               |        |
| 52 |                |                      |                                                               |        |
| 53 |                |                      |                                                               |        |
| 54 |                |                      |                                                               |        |
| 55 |                |                      |                                                               |        |
| 56 |                |                      |                                                               |        |
| 57 | Participants   | <a href="#">#13b</a> | Give reasons for non-participation at each stage              | P6     |
| 58 |                |                      |                                                               |        |
| 59 |                |                      |                                                               |        |
| 60 |                |                      |                                                               |        |

|    |                   |                      |                                                                   |        |
|----|-------------------|----------------------|-------------------------------------------------------------------|--------|
| 1  | Participants      | <a href="#">#13c</a> | Consider use of a flow diagram                                    | n/a    |
| 2  |                   |                      |                                                                   |        |
| 3  |                   |                      |                                                                   |        |
| 4  | Descriptive data  | <a href="#">#14a</a> | Give characteristics of study participants (eg demographic,       | P8     |
| 5  |                   |                      | clinical, social) and information on exposures and potential      |        |
| 6  |                   |                      | confounders. Give information separately for exposed and          |        |
| 7  |                   |                      | unexposed groups if applicable.                                   |        |
| 8  |                   |                      |                                                                   |        |
| 9  |                   |                      |                                                                   |        |
| 10 |                   |                      |                                                                   |        |
| 11 |                   |                      |                                                                   |        |
| 12 |                   |                      |                                                                   |        |
| 13 |                   |                      |                                                                   |        |
| 14 | Descriptive data  | <a href="#">#14b</a> | Indicate number of participants with missing data for each        | P11    |
| 15 |                   |                      | variable of interest                                              |        |
| 16 |                   |                      |                                                                   |        |
| 17 |                   |                      |                                                                   |        |
| 18 |                   |                      |                                                                   |        |
| 19 | Outcome data      | <a href="#">#15</a>  | Report numbers of outcome events or summary measures.             | P11-12 |
| 20 |                   |                      | Give information separately for exposed and unexposed             |        |
| 21 |                   |                      | groups if applicable.                                             |        |
| 22 |                   |                      |                                                                   |        |
| 23 |                   |                      |                                                                   |        |
| 24 |                   |                      |                                                                   |        |
| 25 |                   |                      |                                                                   |        |
| 26 |                   |                      |                                                                   |        |
| 27 | Main results      | <a href="#">#16a</a> | Give unadjusted estimates and, if applicable, confounder-         | P12-13 |
| 28 |                   |                      | adjusted estimates and their precision (eg, 95% confidence        |        |
| 29 |                   |                      | interval). Make clear which confounders were adjusted for         |        |
| 30 |                   |                      | and why they were included                                        |        |
| 31 |                   |                      |                                                                   |        |
| 32 |                   |                      |                                                                   |        |
| 33 |                   |                      |                                                                   |        |
| 34 |                   |                      |                                                                   |        |
| 35 |                   |                      |                                                                   |        |
| 36 |                   |                      |                                                                   |        |
| 37 | Main results      | <a href="#">#16b</a> | Report category boundaries when continuous variables were         | P12-13 |
| 38 |                   |                      | categorized                                                       |        |
| 39 |                   |                      |                                                                   |        |
| 40 |                   |                      |                                                                   |        |
| 41 |                   |                      |                                                                   |        |
| 42 | Main results      | <a href="#">#16c</a> | If relevant, consider translating estimates of relative risk into | n/a    |
| 43 |                   |                      | absolute risk for a meaningful time period                        |        |
| 44 |                   |                      |                                                                   |        |
| 45 |                   |                      |                                                                   |        |
| 46 |                   |                      |                                                                   |        |
| 47 |                   |                      |                                                                   |        |
| 48 | Other analyses    | <a href="#">#17</a>  | Report other analyses done—e.g., analyses of subgroups            | P12-13 |
| 49 |                   |                      | and interactions, and sensitivity analyses                        |        |
| 50 |                   |                      |                                                                   |        |
| 51 |                   |                      |                                                                   |        |
| 52 |                   |                      |                                                                   |        |
| 53 | <b>Discussion</b> |                      |                                                                   |        |
| 54 |                   |                      |                                                                   |        |
| 55 |                   |                      |                                                                   |        |
| 56 | Key results       | <a href="#">#18</a>  | Summarise key results with reference to study objectives          | P13    |
| 57 |                   |                      |                                                                   |        |
| 58 |                   |                      |                                                                   |        |
| 59 |                   |                      |                                                                   |        |
| 60 |                   |                      |                                                                   |        |

|    |                          |                     |                                                                |        |
|----|--------------------------|---------------------|----------------------------------------------------------------|--------|
| 1  | Limitations              | <a href="#">#19</a> | Discuss limitations of the study, taking into account sources  | P18    |
| 2  |                          |                     | of potential bias or imprecision. Discuss both direction and   |        |
| 3  |                          |                     | magnitude of any potential bias.                               |        |
| 4  |                          |                     |                                                                |        |
| 5  |                          |                     |                                                                |        |
| 6  |                          |                     |                                                                |        |
| 7  |                          |                     |                                                                |        |
| 8  |                          |                     |                                                                |        |
| 9  | Interpretation           | <a href="#">#20</a> | Give a cautious overall interpretation considering objectives, | P14-18 |
| 10 |                          |                     | limitations, multiplicity of analyses, results from similar    |        |
| 11 |                          |                     | studies, and other relevant evidence.                          |        |
| 12 |                          |                     |                                                                |        |
| 13 |                          |                     |                                                                |        |
| 14 |                          |                     |                                                                |        |
| 15 |                          |                     |                                                                |        |
| 16 | Generalisability         | <a href="#">#21</a> | Discuss the generalisability (external validity) of the study  | P18    |
| 17 |                          |                     | results.                                                       |        |
| 18 |                          |                     |                                                                |        |
| 19 |                          |                     |                                                                |        |
| 20 |                          |                     |                                                                |        |
| 21 |                          |                     |                                                                |        |
| 22 | <b>Other Information</b> |                     |                                                                |        |
| 23 |                          |                     |                                                                |        |
| 24 |                          |                     |                                                                |        |
| 25 | Funding                  | <a href="#">#22</a> | Give the source of funding and the role of the funders for the | P19    |
| 26 |                          |                     | present study and, if applicable, for the original study on    |        |
| 27 |                          |                     | which the present article is based                             |        |
| 28 |                          |                     |                                                                |        |
| 29 |                          |                     |                                                                |        |
| 30 |                          |                     |                                                                |        |
| 31 |                          |                     |                                                                |        |
| 32 |                          |                     |                                                                |        |

33 The STROBE checklist is distributed under the terms of the Creative Commons Attribution License  
34 CC-BY. This checklist was completed on 14. February 2023 using <https://www.goodreports.org/>, a  
35 tool made by the [EQUATOR Network](#) in collaboration with [Penelope.ai](#)  
36  
37  
38  
39  
40  
41  
42  
43  
44  
45  
46  
47  
48  
49  
50  
51  
52  
53  
54  
55  
56  
57  
58  
59  
60

# BMJ Open

## Health-Related Quality of Life and its changes of Tibetan population in China: Based on the 2013 and 2018 National Health Services Surveys

|                                 |                                                                                                                                                                                                                                                                                                                                                                                                                                                                                                                                                                                                                                                                                                                                                                                                                                                                                                                                                                                                                                                                                                                                                                                                                                                                              |
|---------------------------------|------------------------------------------------------------------------------------------------------------------------------------------------------------------------------------------------------------------------------------------------------------------------------------------------------------------------------------------------------------------------------------------------------------------------------------------------------------------------------------------------------------------------------------------------------------------------------------------------------------------------------------------------------------------------------------------------------------------------------------------------------------------------------------------------------------------------------------------------------------------------------------------------------------------------------------------------------------------------------------------------------------------------------------------------------------------------------------------------------------------------------------------------------------------------------------------------------------------------------------------------------------------------------|
| Journal:                        | <i>BMJ Open</i>                                                                                                                                                                                                                                                                                                                                                                                                                                                                                                                                                                                                                                                                                                                                                                                                                                                                                                                                                                                                                                                                                                                                                                                                                                                              |
| Manuscript ID                   | bmjopen-2023-072854.R2                                                                                                                                                                                                                                                                                                                                                                                                                                                                                                                                                                                                                                                                                                                                                                                                                                                                                                                                                                                                                                                                                                                                                                                                                                                       |
| Article Type:                   | Original research                                                                                                                                                                                                                                                                                                                                                                                                                                                                                                                                                                                                                                                                                                                                                                                                                                                                                                                                                                                                                                                                                                                                                                                                                                                            |
| Date Submitted by the Author:   | 24-Oct-2023                                                                                                                                                                                                                                                                                                                                                                                                                                                                                                                                                                                                                                                                                                                                                                                                                                                                                                                                                                                                                                                                                                                                                                                                                                                                  |
| Complete List of Authors:       | Dou, Lei; Shandong University, Centre for Health Management and Policy Research, School of Public Health, Cheeloo College of Medicine; NHC Key Lab of Health Economics and Policy Research (Shandong University)<br>Shi, Zhao; Shandong University, Centre for Health Management and Policy Research, School of Public Health, Cheeloo College of Medicine; NHC Key Lab of Health Economics and Policy Research (Shandong University)<br>Zhaxi, Cuomu; Tibet University, Medical College; Tibet University, Center of Tibetan Studies (Everest Research Institute)<br>Cidan, Zhuoga; Tibet University, Medical College; Tibet University, Center of Tibetan Studies (Everest Research Institute)<br>Li, Chaofan; Shandong University, Centre for Health Management and Policy Research, School of Public Health, Cheeloo College of Medicine; NHC Key Lab of Health Economics and Policy Research (Shandong University)<br>Zhaxi, Dawa; Tibet University, Medical College; Tibet University, Center of Tibetan Studies (Everest Research Institute)<br>Li, Shun-Ping; Shandong University, Centre for Health Management and Policy Research, School of Public Health, Cheeloo College of Medicine; NHC Key Lab of Health Economics and Policy Research (Shandong University) |
| <b>Primary Subject Heading</b>: | Global health                                                                                                                                                                                                                                                                                                                                                                                                                                                                                                                                                                                                                                                                                                                                                                                                                                                                                                                                                                                                                                                                                                                                                                                                                                                                |
| Secondary Subject Heading:      | Public health, Health policy, Global health                                                                                                                                                                                                                                                                                                                                                                                                                                                                                                                                                                                                                                                                                                                                                                                                                                                                                                                                                                                                                                                                                                                                                                                                                                  |
| Keywords:                       | PUBLIC HEALTH, Quality of Life, China                                                                                                                                                                                                                                                                                                                                                                                                                                                                                                                                                                                                                                                                                                                                                                                                                                                                                                                                                                                                                                                                                                                                                                                                                                        |
|                                 |                                                                                                                                                                                                                                                                                                                                                                                                                                                                                                                                                                                                                                                                                                                                                                                                                                                                                                                                                                                                                                                                                                                                                                                                                                                                              |

SCHOLARONE™  
Manuscripts



I, the Submitting Author has the right to grant and does grant on behalf of all authors of the Work (as defined in the below author licence), an exclusive licence and/or a non-exclusive licence for contributions from authors who are: i) UK Crown employees; ii) where BMJ has agreed a CC-BY licence shall apply, and/or iii) in accordance with the terms applicable for US Federal Government officers or employees acting as part of their official duties; on a worldwide, perpetual, irrevocable, royalty-free basis to BMJ Publishing Group Ltd ("BMJ") its licensees and where the relevant Journal is co-owned by BMJ to the co-owners of the Journal, to publish the Work in this journal and any other BMJ products and to exploit all rights, as set out in our [licence](#).

The Submitting Author accepts and understands that any supply made under these terms is made by BMJ to the Submitting Author unless you are acting as an employee on behalf of your employer or a postgraduate student of an affiliated institution which is paying any applicable article publishing charge ("APC") for Open Access articles. Where the Submitting Author wishes to make the Work available on an Open Access basis (and intends to pay the relevant APC), the terms of reuse of such Open Access shall be governed by a Creative Commons licence – details of these licences and which [Creative Commons](#) licence will apply to this Work are set out in our licence referred to above.

Other than as permitted in any relevant BMJ Author's Self Archiving Policies, I confirm this Work has not been accepted for publication elsewhere, is not being considered for publication elsewhere and does not duplicate material already published. I confirm all authors consent to publication of this Work and authorise the granting of this licence.



## Title page

**Title:** Health-Related Quality of Life and its changes of Tibetan population in China: Based on the 2013 and 2018 National Health Services Surveys

**Authors:**

Lei Dou<sup>1,2,3</sup>, Zhao Shi<sup>1,2,3</sup>, Zhaxi Cuomu<sup>4,5</sup>, Cidan Zhuoga<sup>4,5</sup>, Chaofan Li<sup>1,2,3</sup>, Zhaxi Dawa<sup>4,5\*</sup>, Shunping Li<sup>1,2,3\*</sup>

**Affiliations:**

<sup>1</sup> Centre for Health Management and Policy Research, School of Public Health, Cheeloo College of Medicine, Shandong University, Jinan, China

<sup>2</sup> NHC Key Lab of Health Economics and Policy Research (Shandong University), Jinan, China

<sup>3</sup> Center for Health Preference Research, Shandong University, Jinan, China

<sup>4</sup> Medical College of Tibet University, Lhasa, China

<sup>5</sup> Center of Tibetan Studies (Everest Research Institute), Tibet University, Lhasa, China

**\*Corresponding author:**

Shunping Li and Zhaxi Dawa are co- corresponding author.

Shunping Li: lishunping@sdu.edu.cn;

Zhaxi Dawa: 904397981@qq.com

# Health-Related Quality of Life and its changes of Tibetan population in China:

## Based on the 2013 and 2018 National Health Services Surveys

### Abstract

**Objective:** Health-related quality of life (HRQoL) was an important health outcome measure for evaluating individual's overall health status. However, there was limited in the literature on HRQoL and its long-term changes of Tibetan population. This study aimed to assess HRQoL of Tibetan and its changes over time, and explore the differences in HRQoL for residents at different altitudes.

**Design:** Data for the cross-sectional study were extracted from the fifth and sixth waves of the National Health Services Surveys (NHSS) which conducted in 2013 and 2018. A multi-stage stratified cluster random sampling strategy was used to select representative participants.

**Setting:** Tibet Autonomous Region in China.

**Participants:** This study recruited 14752 participants in 2013 and 13106 participants in 2018, and after excluding observations with missing values for key variables, 10247 in 2013 and 6436 in 2018 were included in the study analysis.

**Primary and secondary outcome measures:** The EQ-5D-3L was used to measure participants' HRQoL.

**Results:** The mean health state utility (HSU) scores of the participants were  $0.969 \pm 0.078$  and  $0.966 \pm 0.077$  in 2013 and 2018, respectively. Pain/discomfort was the most frequently prevalent issue reported in 18.1% and 17.9% of the participants in 2013 and 2018, respectively. Tibetans living 3500–4000 m altitude had the best HRQoL. Age, sex, employment status, educational attainment, chronic disease, and weekly physical exercise were influencing factors associated with HRQoL.

**Conclusions:** The HRQoL of Tibetan population was lower than general Chinese population, and decreased over time between 5 years. There were differences in HRQoL among Tibetan at different altitudes, with residents living at 3500-4000m having the best quality of life. More attention should be paid to those Tibetans who are older, female, unemployed and without formal education.

### Strengths and limitations of this study

- We used Tibetan resident data from two National Health Service Surveys conducted in 2013 and 2018.
- This is the first study to assess the health-related quality of life and its changes of Tibetan over time.
- We divided the residents into three different altitude groups based on the international altitude standard and analysed the differences in HRQoL for residents at different altitudes.

- The same pool of participants was not characterized in the two surveys; however, some overlap may exist.

For peer review only

## Introduction

Health-related quality of life (HRQoL) is considered an important health outcome measure in recent years to inform patient-centred care, clinical decision-making, health policy and reimbursement decisions[1]. HRQoL refers to the impact of health on the quality of life of individuals focusing on individuals' health influencing their goals, expectations, standards, and concerns. It is a multidimensional concept referring to people's physical, mental, and social domains of well-being, as well as personal beliefs, level of independence, and their relationships with the environment[2]. The HRQoL of the residents in a region could be measured through the health surveys for the resident population[3]. The HRQoL can be evaluated by generic preference-based measures (GPBMs), which provide a standardized health state classification system and a tariff of quality weights for all health states described by the classification system[4]. The EuroQol5-Dimensions (EQ-5D) is the most widely used GPBMs to measure and evaluate HRQoL in population surveys, clinical studies, and economic evaluations[5]. The EQ-5D-3L was included in the 2008 National Health Services Surveys (NHSS) for the first time to assess the population health status in China.

The Tibet Autonomous Region (TAR), located on the Qinghai-Tibet plateau in southwest China with an average altitude of 4000 m above sea level, is commonly referred to as the "Roof of the World"[6]. The TAR has an area of > 1.2 million km<sup>2</sup>, accounting for one-eighth of China's geographic area. In 2021, the population in TAR was 3.65 million with 90% of the population being Tibetan[7]. Its social and economic development levels are relatively low among China's provinces. Most of the TAR

1  
2  
3  
4 population comprises of farmers and herders, scattered in remote rural areas with  
5  
6 limited income source mainly depending on agriculture[8]. High-altitude areas present  
7  
8 a complex ecology in physical environment and population characteristics including  
9  
10 genetics, lifestyle, socioeconomic factors, and access to medical care[9], directly or  
11  
12 indirectly impact health[10]. Previous studies have reported that high-altitude is  
13  
14 strongly associated with the many health issues including psychiatric disorders [11, 12],  
15  
16 hypertension[6, 13], and cardiovascular diseases[10]. China has been undergoing a  
17  
18 period of unprecedented rates of economic growth, development, and poverty reduction  
19  
20 in recent decades, including the TAR[14]. Various economic, educational, and health  
21  
22 policies have been implemented for the development of society, which may have  
23  
24 greatly affected the health of residents living in TAR[15].  
25  
26  
27  
28  
29  
30  
31

32  
33 Previous studies have assessed the population HRQoL in various provinces of  
34  
35 China, such as Heilongjiang [16], Gansu [17], Shanxi [18], and Hunan[19]. However,  
36  
37 these studies focused on low-altitude areas and used data only from a cross-sectional  
38  
39 survey. Moreover, there are only two studies have assessed the change in HRQoL over  
40  
41 time in the general population of mainland China[20, 21]. One study used the data from  
42  
43 two waves of NHSS from 2008 to 2013[20], while another study used three waves of  
44  
45 Health Services Surveys from 2008 to 2020 in Tianjin[21]. Both studies reported a  
46  
47 slightly decreasing in HRQoL of the population and disparities in HRQoL across  
48  
49 different demographic and socioeconomic subgroups in China. Additionally, previous  
50  
51 studies on the health status of Tibetan population are limited due to the geographical  
52  
53 environment, lack of basic resources and facilities, and low population density.  
54  
55  
56  
57  
58  
59  
60

Therefore, this study aimed to assess the HRQoL of Tibetan population and its changes over time, and explore the differences in HRQoL for residents at different altitudes.

## Methods

### Study design and population

Data for the cross-sectional study were extracted from the fifth and sixth waves of the NHSS in Tibet, which were conducted in 2013 and 2018. A multi-stage stratified cluster random sampling strategy was used to select representative participants. Each stage had a systematic random sampling approach. In the first stage, 24 counties were selected in 2013 and 25 counties were selected in 2018 from the seven cities in Tibet in proportion to their population size. In the second stage, 60 towns/sub-districts selected in 2013 and 59 towns/sub-districts were selected in 2018 using the random cluster method according to population size. In the third stage, three villages/communities were randomly selected from each town or sub-district, and 155 villages/communities were selected in 2013 and 159 villages/communities were selected in 2018. The majority of the counties, towns/ sub-districts, villages/communities sampled in 2018 were the same as those sampled in 2013. In the fourth stage, 20 households from each village of community were randomly selected for participation, and 4140 households were selected in 2013 and 4232 households were selected in 2018.

Questionnaires were administered to the participants through face-to-face interviews. The students majoring in Preventive Medicine at Medical College of Tibet University were uniformly recruited and trained to be interviewers by supervisors who had

1  
2  
3  
4 participated in national training. Pre-survey training workshops were offered to all  
5  
6 interviewers following a standardised protocol. Eligible interviewers had to  
7  
8 demonstrate proper understanding of the purpose of the NHSS and their ability to meet  
9  
10 data collection standards developed by the Centre for Health Statistics and Information.  
11  
12 The interviewers visited the selected households, and all family members in a sampled  
13  
14 household were eligible to participate in the survey. Before the survey commenced,  
15  
16 participants were informed of the survey's purposes and procedure and then provided  
17  
18 informed consent.  
19  
20  
21  
22  
23

24  
25 In total, 14752 participants in 2013 and 13106 participants in 2018 completed the  
26  
27 survey. The exclusion criteria in this study were as follows: (1) participants aged < 15  
28  
29 years were excluded since the EQ-5D-3L is recommended to be used among  $\geq 15$   
30  
31 years by the user guide (n=3412 in 2013 and n=2677 in 2018); (2) participants who did  
32  
33 not answer the questionnaires by themselves were excluded since the EQ-5D-3L need  
34  
35 to be self-complete (n=1001 in 2013 and n=3798 in 2018); (3) participants with missing  
36  
37 values for key variables including socio-demographic characteristics were excluded  
38  
39 (n=4 in 2013 and n=1 in 2018); (4) participants with ethnicities other than Tibetan were  
40  
41 excluded (n=88 in 2013 and n=194 in 2018). Overall, final sample size of 10247 in  
42  
43 2013 and 6436 in 2018 were included in this study for analysis.  
44  
45  
46  
47  
48  
49

## 50 51 **Measurement of HRQoL**

52  
53 The EQ-5D-3L is one of the most widely used HRQoL measurement instruments  
54  
55 classified into five dimensions: mobility (MO), self-care (SC), usual activities (UA),  
56  
57 pain/discomfort (PD), and anxiety/depression (AD). Each dimension contains three  
58  
59  
60

1  
2  
3  
4 functioning response levels (no problems, moderate problems, and extreme problems),  
5  
6 generating 243 ( $3^5$ ) possible health states, with the best state indicated by the response  
7  
8 “11111” and the worst health state indicated by the response “33333”[22]. A single  
9  
10 health state utility (HSU) score can be assigned to each health state using a value set,  
11  
12 developed in a valuation study based on the general population’s health preferences.  
13  
14

15  
16  
17 Four value sets exist for the EQ-5D-3L in China with the first value set developed in  
18  
19 2014 (3L<sub>2014</sub> value set) using a sample comprising residents mainly from urban  
20  
21 areas[23], the second value set developed in 2018 (3L<sub>2018</sub> value set) adopted a more  
22  
23 representative sample of residents from both rural and urban areas[24], the other two  
24  
25 value set developed in 2022 (3L<sub>2022</sub> value set) recruited participants from rural areas of  
26  
27 five cities[25]. In this study, we chose to adopt the 3L<sub>2018</sub> value set. The main reason  
28  
29 for the choice was based on the participants in the 3L<sub>2014</sub> value set being selected  
30  
31 conveniently from big cities in urban areas through quota sampling. While the  
32  
33 3L<sub>2018</sub> value set, a more representative sample of respondents was obtained from both  
34  
35 rural and urban areas using a random sampling method[26]. The rural population  
36  
37 accounts for half of the Chinese population, and large disparities exist in socioeconomic  
38  
39 status, lifestyle, and health status between urban and rural areas in China[27]. In the  
40  
41 two waves of NHSS in the TAR, more than 75% of participants were from farming and  
42  
43 pastoral areas. Therefore, the 3L<sub>2018</sub> value set, which more closely matches the  
44  
45 distribution of the Tibetan population, was used in this study. To evaluate the robustness  
46  
47 and sensitivity of the 3L<sub>2018</sub> value set, we also used the 3L<sub>2022</sub> value set to analyse the  
48  
49 main results revealing that the main results of the two value sets had the same trends  
50  
51  
52  
53  
54  
55  
56  
57  
58  
59  
60



(Supplementary Table 1).

### **Independent variables**

In this study, the independent variables were sociodemographic, altitude-related, and clinical disease variables, and health-related behaviours. Sociodemographic variables were sex, age, employment status, educational attainment, and marital status. We divided age into three groups: 15–44, 45–65, and  $\geq 65$  years old. Employment status was divided into employed, retired, and unemployed. Educational attainment was divided into three groups: illiterate, primary school, junior high school, and above. Marital status was divided into single, married, divorced, and other.

The altitude-related variables included location and altitude. The participants were divided into rural and urban groups based on their geographical location. The NHSS did not collect data on the altitude of their residence; therefore, we used Google Maps to obtain the precise altitude. Altitudes were defined as high (1500–3500 m), very high (3500–5500 m), and extreme altitude ( $>5500$  m), as suggested by the International Society for Mountain Medicine[28]. The average altitude of Tibet is above 4000 m, and the high altitude (3500–5000 m) and extreme altitude areas ( $> 5000$  m) account for 93.69% of the land area of the TAR[29]. The altitude range of the two surveys was 1974~4936 m, and the average altitude was  $3863 \pm 515$  m, with no extreme altitude areas. In addition, we considered the number of villages and participants in different altitude groupings. Therefore, we divided the plateau areas into three altitude groups, high (1500–3500 m), very high (3500–4000 m), and extreme altitude (4000–5000 m) based on the China's policy of subsidizing plateau areas in this study [30]. The altitude

1  
2  
3  
4 classification criterion was consistent in two waves of surveys.  
5

6 The clinical disease variables included diagnosis of the participant with any illness  
7 within two weeks before survey and the number of chronic diseases during the past six  
8 months. A chronic condition was defined as a condition diagnosed by a doctor with  
9 symptoms persisting or relevant medical treatment continuing over the past six months.  
10  
11

12 Health-related behavioural variables were current smoking status, divided into three  
13 groups: smoking all the time, has ever smoked, and never smoked. Participants were  
14 asked to perform weekly physical exercise during the past six months, such as climbing,  
15 ball games, equipment exercise, swimming, jogging, etc. The frequency of physical  
16 exercise was divided into three groups: never exercised, 1–5 times, and > 6 times.  
17  
18  
19  
20  
21  
22  
23  
24  
25  
26  
27  
28  
29

### 30 **Patient and public involvement**

31 Patients and the public were not involved in the design, conduct, reporting or  
32 dissemination plans of this research.  
33  
34  
35  
36  
37  
38

### 39 **Statistical analysis**

40 Descriptive statistics were used for participants' characteristics and the reported  
41 problems on the five dimensions of the EQ-5D-3L. Continuous variable were described  
42 as mean and standard deviation (SD), whereas categorised variable was described as  
43 frequency and percentages. Student's *t* test or analysis of variance (ANOVA) was used  
44 when variables conformed to an approximately normal distribution; otherwise, the  
45 Mann-Whitney *U* test or Kruskal-Wallis H test was used. Categorical variables were  
46 compared between the groups using the chi-square test.  
47  
48  
49  
50  
51  
52  
53  
54  
55  
56  
57  
58  
59  
60

1  
2  
3  
4 The importance of changes in the HSU scores was estimated using effect sizes (ES),  
5  
6 which were calculated as the difference between the highest and the lowest HSU scores  
7  
8 among the two surveys divided by the pooled standard deviation. The Effect sizes was  
9  
10 defined  $\leq 0.5$ , 0.5 to 0.8 and  $\geq 0.8$  were small, moderate and large[31]. In this study,  
11  
12 the moderate effect size (0.5) was considered as a threshold for minimal importance of  
13  
14 changes in the HSU scores. As the HSU score was left-skewed with a large proportion  
15  
16 of respondents in full health, the Tobit regression model was used to assess the  
17  
18 influencing factors associated with EQ-5D-3L HSU scores. Data were entered into  
19  
20 Epidata3.1 and analysed using SPSS 24.0, and STATA 15.0. A two-tailed  $p < 0.05$  was  
21  
22 considered statistically significant.  
23  
24  
25  
26  
27  
28  
29

## 30 **Results**

### 31 **Participant characteristics**

32  
33 The characteristics of the participants are listed in Table 1. In 2013, more than half of  
34  
35 the participants were in the 15–44 years age group (56.2%), and older participants  
36  
37 accounted for < 15% of the participants (11.0%) and less than half of the participants  
38  
39 were male (46.5%). Moreover, 57% of participants had never received education and  
40  
41 14.98% of the participants were unemployed. More than four out of five participants  
42  
43 resided in rural areas (84.9%) with an average altitude of  $3838 \pm 526$  m. Overall, 11.35%  
44  
45 of participants reported having a disease during 2 weeks before data collection, while,  
46  
47 more than half of participants (65.6%) had no chronic diseases during the past 6 months.  
48  
49  
50  
51  
52  
53  
54  
55

56  
57 In 2018, the sociodemographic characteristics of the participants were basically the  
58  
59 same as those in 2013. The average age was  $45.22 \pm 14.71$  years, and more than half of  
60

1  
2  
3  
4 the participants were female (56.6%). Of the participants, 52.0% never had education,  
5  
6 81.2% were employed, 78.3% were married, and 77.5% lived in rural areas with an  
7  
8 average altitude of  $3903 \pm 495$  m. Most of the participants (85.1%) were non-smokers,  
9  
10 and 62.3% had never engaged in weekly physical exercise during the past 6 months.  
11  
12 Compared two waves of surveys, participants in the 2018 were more female ( $P<0.001$ ),  
13  
14 reported a higher level of education ( $P<0.001$ ), had a lower employed proportion  
15  
16 ( $P=0.008$ ), more lived in urban with more high altitude ( $P<0.001$ ).  
17  
18  
19  
20  
21  
22

### 23 **Participant's HRQoL and its changes**

24  
25  
26 The HSU scores stratified by characteristics of participants in two surveys were listed  
27  
28 in Table 2. The mean HSU scores of the participants were  $0.969 \pm 0.078$  in 2013 and  
29  
30  $0.966 \pm 0.077$  in 2018, which showed a significantly decreasing trend ( $P<0.001$ ,  
31  
32  $ES=0.136$ ). Figure 1 presents the distribution of participant's HSU scores in two  
33  
34 surveys. It revealed a left-skewed distribution with skewness of -4.189 in 2013 and -  
35  
36 4.642 in 2018, ranging from 0.170 to 1.000. The states of 11111 (no problems in any  
37  
38 dimension) were reported in 74% and 70% of the participants in 2013 and 2018,  
39  
40 respectively. The trend in HSU scores was observed decreased in most subgroups.  
41  
42  
43  
44  
45  
46  
47

48 The highest proportion of reporting health problems was the pain/discomfort  
49  
50 dimension (2013:18.1%, 2018: 17.9%). Problems with self-care dimension was least  
51  
52 prevalent, 7.7% and 8.5% participants reported in 2013 and 2018, respectively. As  
53  
54 compared to the 2013, reported problems increased in mobility (by 1.2%), self-care (by  
55  
56 0.8%), usual activities (by 0.6%), and anxiety/depression (by 3.8%) in 2018. While,  
57  
58  
59  
60

1  
2  
3  
4 reported problems in pain/discomfort decreased by 0.2% (Table 3).  
5  
6

### 7 **HRQoL of participants at different altitudes**

8  
9

10 Two survey's findings showed that participants lived in the 3500-4000m group had the  
11 highest HSU scores. Similar to the general trend, health state scores in 2018 were  
12 slightly lower than those in 2013 at different altitude groups (Table 2). Figure 2  
13 describes the percentage of participants with self-reported health problems by different  
14 altitude groups. The distribution trend was generally consistent in two surveys.  
15  
16 Participants lived in 3500–4000m had the least reported problems in all five dimensions,  
17 while participants lived in 1500–3500m and 4000–5000m reported more problems in  
18 pain/discomfort, anxiety/depression and mobility dimensions.  
19  
20  
21  
22  
23  
24  
25  
26  
27  
28  
29  
30

### 31 **Factors associated with HSU scores**

32  
33  
34

35 The Tobit regression analyses of the factors associated with HSU scores were presented  
36 in Table 4. The result confirmed the decreased trend in HSU scores over time ( $\beta = -$   
37  $0.014$ ,  $P < 0.001$ ), after adjustment for variations in the other independent variables.  
38  
39 However, the effect sizes of this change did not reach the threshold of minimal clinical  
40 importance ( $ES = 0.04$ ). The elderly, the unemployed, the separated/divorced/widowed,  
41  
42 and the healthy participants were significant predictors of the HSU score, with generally  
43 larger values of ES and reached the threshold of minimal clinical importance.  
44  
45  
46  
47  
48  
49  
50  
51  
52  
53

### 54 **Discussion**

55  
56

57 To the best of our knowledge, this is the first study to evaluate the HRQoL of Tibetan  
58 population and its changes over time, based on a representative sample from the NHSS  
59  
60

1  
2  
3  
4 of Tibet in China. The HRQoL of Tibetan was lower than general Chinese population,  
5  
6 and decreased over time in five years (2013–2018). Moreover, we found Tibetans living  
7  
8 at 3500–4000m altitude had the best HRQoL. Our study also identified factors  
9  
10 influencing HRQoL including females, elders, unemployed, and more chronic diseases  
11  
12 with a negative impact. While, higher education levels, no disease during the past two  
13  
14 weeks, and frequent weekly physical exercise had a positive impact on HRQoL of the  
15  
16 Tibetan population.  
17  
18  
19  
20  
21

22 The mean HSU scores of the Tibetan population were 0.969 (SD = 0.078) in 2013  
23  
24 and 0.966 (SD = 0.077) in 2018, higher than that reported in Heilongjiang, Hunan, and  
25  
26 Shanxi in China[16, 17, 19]. This may be due to the use of two different 3L value sets  
27  
28 used to calculate the HSU score. Compared to the 3L<sub>2018</sub> algorithm, the 3L<sub>2014</sub> algorithm  
29  
30 includes a constant term and N3, resulting in a utility value gap between full health and  
31  
32 the second-best health state, reducing the values of other health states[32]. Therefore,  
33  
34 the 3L<sub>2018</sub> index score was systematically higher than the 3L<sub>2014</sub> index score at absolute  
35  
36 levels[26]. The result also indicated that HSU scores of two waves of surveys were  
37  
38 significantly lower than the that of the general Chinese population, confirming regional  
39  
40 and residential disparities in HRQoL of the Chinese populations[33]. The eastern–  
41  
42 middle–western disparities in development have existed historically. Although in recent  
43  
44 years China’s development strategy has focused more on western areas including  
45  
46 implementing poverty alleviation policies, promoting the construction of infrastructure,  
47  
48 low taxation, and national level fiscal transfer to the middle and western areas, a huge  
49  
50 gap still exists between regions[27] with lower HRQoL in residents of western regions  
51  
52  
53  
54  
55  
56  
57  
58  
59  
60

1  
2  
3  
4 than that of those in the eastern region.  
5

6  
7 Based on the HRQoL changes between the two waves of surveys, HSU scores in  
8  
9 2018 were slightly lower than those in 2013, and statistical differences existed in the  
10  
11 total population and at different demographic characteristics levels. However, the  
12  
13 changes between 2013 and 2018 were minimal and failed to reach the threshold  
14  
15 minimal clinically important difference of  $\sim 0.074$  based on EQ-5D-3L[34]. This is  
16  
17 consistent with previous studies on the changes in HRQoL in the Chinese population[20,  
18  
19 21]. This could be due to proportion of extreme problems reported by EQ-5D-3L, with  
20  
21 0.42 to 0.45% reporting extreme problems in anxiety/depression and pain/discomfort  
22  
23 compared to 2013. According to the 3L<sub>2014</sub> algorithm, the value in level-3 (L3)  
24  
25 parameters is larger than level-2 (L2) or level-1 (L1) with increasing health state  
26  
27 severity. Hence, for a health transition involving both improvement and deterioration,  
28  
29 the magnitude of health gain from improvement in a certain dimension may be offset  
30  
31 to a large extent by deterioration in another dimension[26]. Another possible reason  
32  
33 may be related to the changing demographic and socioeconomic status in China.  
34  
35 Between 2013 and 2018, the government implemented a series of policies, especially  
36  
37 the targeting poverty alleviation strategy, driving continuous rapid growth of residents'  
38  
39 income and further improving the consumption level and length of life. Life expectancy  
40  
41 increased from 76.3–77.0 years during this time[35]. However, the aging of the  
42  
43 population, unhealthy lifestyles, and environmental exposure have led to the rising  
44  
45 prevalence of chronic diseases and functional limitations, related to lower HRQoL  
46  
47 among the Tibetan population.  
48  
49  
50  
51  
52  
53  
54  
55  
56  
57  
58  
59  
60

1  
2  
3  
4 Pain/discomfort was the most frequently reported problem in this study similar to  
5  
6 previous studies in China, however, the absolute proportion of each dimension reported  
7  
8 was higher than the general population trends based on the NHSS data[33] and other  
9  
10 provincial studies in China[16, 18, 19]. This may be due to the plateau disease[36].  
11  
12 Residents living on the plateau for a long time evolve a unique physiological  
13  
14 mechanism to adapt to the environment. However, some residents gradually lose their  
15  
16 adaptability and suffer from various acute or chronic diseases related to the plateau  
17  
18 environment under the stimulation of continuous hypoxia and low pressure[37]. The  
19  
20 two-week illness prevalence rate of residents aged  $\geq 15$  years in Tibet was 20.1% in  
21  
22 2018, and hypertension has been reported as the most common chronic disease[38]. A  
23  
24 previous study reported that the prevalence of hypertension in Tibet is higher than the  
25  
26 Chinese national level and is the highest among all provinces, as well as higher than  
27  
28 other residents living at high altitudes[39, 40]. As altitude increases, progressive  
29  
30 reductions in barometric pressure, air temperature, and air humidity are observed.  
31  
32 Headache, shortness of breath, chest tightness, anorexia, dizziness, limb fatigue, and  
33  
34 sleep disturbances were common symptoms of Tibetan[38].

35  
36  
37  
38  
39  
40  
41  
42  
43  
44  
45 Compared with other high-altitudes, we found that Tibetans living at 3500–4000  
46  
47 m had the best HRQoL. This could be attributed to many reasons. First, most Tibetan  
48  
49 tend to stay at their altitude of residence for extended periods of time, the complex  
50  
51 interaction between genetic and environmental influence led to the extraordinary ability  
52  
53 to adapt to their hypoxic environment, and less susceptible to chronic mountain  
54  
55 sickness[41]. Second, TAR is a vast territory with a sparse population with high-altitude  
56  
57  
58  
59  
60



1  
2  
3  
4 in the northwest and low in the southeast. The region can be divided into three regions  
5  
6 based on altitude. The Qiangtang Plateau in the north ( $> 5000$  m), and the central basin  
7  
8 region and Himalayan mountains (4000–5000 m on average). The valleys of the middle  
9  
10 and lower reaches of the Yarlung Zangbo River and the three rivers in eastern Tibet  
11  
12 have an altitude of 3000–4000 m, and 60% of the population is concentrated there. Of  
13  
14 the seven cities surveyed, Lhasa, Shannan, Qamdo, and Shigaze have an average  
15  
16 altitude of 3500–4000 m with their GDP ranking among the top four in Tibet according  
17  
18 to the Seventh National Census in 2020. Similar results have been reported previously  
19  
20 with socioeconomic status significantly associated with higher HRQoL[20].  
21  
22 Socioeconomic status is detrimental to health as it affects people's living and working  
23  
24 conditions and restricts accessibility to medical care[42]. Moreover, socioeconomic  
25  
26 status affects people's psychological state and cognition of the world around them[43].  
27  
28 During the few last decades, China has implemented strong policies to facilitate  
29  
30 economic development in the Qinghai-Tibet plateau (e.g., the Strategy of the  
31  
32 Development of China's West). The implementation of supportive strategies should  
33  
34 help improve socioeconomic status in the future, including improving public  
35  
36 infrastructure, medical service capacity, and disease prevention improving HRQoL.  
37  
38  
39  
40  
41  
42  
43  
44  
45  
46  
47

48 Those living in low-altitude areas (1500–3500m) reported the most problems in  
49  
50 anxiety/depression consistent with previous studies. A large sample survey of the  
51  
52 prevalence of depression among Tibetans of the Qinghai-Tibet Plateau was 28.6%,  
53  
54 higher than that in the general Chinese population and higher than that reported in a  
55  
56 western study with high-altitude samples[44]. The prevalence of depression is  
57  
58  
59  
60

1  
2  
3  
4 significantly correlated with climatic pressure, particularly altitude[45]. Generally, the  
5  
6 combined effects of harsh natural environment on the plateau, high-altitude hypoxia,  
7  
8 low atmospheric pressure, intense ultraviolet radiation, relatively weak community  
9  
10 support caused by low population density, and lack of access to mental health resources  
11  
12 increases the severity of depression among those living in high-altitude areas[46-48].  
13  
14 In this study, the area with an altitude of 1500–3500 m was located southeast of the  
15  
16 TAR. Nyingchi City, with an average altitude of 3100 m, has the lowest altitude and  
17  
18 wettest climate in TAR. With convenient transportation and multiple splendid sceneries,  
19  
20 tourism is the main source of income in this area, attracting millions of people traveling  
21  
22 for sightseeing, mountaineering, and trekking every year[49]. Previous studies have  
23  
24 reported a significant association between tourism impact and residents' quality of  
25  
26 life[50, 51]. Tourism provides employment opportunities and tax revenues, supports  
27  
28 economic diversity, and services and products enjoyed by residents[52, 53]. However,  
29  
30 negative impacts of tourisms on residents' HRQoL have been reported including  
31  
32 crowding, traffic and parking issues, criminality, and cost of living, changes in hosts'  
33  
34 way of life, and friction between tourists and residents[54]. The perceived negative  
35  
36 impacts, negative emotions, pressure, and relative deprivation of the residents will  
37  
38 affect their subjective well-being, leading to psychological problems including anxiety  
39  
40 and depression.  
41  
42  
43  
44  
45  
46  
47  
48  
49  
50  
51

52  
53 This study had several limitations. First, this study did not recruit the same pool of  
54  
55 participants in two waves of surveys, making it difficult to identify causal associations.  
56  
57  
58 However, the same cities were selected, and the participants may partly overlap. Second,  
59  
60

1  
2  
3  
4 the participants recruited in the surveys were those had lived in Tibet for more than six  
5  
6 months; however, we could not determine if they were born in Tibet or came to work  
7  
8  
9 from other low-altitude areas. A small-scale survey could be conducted to refine the  
10  
11 participant inclusion criteria to validate the study findings in the future. Third, many  
12  
13 studies have reported that EQ-5D-3L has more significant ceiling effects than EQ-5D-  
14  
15 5L. However, EQ-5D-3L is more suitable for use in large-scale population surveys  
16  
17 because of its small cognitive burden. Moreover, the comparison of the two waves of  
18  
19 surveys indicated the overall changing trends in HRQoL of participants were able to be  
20  
21 derived from EQ-5D-3L.  
22  
23  
24  
25  
26  
27

## 28 **Conclusion**

29  
30  
31 This study revealed the HRQoL of Tibetan population was lower than general Chinese  
32  
33 population, and decreased over time between 5 years. There were differences in  
34  
35 HRQoL among Tibetan at different altitudes, with residents living at 3500-4000m  
36  
37 having the best quality of life. More attention should be paid to those Tibetans who are  
38  
39 older, female, unemployed and without formal education. Targeted policies and  
40  
41 strategies need to be strengthened, including plateau subsidies, poverty alleviation,  
42  
43 primary health service capacity, standardized management of chronic diseases, and  
44  
45 health education.  
46  
47  
48  
49  
50  
51

## 52 **Acknowledgements**

53  
54  
55 We gratefully acknowledge the contribution of the investigators from Preventive  
56  
57 Medicine at Medical College of Tibet University, and we also thank all the participants  
58  
59  
60

1  
2  
3  
4 who participated in the study.  
5  
6

## 7 **Funding statement**

8  
9  
10 This work was supported by the Sixth National Health Service Survey Project in Tibet  
11  
12 (grant number 18080027); and China Medical Board (grant number 11-086).  
13  
14  
15

## 16 **Competing interest statement**

17  
18  
19 All authors declare no competing interests.  
20  
21

## 22 **Author Contributions**

23  
24  
25  
26 SPL and ZXDW have substantial contributions to conception and design, acquisition  
27  
28 of funding, data and interpretation of data. CDZG and ZXCM were involved in the  
29  
30 acquisition of data. LD, ZS and CFL were responsible for the data analysis and  
31  
32 interpretation of data. LD drafted the manuscript, ZS, CDZG, ZXCM and CFL revised  
33  
34 it critically for important intellectual content, LD and SPL was responsible for the  
35  
36 decision to submit the manuscript, and all authors contributed to final approval of the  
37  
38 manuscript.  
39  
40  
41  
42  
43  
44

## 45 **Ethics statements**

## 46 47 **Patient consent for publication**

48  
49  
50  
51 Not applicable.  
52  
53

## 54 **Ethics approval**

55  
56  
57 This study involves human participants and was approved. This study was conducted  
58  
59  
60

1  
2  
3  
4 with the approval of the National Health Commission of the People's Republic of China  
5  
6 and the Health Commission of Tibet autonomous region.  
7  
8

### 9 **Data availability statement**

10  
11  
12  
13 Data are available upon reasonable request. We have included all the data produced in  
14  
15 the present work in the manuscript. Note that the raw data used in the study were  
16  
17 obtained from National Health Service Surveys of China. We are unable to attach all  
18  
19 the raw data for each participant in this paper due to the ethical restrictions.  
20  
21  
22  
23  
24  
25  
26  
27  
28  
29  
30  
31  
32  
33  
34  
35  
36  
37  
38  
39  
40  
41  
42  
43  
44  
45  
46  
47  
48  
49  
50  
51  
52  
53  
54  
55  
56  
57  
58  
59  
60

## References

1. Calvert M, Blazeby J, Altman DG, et al. Reporting of Patient-Reported Outcomes in Randomized Trials. *JAMA* 2013; 309:814
2. Karimi M, Brazier J. Health, Health-Related Quality of Life, and Quality of Life: What is the Difference? *Pharmacoeconomics* 2016; 34:645-9
3. Macran S, Weatherly H, Kind P. Measuring population health: a comparison of three generic health status measures. *Med Care* 2003; 41:218-31
4. Goodwin E, Green C. A Systematic Review of the Literature on the Development of Condition-Specific Preference-Based Measures of Health. *Appl Health Econ Health Policy* 2016; 14:161-83
5. Devlin NJ, Brooks R. EQ-5D and the EuroQol Group: Past, Present and Future. *Appl Health Econ Health Policy* 2017; 15:127-37
6. Mingji C, Onakpoya IJ, Perera R, Ward AM, Heneghan CJ. Relationship between altitude and the prevalence of hypertension in Tibet: a systematic review. *Heart* 2015; 101:1054-60
7. Tibet Autonomous Region Statistics Bureau. Communiqué on Main Data of the Seventh National Population Census of Tibet Autonomous Region., 2021
8. Zheng Z. Research on the village public service system innovation of agricultural and pastoral areas in tibet--from the perspective of integrated anti-poverty development. *Ethnology Journal* 2012:34-43
9. Beall, Cm. An ecology of high-altitude infancy. *AMER J PHYS ANTHROPOL* 2006
10. Mallet RT, Burtscher J, Richalet JP, Millet GP, Burtscher M. Impact of High Altitude on Cardiovascular Health: Current Perspectives. *Vasc Health Risk Manag* 2021; 17:317-35
11. Kious BM, Bakian A, Zhao J, et al. Altitude and risk of depression and anxiety: findings from the intern health study. *Int Rev Psychiatry* 2019; 31:637-45
12. Wang F, Liu S, Zhang Q, et al. Prevalence of Depression in Older Nursing Home Residents in High and Low Altitude Regions: A Comparative Study. *Front Psychiatry* 2021; 12:669234
13. Song C, Chongsuvivatwong V, Wangdui S, et al. Coverage and effectiveness of hypertension screening in different altitudes of Tibet autonomous region. *BMC Public Health* 2021; 21:33
14. Graham C, Zhou S, Zhang J. Happiness and Health in China: The Paradox of Progress. *World Dev* 2017:S305750X-S15308056X
15. Huang L, Wang Z, Wang H, et al. Nutrition transition and related health challenges over decades in China. *Eur J Clin Nutr* 2021; 75:247-52
16. Huang W, Yu H, Liu C, et al. Assessing Health-Related Quality of Life of Chinese Adults in Heilongjiang Using EQ-5D-3L. *Int J Environ Res Public Health* 2017; 14
17. Si L, Shi L, Chen M, Palmer AJ. Establishing benchmark EQ-5D-3L population health state utilities and identifying their correlates in Gansu Province, China. *Qual Life Res* 2017; 26:3049-58
18. Tan Z, Liang Y, Liu S, et al. Health-related quality of life as measured with EQ-5D among populations with and without specific chronic conditions: a population-based survey in Shaanxi Province, China. *PLoS One* 2013; 8:e65958
19. Deng X, Dong P, Zhang L, et al. Health-related quality of life in residents aged 18 years and older with and without disease: findings from the First Provincial Health Services Survey of Hunan, China. *BMJ Open* 2017; 7:e15880
20. Yao Q, Liu C, Zhang Y, Xu L. Changes in health-related quality of life of Chinese populations measured by the EQ-5D-3 L: a comparison of the 2008 and 2013 National Health Services Surveys. *Health Qual Life Outcomes* 2019; 17:43

21. Wang D, Xie S, Wu J, Sun B. The trend in quality of life of Chinese population: analysis based on population health surveys from 2008 to 2020. *BMC Public Health* 2023; 23:167
22. Brooks R. EuroQol: the current state of play. *Health Policy* 1996; 37:53-72
23. Liu GG, Wu H, Li M, Gao C, Luo N. Chinese time trade-off values for EQ-5D health states. *Value Health* 2014; 17:597-604
24. Zhuo L, Xu L, Ye J, et al. Time Trade-Off Value Set for EQ-5D-3L Based on a Nationally Representative Chinese Population Survey. *Value Health* 2018; 21:1330-7
25. Liu GG, Guan H, Jin X, Zhang H, Vortherms SA, Wu H. Rural population's preferences matter: a value set for the EQ-5D-3L health states for China's rural population. *Health Qual Life Outcomes* 2022; 20:14
26. Zhang RY, Wang W, Zhou HJ, Xuan JW, Luo N, Wang P. A head-to-head comparison of the EQ-5D-3L index scores derived from the two EQ-5D-3L value sets for China. *Health Qual Life Outcomes* 2022; 20:80
27. Sun S, Chen J, Johannesson M, et al. Regional differences in health status in China: population health-related quality of life results from the National Health Services Survey 2008. *Health Place* 2011; 17:671-80
28. Woolcott OO, Ader M, Bergman RN. Glucose homeostasis during short-term and prolonged exposure to high altitudes. *Endocr Rev* 2015; 36:149-73
29. Tibet Autonomous Region Tourism Development Office. Tibet's first geographic census., 2017
30. The Ministry of Labor and Personnel and the Ministry of Finance. The Ministry of Labor and Personnel and the Ministry of Finance responded to the People's Government of Tibet Autonomous Region on issues concerning the implementation of temporary subsidies for workers in plateau areas., 1984
31. Cohen J. A power primer. *Psychol Bull* 1992; 112:155-9
32. Pan CW, Zhang RY, Luo N, et al. How the EQ-5D utilities are derived matters in Chinese diabetes patients: a comparison based on different EQ-5D scoring functions for China. *Qual Life Res* 2020; 29:3087-94
33. Yao Q, Liu C, Zhang Y, Xu L. Population norms for the EQ-5D-3L in China derived from the 2013 National Health Services Survey. *J Glob Health* 2021; 11:8001
34. Walters SJ, Brazier JE. Comparison of the minimally important difference for two health state utility measures: EQ-5D and SF-6D. *Qual Life Res* 2005; 14:1523-32
35. National Health Commission. 2021 China Health Statistics Yearbook. Beijing: China Union Medical University Press, 2022
36. Netzer N, Strohl K, Faulhaber M, Gatterer H, Burtscher M. Hypoxia-related altitude illnesses. *J Travel Med* 2013; 20:247-55
37. Crawford JE, Amaru R, Song J, et al. Natural Selection on Genes Related to Cardiovascular Health in High-Altitude Adapted Andeans. *Am J Hum Genet* 2017; 101:752-67
38. Deng R, Labasangzhu, Zhaxideji, et al. Illness prevalence rate in Tibet, China: data from the 2018 National Health Service Survey. *BMC Public Health* 2020; 20:955
39. Li K, Liang Y, Sun Y, et al. The relationship between polymorphisms at 17 gene sites and hypertension among the Aboriginal Tibetan people. *Biomed Environ Sci* 2012; 25:526-32
40. Wang J, Zhang L, Wang F, Liu L, Wang H. Prevalence, awareness, treatment, and control of hypertension in China: results from a national survey. *Am J Hypertens* 2014; 27:1355-61
41. Wu T. The Qinghai-Tibetan plateau: how high do Tibetans live? *High Alt Med Biol* 2001; 2:489-99

- 1  
2  
3  
4  
5  
6  
7  
8  
9  
10  
11  
12  
13  
14  
15  
16  
17  
18  
19  
20  
21  
22  
23  
24  
25  
26  
27  
28  
29  
30  
31  
32  
33  
34  
35  
36  
37  
38  
39  
40  
41  
42  
43  
44  
45  
46  
47  
48  
49  
50  
51  
52  
53  
54  
55  
56  
57  
58  
59  
60
42. Jiang Y, Hesser JE. Associations between health-related quality of life and demographics and health risks. Results from Rhode Island's 2002 behavioral risk factor survey. *Health Qual Life Outcomes* 2006; 4:14
43. Matthews KA, Gallo LC. Psychological perspectives on pathways linking socioeconomic status and physical health. *Annu Rev Psychol* 2011; 62:501-30
44. Golicki D, Niewada M, Jakubczyk M, Wrona W, Hermanowski T. Self-assessed health status in Poland: EQ-5D findings from the Polish valuation study. *Pol Arch Med Wewn* 2010; 120:276-81
45. Gamboa JL, Caceda R, Arregui A. Is depression the link between suicide and high altitude? *High Alt Med Biol* 2011; 12:403-4, 405
46. Wang J, Zhou Y, Liang Y, Liu Z. A Large Sample Survey of Tibetan People on the Qinghai-Tibet Plateau: Current Situation of Depression and Risk Factors. *Int J Environ Res Public Health* 2019; 17
47. Ding Y, Shi B, Su G, et al. Assessing Suitability of Human Settlements in High-Altitude Area Using a Comprehensive Index Method: A Case Study of Tibet, China. *Sustainability* 2021; 13
48. Li XY, Wu XY, Fu C, Shen XF, Wu YH, Wang T. Effects of acute mild and moderate hypoxia on human mood state. *Space Med Med Eng (Beijing)* 2000; 13:1-5
49. Chen Y, Zhang G, Chen Z, et al. A warming climate may reduce health risks of hypoxia on the Qinghai-Tibet Plateau. *Sci Bull (Beijing)* 2022; 67:341-4
50. Kim, Hyelin, Uysal, Muzaffer, Woo, Eunju. Life satisfaction and support for tourism development. *Annals of tourism research: A social sciences journal* 2015; 50:84-97
51. Vargas-Sanchez A, Plaza-Mejia MDLA, Porrás-Bueno N. Understanding Residents' Attitudes toward the Development of Industrial Tourism in a Former Mining Community. *J Travel Res* 2009; 47:373-87
52. Aref F. The Effects of Tourism on Quality of Life: A Case Study of Shiraz, Iran. *Life ence Journal* 2011; 8:26-30
53. Andereck, Kathleen L, Nyaupane, Gyan P. Exploring the Nature of Tourism and Quality of Life Perceptions among Residents. *J Travel Res* 2011; 11:25-34
54. Andereck KL, Valentine KM, Knopf RC, Vogt CA. Residents' perceptions of community tourism impacts. *Ann Tour Res* 2005; 32:1056-76



**Table 1 Characteristics of the participants**

| Characteristics                         | 2013 (N=10247) |      | 2018 (N=6436) |      | Total (N=16683) |      | P-value |
|-----------------------------------------|----------------|------|---------------|------|-----------------|------|---------|
|                                         | N              | %    | N             | %    | N               | %    |         |
| <b>Age groups</b>                       |                |      |               |      |                 |      | <0.001  |
| 15-44 years                             | 5754           | 56.2 | 3159          | 49.1 | 8913            | 53.4 |         |
| 45-64 years                             | 3363           | 32.8 | 2568          | 39.9 | 5931            | 35.6 |         |
| ≥65 years                               | 1130           | 11.0 | 709           | 11.0 | 1839            | 11.0 |         |
| <b>Gender</b>                           |                |      |               |      |                 |      | <0.001  |
| Male                                    | 4766           | 46.5 | 2792          | 43.4 | 7558            | 45.3 |         |
| Female                                  | 5481           | 53.5 | 3644          | 56.6 | 9125            | 54.7 |         |
| <b>Educational attainment</b>           |                |      |               |      |                 |      | <0.001  |
| Illiterate                              | 5841           | 57.0 | 3348          | 52.0 | 9189            | 55.1 |         |
| Primary school                          | 3080           | 30.1 | 2143          | 33.3 | 5223            | 31.3 |         |
| Junior high school and above            | 1326           | 12.9 | 945           | 14.7 | 2271            | 13.6 |         |
| <b>Employment</b>                       |                |      |               |      |                 |      | 0.008   |
| Employed                                | 8514           | 83.1 | 5228          | 81.3 | 13742           | 82.4 |         |
| Retired                                 | 198            | 1.9  | 131           | 2.0  | 329             | 2.0  |         |
| Unemployed                              | 1535           | 15.0 | 1077          | 16.7 | 2612            | 15.7 |         |
| <b>Marital status</b>                   |                |      |               |      |                 |      | <0.001  |
| Single                                  | 1563           | 15.3 | 748           | 11.6 | 2311            | 13.9 |         |
| Married                                 | 7718           | 75.3 | 5037          | 78.3 | 12755           | 76.5 |         |
| Separated/divorced/widowed              | 966            | 9.4  | 651           | 10.1 | 1617            | 9.7  |         |
| <b>Location</b>                         |                |      |               |      |                 |      | <0.001  |
| Rural                                   | 8699           | 84.9 | 4988          | 77.5 | 13687           | 82.0 |         |
| Urban                                   | 1548           | 15.1 | 1448          | 22.5 | 2996            | 18.0 |         |
| <b>Altitude, m (Mean±SD)</b>            | 3838±<br>526   | -    | 3903±<br>495  | -    | 3863±51<br>5    | -    |         |
| <b>Altitude groups</b>                  |                |      |               |      |                 |      | <0.001  |
| 1500-3500 m                             | 2219           | 21.7 | 1123          | 17.5 | 3342            | 20.0 |         |
| 3500-4000 m                             | 4816           | 47.0 | 2933          | 45.6 | 7749            | 46.4 |         |
| 4000-5000 m                             | 3212           | 31.3 | 2380          | 36.9 | 5592            | 33.5 |         |
| <b>Diseased during the past 2 weeks</b> |                |      |               |      |                 |      | 0.366   |
| Yes                                     | 1152           | 11.4 | 701           | 10.9 | 1853            | 11.1 |         |
| No                                      | 9002           | 88.6 | 5735          | 89.1 | 14737           | 88.3 |         |
| <b>Number of chronic diseases</b>       |                |      |               |      |                 |      | <0.001  |
| 0                                       | 6726           | 65.6 | 3684          | 57.2 | 10410           | 62.4 |         |
| 1                                       | 2634           | 25.7 | 1743          | 27.1 | 4377            | 26.2 |         |
| ≥2                                      | 887            | 8.7  | 1009          | 15.7 | 1896            | 11.4 |         |
| <b>Smoking</b>                          |                |      |               |      |                 |      | <0.001  |
| Smoker                                  | 1424           | 13.9 | 724           | 11.2 | 2148            | 12.9 |         |
| Ex-smoker                               | 487            | 4.7  | 238           | 3.7  | 725             | 4.3  |         |
| Non-smoker                              | 8336           | 81.4 | 5474          | 85.1 | 13810           | 82.8 |         |

|                                                          |      |      |      |      |       |      |        |
|----------------------------------------------------------|------|------|------|------|-------|------|--------|
| <b>Weekly physical exercise during the past 6 months</b> |      |      |      |      |       |      | <0.001 |
| Never exercised                                          | 9437 | 92.3 | 4054 | 63.0 | 13491 | 80.9 |        |
| 1–5 times                                                | 511  | 5.0  | 1247 | 19.4 | 1758  | 10.5 |        |
| ≥6 times                                                 | 279  | 2.7  | 1135 | 17.6 | 1414  | 8.5  |        |

For peer review only

**Table 2 Health state utility score stratified by characteristics of participants in two surveys**

| Characteristics                                          | 2013<br>(N=10247) | 2018<br>(N=6436) | Effect Size<br>(ES) | P-value |
|----------------------------------------------------------|-------------------|------------------|---------------------|---------|
| <b>Age</b>                                               |                   |                  |                     |         |
| 15-44 years                                              | 0.987(0.049)      | 0.987(0.041)     | 0.000               | 0.003   |
| 45-64 years                                              | 0.962(0.078)      | 0.959(0.076)     | 0.039               | 0.013   |
| ≥65 years                                                | 0.900(0.133)      | 0.899(0.139)     | 0.007               | 0.973   |
| <b>Gender</b>                                            |                   |                  |                     |         |
| Male                                                     | 0.975(0.071)      | 0.973(0.070)     | 0.030               | 0.002   |
| Female                                                   | 0.964(0.083)      | 0.961(0.082)     | 0.036               | <0.001  |
| <b>Employment</b>                                        |                   |                  |                     |         |
| Employed                                                 | 0.977(0.064)      | 0.976(0.058)     | 0.016               | <0.001  |
| Retired                                                  | 0.945(0.116)      | 0.965(0.057)     | 0.205               | 0.493   |
| Unemployed                                               | 0.926(0.117)      | 0.918(0.128)     | 0.066               | 0.011   |
| <b>Educational attainment</b>                            |                   |                  |                     |         |
| Illiterate                                               | 0.959(0.088)      | 0.956(0.088)     | 0.034               | <0.001  |
| Primary school                                           | 0.979(0.064)      | 0.971(0.069)     | 0.121               | <0.001  |
| Junior high school and above                             | 0.990(0.046)      | 0.991(0.038)     | 0.023               | 0.180   |
| <b>Marital status</b>                                    |                   |                  |                     |         |
| Single                                                   | 0.975(0.086)      | 0.979(0.068)     | 0.050               | 0.182   |
| Married                                                  | 0.973(0.069)      | 0.969(0.069)     | 0.058               | <0.001  |
| Separated/divorced/widowed                               | 0.928(0.111)      | 0.925(0.124)     | 0.026               | 0.832   |
| <b>Location</b>                                          |                   |                  |                     |         |
| Rural                                                    | 0.967(0.080)      | 0.966(0.077)     | 0.013               | 0.001   |
| Urban                                                    | 0.980(0.065)      | 0.967(0.080)     | 0.183               | <0.001  |
| <b>Altitude groups</b>                                   |                   |                  |                     |         |
| 1500-3500m                                               | 0.966(0.078)      | 0.961(0.079)     | 0.064               | <0.001  |
| 3500-4000m                                               | 0.975(0.072)      | 0.970(0.073)     | 0.069               | <0.001  |
| 4000-5000m                                               | 0.963(0.084)      | 0.963(0.081)     | 0.000               | 0.411   |
| <b>Diseased during the past 2 weeks</b>                  |                   |                  |                     |         |
| Yes                                                      | 0.933(0.111)      | 0.934(0.100)     | 0.009               | 0.303   |
| No                                                       | 0.974(0.072)      | 0.970(0.073)     | 0.055               | <0.001  |
| <b>Number of chronic diseases</b>                        |                   |                  |                     |         |
| 0                                                        | 0.983(0.057)      | 0.986(0.049)     | 0.055               | 0.331   |
| 1                                                        | 0.950(0.097)      | 0.951(0.091)     | 0.010               | 0.663   |
| ≥2                                                       | 0.920(0.113)      | 0.919(0.106)     | 0.009               | 0.223   |
| <b>Smoking</b>                                           |                   |                  |                     |         |
| Smoker                                                   | 0.985(0.056)      | 0.984(0.048)     | 0.019               | 0.094   |
| Ex-smoker                                                | 0.965(0.073)      | 0.954(0.089)     | 0.138               | 0.146   |
| Non-smoker                                               | 0.967(0.081)      | 0.964(0.080)     | 0.037               | <0.001  |
| <b>Weekly physical exercise during the past 6 months</b> |                   |                  |                     |         |
| Never exercised                                          | 0.969(0.079)      | 0.961(0.086)     | 0.098               | <0.001  |
| 1-5 times                                                | 0.967(0.071)      | 0.973(0.066)     | 0.087               | 0.004   |

|              |              |              |       |        |
|--------------|--------------|--------------|-------|--------|
| ≥6 times     | 0.985(0.044) | 0.977(0.051) | 0.171 | <0.001 |
| <b>Total</b> | 0.969(0.078) | 0.966(0.077) | 0.136 | <0.001 |

For peer review only

**Table 3 health problems reported by participants based on EQ-5D-3L**

| EQ-5D-3L                  | 2013 |      | 2018 |      | $\chi^2$ | P-value |
|---------------------------|------|------|------|------|----------|---------|
|                           | N    | %    | N    | %    |          |         |
| <b>Mobility</b>           |      |      |      |      | 12.794   | 0.002   |
| No problem                | 8956 | 87.4 | 5544 | 86.2 |          |         |
| Moderate problem          | 1221 | 11.9 | 865  | 13.4 |          |         |
| Extreme problem           | 70   | 0.7  | 27   | 0.4  |          |         |
| <b>Self-care</b>          |      |      |      |      | 2.791    | 0.248   |
| No problem                | 9453 | 92.3 | 5891 | 91.5 |          |         |
| Moderate problem          | 733  | 7.1  | 502  | 7.8  |          |         |
| Extreme problem           | 61   | 0.6  | 43   | 0.7  |          |         |
| <b>Usual activities</b>   |      |      |      |      | 1.407    | 0.495   |
| No problem                | 9014 | 88.0 | 5624 | 87.4 |          |         |
| Moderate problem          | 1077 | 10.5 | 714  | 11.1 |          |         |
| Extreme problem           | 156  | 1.5  | 98   | 1.5  |          |         |
| <b>Pain/discomfort</b>    |      |      |      |      | 7.543    | 0.023   |
| No problem                | 8393 | 81.9 | 5283 | 82.1 |          |         |
| Moderate problem          | 1750 | 17.1 | 1059 | 16.4 |          |         |
| Extreme problem           | 104  | 1.0  | 94   | 1.5  |          |         |
| <b>Anxiety/depression</b> |      |      |      |      | 52.078   | <0.001  |
| No problem                | 9111 | 88.9 | 5479 | 85.1 |          |         |
| Moderate problem          | 1047 | 10.2 | 874  | 13.6 |          |         |
| Extreme problem           | 89   | 0.9  | 83   | 1.3  |          |         |

Table 4 Tobit regression analysis on the EQ-5D-3L HSU scores

| Independent variable                                | $\beta$ | SE    | P-value | 95%CI          | Effect Size |
|-----------------------------------------------------|---------|-------|---------|----------------|-------------|
| <b>Age years (ref.:15-44 years)</b>                 |         |       |         |                |             |
| 45-64 years                                         | -0.071  | 0.004 | <0.001  | -0.079, -0.063 | 0.43        |
| ≥65 years                                           | -0.142  | 0.006 | <0.001  | -0.153, -0.130 | 1.26        |
| <b>Gender (ref.: male)</b>                          |         |       |         |                |             |
| Female                                              | -0.025  | 0.004 | <0.001  | -0.033, -0.017 | 0.14        |
| <b>Educational attainment (ref.: illiterate)</b>    |         |       |         |                |             |
| Primary school                                      | 0.016   | 0.004 | <0.001  | 0.009,0.024    | -0.22       |
| Junior high school and above                        | 0.055   | 0.007 | <0.001  | 0.041, 0.069   | -0.40       |
| <b>Employment (ref.: employed)</b>                  |         |       |         |                |             |
| Retired                                             | -0.036  | 0.012 | 0.003   | -0.060, -0.012 | 0.38        |
| Unemployed                                          | -0.073  | 0.005 | <0.001  | -0.082, -0.064 | 0.72        |
| <b>Marital status (ref.: single)</b>                |         |       |         |                |             |
| Married                                             | 0.018   | 0.006 | 0.002   | 0.007,0.029    | 0.07        |
| Separated/divorced/widowed                          | -0.007  | 0.008 | 0.335   | -0.022 0.008   | 0.52        |
| <b>Location (ref.: rural)</b>                       |         |       |         |                |             |
| Urban                                               | 0.039   | 0.005 | <0.001  | 0.029, 0.049   | 0.00        |
| <b>Altitude groups (ref.: 1500-3500m)</b>           |         |       |         |                |             |
| 3500-4000m                                          | 0.028   | 0.005 | <0.001  | 0.019, 0.037   | -0.11       |
| 4000-5000m                                          | 0.011   | 0.004 | 0.017   | 0.002, 0.021   | 0.03        |
| <b>Diseased during the past 2 weeks (ref.: Yes)</b> |         |       |         |                |             |
| No                                                  | 0.042   | 0.005 | <0.001  | 0.033, 0.052   | -0.50       |
| <b>Number of chronic diseases (ref.: 0)</b>         |         |       |         |                |             |
| 1                                                   | -0.083  | 0.004 | <0.001  | -0.091, -0.075 | 0.34        |

|                                                         |        |       |        |                |       |
|---------------------------------------------------------|--------|-------|--------|----------------|-------|
| ≥2                                                      | -0.125 | 0.005 | <0.001 | -0.136, -0.115 | 0.13  |
| <b>Smoking (ref.: smoker)</b>                           |        |       |        |                |       |
| Ex-smoker                                               | -0.036 | 0.010 | <0.001 | -0.055, -0.018 | 0.34  |
| Non-smoker                                              | -0.011 | 0.006 | 0.086  | -.0233, 0.002  | 0.13  |
| <b>Weekly physical exercise (ref.: never exercised)</b> |        |       |        |                |       |
| 1–5 times                                               | 0.032  | 0.006 | <0.001 | 0.020, 0.043   | 0.00  |
| ≥6 times                                                | 0.050  | 0.007 | <0.001 | 0.036, 0.064   | -0.13 |
| <b>Year (ref.: 2013)</b>                                |        |       |        |                |       |
| 2018                                                    | -0.014 | 0.004 | <0.001 | -0.022, -0.007 | 0.04  |

1  
2  
3  
4 **Figure legends**  
5

6 Figure 1 Distribution of participant's health state utility scores in 2013 and 2018  
7

8  
9 Figure 2a Proportions of health problems reported by participants at different altitude  
10  
11 in 2013  
12

13  
14 Figure 2b Proportions of health problems reported by participants at different altitude  
15  
16 in 2018  
17  
18  
19  
20  
21  
22  
23  
24  
25  
26  
27  
28  
29  
30  
31  
32  
33  
34  
35  
36  
37  
38  
39  
40  
41  
42  
43  
44  
45  
46  
47  
48  
49  
50  
51  
52  
53  
54  
55  
56  
57  
58  
59  
60

For peer review only



1  
2  
3  
4  
5  
6  
7  
8  
9  
10  
11  
12  
13  
14  
15  
16  
17  
18  
19  
20  
21  
22  
23  
24  
25  
26  
27  
28  
29  
30  
31  
32  
33  
34  
35  
36  
37  
38  
39  
40  
41  
42  
43  
44  
45  
46  
47  
48  
49  
50  
51  
52  
53  
54  
55  
56  
57  
58  
59  
60

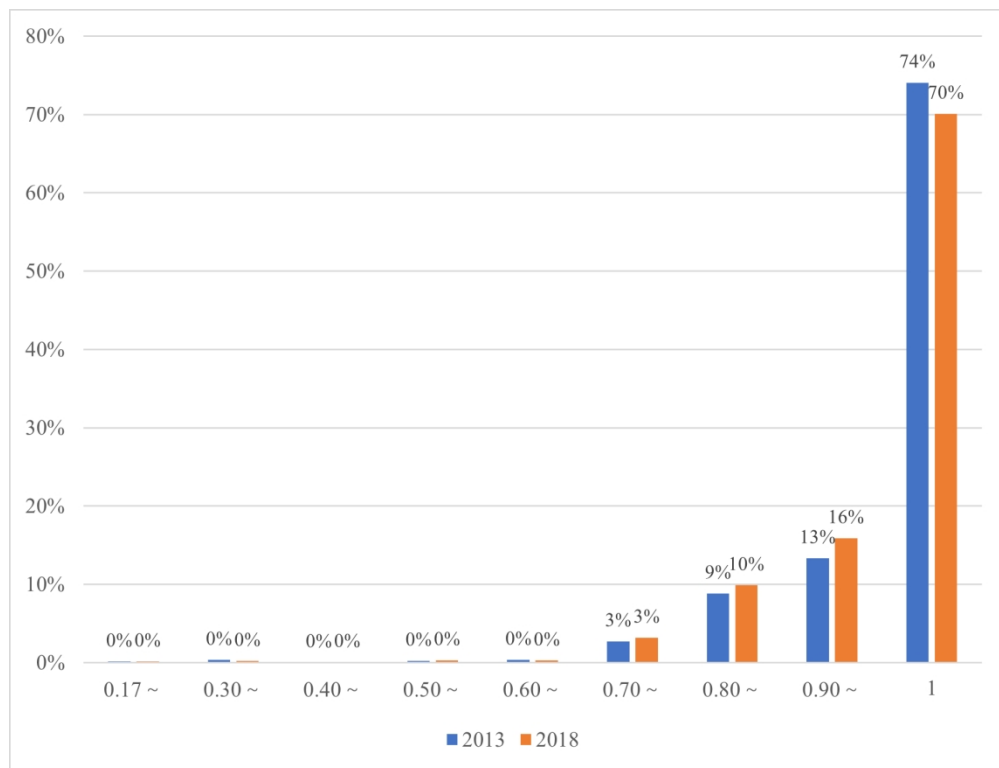

Figure 1 Distribution of participant's health state utility scores in 2013 and 2018

146x111mm (330 x 330 DPI)

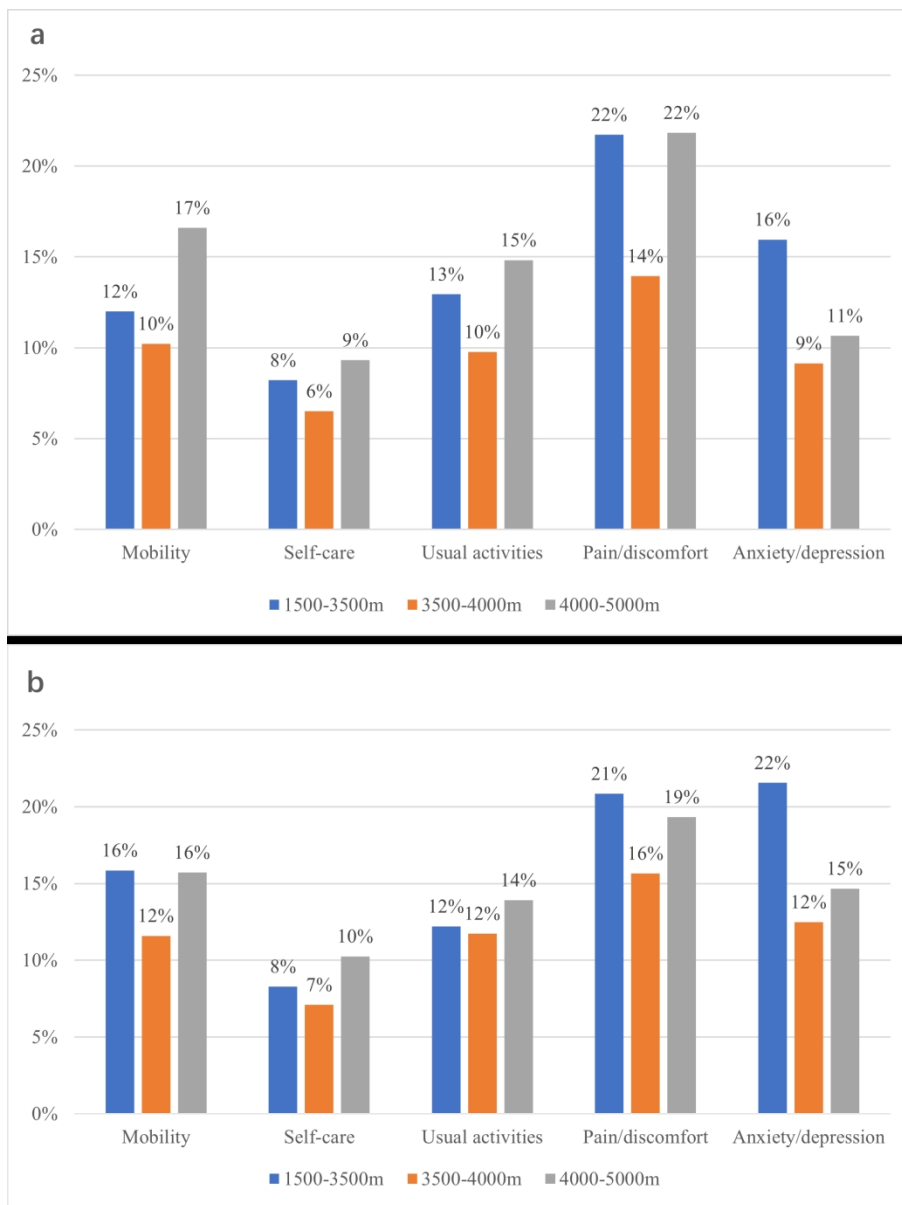

Figure 2a Proportions of health problems reported by participants at different altitude in 2013  
 Figure 2b Proportions of health problems reported by participants at different altitude in 2018

146x193mm (330 x 330 DPI)

**Supplementary Table 1 Tobit regression analysis on the EQ-5D-3L HSU scores in different altitudes using 3L<sub>2022</sub> value set**

| Characteristics                                     | Total  |       |         | <3500m |       |         | 3500-4000m |       |         | >4000m |       |         |
|-----------------------------------------------------|--------|-------|---------|--------|-------|---------|------------|-------|---------|--------|-------|---------|
|                                                     | Coe    | SE    | P-value | Coe    | SE    | P-value | Coe        | SE    | P-value | Coe    | SE    | P-value |
| <b>Age years (ref.:15-44 years)</b>                 |        |       |         |        |       |         |            |       |         |        |       |         |
| 45-64 years                                         | -0.032 | 0.002 | <0.001  | -0.040 | 0.005 | <0.001  | -0.027     | 0.003 | <0.001  | -0.039 | 0.004 | <0.001  |
| ≥65 years                                           | -0.113 | 0.004 | <0.001  | -0.111 | 0.009 | <0.001  | -0.096     | 0.005 | <0.001  | -0.136 | 0.007 | <0.001  |
| <b>Gender (ref.: male)</b>                          |        |       |         |        |       |         |            |       |         |        |       |         |
| Female                                              | -0.011 | 0.002 | <0.001  | -0.012 | 0.005 | 0.017   | -0.006     | 0.003 | 0.071   | -0.021 | 0.004 | <0.001  |
| <b>Educational attainment (ref.: illiterate)</b>    |        |       |         |        |       |         |            |       |         |        |       |         |
| Primary school                                      | 0.011  | 0.002 | <0.001  | 0.002  | 0.005 | 0.687   | 0.012      | 0.003 | <0.001  | 0.007  | 0.004 | 0.115   |
| Junior high school and above                        | 0.014  | 0.003 | <0.001  | 0.022  | 0.007 | 0.003   | 0.010      | 0.004 | 0.025   | 0.012  | 0.007 | 0.083   |
| <b>Employment (ref.: employed)</b>                  |        |       |         |        |       |         |            |       |         |        |       |         |
| Retired                                             | -0.008 | 0.007 | 0.301   | -0.025 | 0.015 | 0.086   | 0.011      | 0.010 | 0.282   | -0.030 | 0.020 | 0.133   |
| Unemployed                                          | -0.060 | 0.003 | <0.001  | -0.094 | 0.008 | <0.001  | -0.049     | 0.004 | <0.001  | -0.072 | 0.005 | <0.001  |
| <b>Marital status (ref.: single)</b>                |        |       |         |        |       |         |            |       |         |        |       |         |
| Married                                             | 0.017  | 0.003 | <0.001  | 0.017  | 0.008 | 0.027   | 0.018      | 0.004 | <0.001  | 0.016  | 0.006 | 0.005   |
| Separated/divorced/widowed                          | -0.004 | 0.004 | 0.342   | 0.011  | 0.011 | 0.327   | 0.001      | 0.006 | 0.931   | -0.020 | 0.008 | 0.016   |
| <b>Location (ref.: rural)</b>                       |        |       |         |        |       |         |            |       |         |        |       |         |
| Urban                                               | 0.020  | 0.003 | <0.001  | 0.004  | 0.010 | 0.651   | 0.029      | 0.004 | <0.001  | -0.003 | 0.005 | 0.475   |
| <b>Diseased during the past 2 weeks (ref.: Yes)</b> |        |       |         |        |       |         |            |       |         |        |       |         |
| No                                                  | 0.036  | 0.003 | <0.001  | 0.028  | 0.007 | <0.001  | 0.048      | 0.005 | <0.001  | 0.027  | 0.005 | <0.001  |
| <b>Number of chronic diseases (ref.: 0)</b>         |        |       |         |        |       |         |            |       |         |        |       |         |
| 1                                                   | -0.039 | 0.002 | <0.001  | -0.030 | 0.006 | <0.001  | -0.045     | 0.003 | <0.001  | -0.030 | 0.004 | <0.001  |
| ≥2                                                  | -0.083 | 0.003 | <0.001  | -0.063 | 0.008 | <0.001  | -0.093     | 0.005 | <0.001  | -0.072 | 0.006 | <0.001  |
| <b>Smoking (ref.: smoker)</b>                       |        |       |         |        |       |         |            |       |         |        |       |         |

1  
2  
3  
4  
5  
6  
7  
8  
9  
10  
11  
12  
13  
14  
15  
16  
17  
18  
19  
20  
21  
22  
23  
24  
25  
26  
27  
28  
29  
30  
31  
32  
33  
34  
35  
36  
37  
38  
39  
40  
41  
42  
43  
44  
45  
46

|                                                           |        |       |        |        |       |       |        |       |        |        |       |       |
|-----------------------------------------------------------|--------|-------|--------|--------|-------|-------|--------|-------|--------|--------|-------|-------|
| Ex-smoker                                                 | -0.012 | 0.005 | 0.029  | 0.015  | 0.014 | 0.274 | 0.001  | 0.008 | 0.935  | -0.028 | 0.009 | 0.002 |
| Non-smoker                                                | -0.003 | 0.003 | 0.314  | -0.009 | 0.007 | 0.214 | -0.002 | 0.004 | 0.669  | -0.002 | 0.006 | 0.800 |
| <b>Weekly physical activities (ref.: never exercised)</b> |        |       |        |        |       |       |        |       |        |        |       |       |
| 1-5 times                                                 | 0.019  | 0.003 | <0.001 | 0.009  | 0.008 | 0.241 | 0.024  | 0.004 | <0.001 | 0.003  | 0.006 | 0.664 |
| ≥6 times                                                  | 0.028  | 0.004 | <0.001 | 0.026  | 0.009 | 0.007 | 0.026  | 0.005 | <0.001 | 0.022  | 0.007 | 0.002 |

Note: Coe, coefficient; SE, standard error.

For peer review only

# Reporting checklist for cross sectional study.

Based on the STROBE cross sectional guidelines.

## Instructions to authors

Complete this checklist by entering the page numbers from your manuscript where readers will find each of the items listed below.

Your article may not currently address all the items on the checklist. Please modify your text to include the missing information. If you are certain that an item does not apply, please write "n/a" and provide a short explanation.

Upload your completed checklist as an extra file when you submit to a journal.

In your methods section, say that you used the STROBE cross sectional reporting guidelines, and cite them as:

von Elm E, Altman DG, Egger M, Pocock SJ, Gotsche PC, Vandenbroucke JP. The Strengthening the Reporting of Observational Studies in Epidemiology (STROBE) Statement: guidelines for reporting observational studies.

|                           |                                                                                                        | Page   |
|---------------------------|--------------------------------------------------------------------------------------------------------|--------|
|                           | Reporting Item                                                                                         | Number |
| <b>Title and abstract</b> |                                                                                                        |        |
| Title                     | <a href="#">#1a</a> Indicate the study's design with a commonly used term in the title or the abstract | P1,2   |

|    |                      |                     |                                                                 |       |
|----|----------------------|---------------------|-----------------------------------------------------------------|-------|
| 1  | Abstract             | <a href="#">#1b</a> | Provide in the abstract an informative and balanced summary     | P2    |
| 2  |                      |                     |                                                                 |       |
| 3  |                      |                     | of what was done and what was found                             |       |
| 4  |                      |                     |                                                                 |       |
| 5  |                      |                     |                                                                 |       |
| 6  | <b>Introduction</b>  |                     |                                                                 |       |
| 7  |                      |                     |                                                                 |       |
| 8  |                      |                     |                                                                 |       |
| 9  |                      |                     |                                                                 |       |
| 10 | Background /         | <a href="#">#2</a>  | Explain the scientific background and rationale for the         | P4-5  |
| 11 |                      |                     |                                                                 |       |
| 12 | rationale            |                     | investigation being reported                                    |       |
| 13 |                      |                     |                                                                 |       |
| 14 |                      |                     |                                                                 |       |
| 15 | Objectives           | <a href="#">#3</a>  | State specific objectives, including any prespecified           | P6    |
| 16 |                      |                     |                                                                 |       |
| 17 |                      |                     | hypotheses                                                      |       |
| 18 |                      |                     |                                                                 |       |
| 19 |                      |                     |                                                                 |       |
| 20 | <b>Methods</b>       |                     |                                                                 |       |
| 21 |                      |                     |                                                                 |       |
| 22 |                      |                     |                                                                 |       |
| 23 | Study design         | <a href="#">#4</a>  | Present key elements of study design early in the paper         | P6-7  |
| 24 |                      |                     |                                                                 |       |
| 25 |                      |                     |                                                                 |       |
| 26 | Setting              | <a href="#">#5</a>  | Describe the setting, locations, and relevant dates, including  | P6    |
| 27 |                      |                     |                                                                 |       |
| 28 |                      |                     | periods of recruitment, exposure, follow-up, and data           |       |
| 29 |                      |                     |                                                                 |       |
| 30 |                      |                     | collection                                                      |       |
| 31 |                      |                     |                                                                 |       |
| 32 |                      |                     |                                                                 |       |
| 33 |                      |                     |                                                                 |       |
| 34 | Eligibility criteria | <a href="#">#6a</a> | Give the eligibility criteria, and the sources and methods of   | P6-7  |
| 35 |                      |                     |                                                                 |       |
| 36 |                      |                     | selection of participants.                                      |       |
| 37 |                      |                     |                                                                 |       |
| 38 |                      |                     |                                                                 |       |
| 39 |                      |                     |                                                                 |       |
| 40 |                      | <a href="#">#7</a>  | Clearly define all outcomes, exposures, predictors, potential   | P7    |
| 41 |                      |                     |                                                                 |       |
| 42 |                      |                     | confounders, and effect modifiers. Give diagnostic criteria, if |       |
| 43 |                      |                     |                                                                 |       |
| 44 |                      |                     | applicable                                                      |       |
| 45 |                      |                     |                                                                 |       |
| 46 |                      |                     |                                                                 |       |
| 47 | Data sources /       | <a href="#">#8</a>  | For each variable of interest give sources of data and details  | P7-10 |
| 48 |                      |                     |                                                                 |       |
| 49 | measurement          |                     | of methods of assessment (measurement). Describe                |       |
| 50 |                      |                     |                                                                 |       |
| 51 |                      |                     | comparability of assessment methods if there is more than       |       |
| 52 |                      |                     |                                                                 |       |
| 53 |                      |                     | one group. Give information separately for for exposed and      |       |
| 54 |                      |                     |                                                                 |       |
| 55 |                      |                     | unexposed groups if applicable.                                 |       |
| 56 |                      |                     |                                                                 |       |
| 57 |                      |                     |                                                                 |       |
| 58 |                      |                     |                                                                 |       |
| 59 |                      |                     |                                                                 |       |
| 60 |                      |                     |                                                                 |       |

|    |                |                      |                                                               |        |
|----|----------------|----------------------|---------------------------------------------------------------|--------|
| 1  | Bias           | <a href="#">#9</a>   | Describe any efforts to address potential sources of bias     | P6     |
| 2  |                |                      |                                                               |        |
| 3  |                |                      |                                                               |        |
| 4  | Study size     | <a href="#">#10</a>  | Explain how the study size was arrived at                     | P6     |
| 5  |                |                      |                                                               |        |
| 6  |                |                      |                                                               |        |
| 7  | Quantitative   | <a href="#">#11</a>  | Explain how quantitative variables were handled in the        | P6-7   |
| 8  | variables      |                      | analyses. If applicable, describe which groupings were        |        |
| 9  |                |                      | chosen, and why                                               |        |
| 10 |                |                      |                                                               |        |
| 11 |                |                      |                                                               |        |
| 12 |                |                      |                                                               |        |
| 13 |                |                      |                                                               |        |
| 14 |                |                      |                                                               |        |
| 15 | Statistical    | <a href="#">#12a</a> | Describe all statistical methods, including those used to     | P10-11 |
| 16 | methods        |                      | control for confounding                                       |        |
| 17 |                |                      |                                                               |        |
| 18 |                |                      |                                                               |        |
| 19 |                |                      |                                                               |        |
| 20 | Statistical    | <a href="#">#12b</a> | Describe any methods used to examine subgroups and            | P10    |
| 21 | methods        |                      | interactions                                                  |        |
| 22 |                |                      |                                                               |        |
| 23 |                |                      |                                                               |        |
| 24 |                |                      |                                                               |        |
| 25 |                |                      |                                                               |        |
| 26 | Statistical    | <a href="#">#12c</a> | Explain how missing data were addressed                       | P10    |
| 27 | methods        |                      |                                                               |        |
| 28 |                |                      |                                                               |        |
| 29 |                |                      |                                                               |        |
| 30 |                |                      |                                                               |        |
| 31 | Statistical    | <a href="#">#12d</a> | If applicable, describe analytical methods taking account of  | P10-11 |
| 32 | methods        |                      | sampling strategy                                             |        |
| 33 |                |                      |                                                               |        |
| 34 |                |                      |                                                               |        |
| 35 |                |                      |                                                               |        |
| 36 | Statistical    | <a href="#">#12e</a> | Describe any sensitivity analyses                             | P10-11 |
| 37 | methods        |                      |                                                               |        |
| 38 |                |                      |                                                               |        |
| 39 |                |                      |                                                               |        |
| 40 |                |                      |                                                               |        |
| 41 |                |                      |                                                               |        |
| 42 | <b>Results</b> |                      |                                                               |        |
| 43 |                |                      |                                                               |        |
| 44 |                |                      |                                                               |        |
| 45 | Participants   | <a href="#">#13a</a> | Report numbers of individuals at each stage of study—eg       | P11    |
| 46 |                |                      | numbers potentially eligible, examined for eligibility,       |        |
| 47 |                |                      | confirmed eligible, included in the study, completing follow- |        |
| 48 |                |                      | up, and analysed. Give information separately for for         |        |
| 49 |                |                      | exposed and unexposed groups if applicable.                   |        |
| 50 |                |                      |                                                               |        |
| 51 |                |                      |                                                               |        |
| 52 |                |                      |                                                               |        |
| 53 |                |                      |                                                               |        |
| 54 |                |                      |                                                               |        |
| 55 |                |                      |                                                               |        |
| 56 |                |                      |                                                               |        |
| 57 | Participants   | <a href="#">#13b</a> | Give reasons for non-participation at each stage              | P6     |
| 58 |                |                      |                                                               |        |
| 59 |                |                      |                                                               |        |
| 60 |                |                      |                                                               |        |

|    |                   |                      |                                                                   |        |
|----|-------------------|----------------------|-------------------------------------------------------------------|--------|
| 1  | Participants      | <a href="#">#13c</a> | Consider use of a flow diagram                                    | n/a    |
| 2  |                   |                      |                                                                   |        |
| 3  |                   |                      |                                                                   |        |
| 4  | Descriptive data  | <a href="#">#14a</a> | Give characteristics of study participants (eg demographic,       | P11    |
| 5  |                   |                      | clinical, social) and information on exposures and potential      |        |
| 6  |                   |                      | confounders. Give information separately for exposed and          |        |
| 7  |                   |                      | unexposed groups if applicable.                                   |        |
| 8  |                   |                      |                                                                   |        |
| 9  |                   |                      |                                                                   |        |
| 10 |                   |                      |                                                                   |        |
| 11 |                   |                      |                                                                   |        |
| 12 |                   |                      |                                                                   |        |
| 13 |                   |                      |                                                                   |        |
| 14 | Descriptive data  | <a href="#">#14b</a> | Indicate number of participants with missing data for each        | P11    |
| 15 |                   |                      | variable of interest                                              |        |
| 16 |                   |                      |                                                                   |        |
| 17 |                   |                      |                                                                   |        |
| 18 |                   |                      |                                                                   |        |
| 19 | Outcome data      | <a href="#">#15</a>  | Report numbers of outcome events or summary measures.             | P11-12 |
| 20 |                   |                      | Give information separately for exposed and unexposed             |        |
| 21 |                   |                      | groups if applicable.                                             |        |
| 22 |                   |                      |                                                                   |        |
| 23 |                   |                      |                                                                   |        |
| 24 |                   |                      |                                                                   |        |
| 25 |                   |                      |                                                                   |        |
| 26 |                   |                      |                                                                   |        |
| 27 | Main results      | <a href="#">#16a</a> | Give unadjusted estimates and, if applicable, confounder-         | P12-13 |
| 28 |                   |                      | adjusted estimates and their precision (eg, 95% confidence        |        |
| 29 |                   |                      | interval). Make clear which confounders were adjusted for         |        |
| 30 |                   |                      | and why they were included                                        |        |
| 31 |                   |                      |                                                                   |        |
| 32 |                   |                      |                                                                   |        |
| 33 |                   |                      |                                                                   |        |
| 34 |                   |                      |                                                                   |        |
| 35 |                   |                      |                                                                   |        |
| 36 |                   |                      |                                                                   |        |
| 37 | Main results      | <a href="#">#16b</a> | Report category boundaries when continuous variables were         | P12-13 |
| 38 |                   |                      | categorized                                                       |        |
| 39 |                   |                      |                                                                   |        |
| 40 |                   |                      |                                                                   |        |
| 41 |                   |                      |                                                                   |        |
| 42 | Main results      | <a href="#">#16c</a> | If relevant, consider translating estimates of relative risk into | n/a    |
| 43 |                   |                      | absolute risk for a meaningful time period                        |        |
| 44 |                   |                      |                                                                   |        |
| 45 |                   |                      |                                                                   |        |
| 46 |                   |                      |                                                                   |        |
| 47 |                   |                      |                                                                   |        |
| 48 | Other analyses    | <a href="#">#17</a>  | Report other analyses done—e.g., analyses of subgroups            | P12-13 |
| 49 |                   |                      | and interactions, and sensitivity analyses                        |        |
| 50 |                   |                      |                                                                   |        |
| 51 |                   |                      |                                                                   |        |
| 52 |                   |                      |                                                                   |        |
| 53 | <b>Discussion</b> |                      |                                                                   |        |
| 54 |                   |                      |                                                                   |        |
| 55 |                   |                      |                                                                   |        |
| 56 | Key results       | <a href="#">#18</a>  | Summarise key results with reference to study objectives          | P13-14 |
| 57 |                   |                      |                                                                   |        |
| 58 |                   |                      |                                                                   |        |
| 59 |                   |                      |                                                                   |        |
| 60 |                   |                      |                                                                   |        |



|    |                          |                     |                                                                |        |
|----|--------------------------|---------------------|----------------------------------------------------------------|--------|
| 1  | Limitations              | <a href="#">#19</a> | Discuss limitations of the study, taking into account sources  | P18-19 |
| 2  |                          |                     | of potential bias or imprecision. Discuss both direction and   |        |
| 3  |                          |                     | magnitude of any potential bias.                               |        |
| 4  |                          |                     |                                                                |        |
| 5  |                          |                     |                                                                |        |
| 6  |                          |                     |                                                                |        |
| 7  |                          |                     |                                                                |        |
| 8  |                          |                     |                                                                |        |
| 9  | Interpretation           | <a href="#">#20</a> | Give a cautious overall interpretation considering objectives, | P14-18 |
| 10 |                          |                     | limitations, multiplicity of analyses, results from similar    |        |
| 11 |                          |                     | studies, and other relevant evidence.                          |        |
| 12 |                          |                     |                                                                |        |
| 13 |                          |                     |                                                                |        |
| 14 |                          |                     |                                                                |        |
| 15 |                          |                     |                                                                |        |
| 16 | Generalisability         | <a href="#">#21</a> | Discuss the generalisability (external validity) of the study  | P19    |
| 17 |                          |                     | results.                                                       |        |
| 18 |                          |                     |                                                                |        |
| 19 |                          |                     |                                                                |        |
| 20 |                          |                     |                                                                |        |
| 21 |                          |                     |                                                                |        |
| 22 | <b>Other Information</b> |                     |                                                                |        |
| 23 |                          |                     |                                                                |        |
| 24 |                          |                     |                                                                |        |
| 25 | Funding                  | <a href="#">#22</a> | Give the source of funding and the role of the funders for the | P20    |
| 26 |                          |                     | present study and, if applicable, for the original study on    |        |
| 27 |                          |                     | which the present article is based                             |        |
| 28 |                          |                     |                                                                |        |
| 29 |                          |                     |                                                                |        |
| 30 |                          |                     |                                                                |        |
| 31 |                          |                     |                                                                |        |
| 32 |                          |                     |                                                                |        |

33 The STROBE checklist is distributed under the terms of the Creative Commons Attribution License  
34 CC-BY. This checklist was completed on 14. February 2023 using <https://www.goodreports.org/>, a  
35 tool made by the [EQUATOR Network](#) in collaboration with [Penelope.ai](#)  
36  
37  
38  
39  
40  
41  
42  
43  
44  
45  
46  
47  
48  
49  
50  
51  
52  
53  
54  
55  
56  
57  
58  
59  
60
