# Supplementary material for: Health-related quality of life and its changes of the Tibetan population in China: based on the 2013 and 2018 National Health Services Surveys
Source: PubMed Central journal article supplement — BMJ Open. 2023 Nov 19;13(11):e072854. doi: 10.1136/bmjopen-2023-072854 (PMC10660197; doi:10.1136/bmjopen-2023-072854), 2023-11-19
Supplement: bmjopen-2023-072854supp001.pdf [file bmjopen-2023-072854supp001.pdf]

**Supplementary Table 1 Tobit regression analysis on the EQ-5D-3L HSU scores in different altitudes using 3L<sub>2022</sub> value set**

| Characteristics                                     | Total  |       |         | <3500m |       |         | 3500-4000m |       |         | >4000m |       |         |
|-----------------------------------------------------|--------|-------|---------|--------|-------|---------|------------|-------|---------|--------|-------|---------|
|                                                     | Coe    | SE    | P-value | Coe    | SE    | P-value | Coe        | SE    | P-value | Coe    | SE    | P-value |
| <b>Age years (ref.:15-44 years)</b>                 |        |       |         |        |       |         |            |       |         |        |       |         |
| 45-64 years                                         | -0.032 | 0.002 | <0.001  | -0.040 | 0.005 | <0.001  | -0.027     | 0.003 | <0.001  | -0.039 | 0.004 | <0.001  |
| ≥65 years                                           | -0.113 | 0.004 | <0.001  | -0.111 | 0.009 | <0.001  | -0.096     | 0.005 | <0.001  | -0.136 | 0.007 | <0.001  |
| <b>Gender (ref.: male)</b>                          |        |       |         |        |       |         |            |       |         |        |       |         |
| Female                                              | -0.011 | 0.002 | <0.001  | -0.012 | 0.005 | 0.017   | -0.006     | 0.003 | 0.071   | -0.021 | 0.004 | <0.001  |
| <b>Educational attainment (ref.: illiterate)</b>    |        |       |         |        |       |         |            |       |         |        |       |         |
| Primary school                                      | 0.011  | 0.002 | <0.001  | 0.002  | 0.005 | 0.687   | 0.012      | 0.003 | <0.001  | 0.007  | 0.004 | 0.115   |
| Junior high school and above                        | 0.014  | 0.003 | <0.001  | 0.022  | 0.007 | 0.003   | 0.010      | 0.004 | 0.025   | 0.012  | 0.007 | 0.083   |
| <b>Employment (ref.: employed)</b>                  |        |       |         |        |       |         |            |       |         |        |       |         |
| Retired                                             | -0.008 | 0.007 | 0.301   | -0.025 | 0.015 | 0.086   | 0.011      | 0.010 | 0.282   | -0.030 | 0.020 | 0.133   |
| Unemployed                                          | -0.060 | 0.003 | <0.001  | -0.094 | 0.008 | <0.001  | -0.049     | 0.004 | <0.001  | -0.072 | 0.005 | <0.001  |
| <b>Marital status (ref.: single)</b>                |        |       |         |        |       |         |            |       |         |        |       |         |
| Married                                             | 0.017  | 0.003 | <0.001  | 0.017  | 0.008 | 0.027   | 0.018      | 0.004 | <0.001  | 0.016  | 0.006 | 0.005   |
| Separated/divorced/widowed                          | -0.004 | 0.004 | 0.342   | 0.011  | 0.011 | 0.327   | 0.001      | 0.006 | 0.931   | -0.020 | 0.008 | 0.016   |
| <b>Location (ref.: rural)</b>                       |        |       |         |        |       |         |            |       |         |        |       |         |
| Urban                                               | 0.020  | 0.003 | <0.001  | 0.004  | 0.010 | 0.651   | 0.029      | 0.004 | <0.001  | -0.003 | 0.005 | 0.475   |
| <b>Diseased during the past 2 weeks (ref.: Yes)</b> |        |       |         |        |       |         |            |       |         |        |       |         |
| No                                                  | 0.036  | 0.003 | <0.001  | 0.028  | 0.007 | <0.001  | 0.048      | 0.005 | <0.001  | 0.027  | 0.005 | <0.001  |
| <b>Number of chronic diseases (ref.: 0)</b>         |        |       |         |        |       |         |            |       |         |        |       |         |
| 1                                                   | -0.039 | 0.002 | <0.001  | -0.030 | 0.006 | <0.001  | -0.045     | 0.003 | <0.001  | -0.030 | 0.004 | <0.001  |
| ≥2                                                  | -0.083 | 0.003 | <0.001  | -0.063 | 0.008 | <0.001  | -0.093     | 0.005 | <0.001  | -0.072 | 0.006 | <0.001  |
| <b>Smoking (ref.: smoker)</b>                       |        |       |         |        |       |         |            |       |         |        |       |         |

---

|                                                           |        |       |        |        |       |       |        |       |        |        |       |       |
|-----------------------------------------------------------|--------|-------|--------|--------|-------|-------|--------|-------|--------|--------|-------|-------|
| Ex-smoker                                                 | -0.012 | 0.005 | 0.029  | 0.015  | 0.014 | 0.274 | 0.001  | 0.008 | 0.935  | -0.028 | 0.009 | 0.002 |
| Non-smoker                                                | -0.003 | 0.003 | 0.314  | -0.009 | 0.007 | 0.214 | -0.002 | 0.004 | 0.669  | -0.002 | 0.006 | 0.800 |
| <b>Weekly physical activities (ref.: never exercised)</b> |        |       |        |        |       |       |        |       |        |        |       |       |
| 1–5 times                                                 | 0.019  | 0.003 | <0.001 | 0.009  | 0.008 | 0.241 | 0.024  | 0.004 | <0.001 | 0.003  | 0.006 | 0.664 |
| ≥6 times                                                  | 0.028  | 0.004 | <0.001 | 0.026  | 0.009 | 0.007 | 0.026  | 0.005 | <0.001 | 0.022  | 0.007 | 0.002 |

---

Note: Coe, coefficient; SE, standard error.
